# Supplementary material for: The Baylis–Hillman acetates in organic synthesis: development of a facile strategy for synthesis of functionalized unsaturated benzo-fused macrocyclic ethers and [n] metacyclophanes
Source: Royal Society of Chemistry journal article supplement (doi:10.1039/c3ra40926k), 2013-01-01

## Electronic Supplementary Information

### The Baylis-Hillman acetates in organic synthesis: Development of a facile strategy for synthesis of functionalized unsaturated benzo-fused macrocyclic ethers and [n] metacyclophanes

*Deevi Basavaiah,\* Katta Santosh Kumar, Kunche Aravindu and Balthu Lingaiah*  
School of Chemistry, University of Hyderabad  
Hyderabad-500 046, India

| Contents                                                     | Page   |
|--------------------------------------------------------------|--------|
| (1) General & experimental procedures with all spectral data | 2-53   |
| a) Crystal data & ORTEP diagram of compound <b>6a</b>        | 22-23  |
| b) Crystal data & ORTEP diagram of compound <b>6c-E</b>      | 25     |
| c) Crystal data & ORTEP diagram of compound <b>6c-Z</b>      | 26-27  |
| d) Crystal data & ORTEP diagram of compound <b>6k</b>        | 36-37  |
| e) Crystal data & ORTEP diagram of compound <b>6m</b>        | 38-39  |
| f) Crystal data & ORTEP diagram of compound <b>6n</b>        | 40     |
| g) Crystal data & ORTEP diagram of compound <b>6o</b>        | 41     |
| h) Crystal data & ORTEP diagram of compound <b>7a-E</b>      | 42     |
| i) Crystal data & ORTEP diagram of compound <b>7a-Z</b>      | 43-44  |
| j) Crystal data & ORTEP diagram of compound <b>7g</b>        | 51-52  |
| (2) NMR Spectra                                              | 54-121 |

## EXPERIMENTAL SECTION

**General Remarks:** Melting Points were recorded on a Superfit (India) capillary melting point apparatus and were uncorrected. Infrared spectra were recorded on a JASCO FT / IR 5300 spectrophotometer. All the spectra were calibrated against polystyrene absorption at  $1601\text{ cm}^{-1}$ . Solid samples were recorded as KBr wafers and liquid samples as thin film between NaCl plates.  $^1\text{H}$  NMR (400 MHz) and  $^{13}\text{C}$  NMR (100 MHz) spectra were recorded on a Bruker-AVANCE-400 spectrometer in deuteriochloroform ( $\text{CDCl}_3$ ) with tetramethylsilane (TMS,  $\delta = 0$ ) as an internal standard for  $^1\text{H}$  NMR and chloroform-*d* middle peak of the triplet ( $\delta = 77.10\text{ ppm}$ ) as an internal standard for  $^{13}\text{C}$  NMR. Elemental analyses were recorded on a Thermo-Finnigan Flash EA 1112 analyzer. Mass spectra were recorded on Shimadzu-LCMS-2010A mass spectrometer. The X-ray diffraction measurements were carried out at 298 K and 100 K on a Bruker SMART APEX CCD area detector system or Oxford Diffraction Xcalibur Eos Gemini diffractometer equipped with a graphite monochromator and a Mo-K $\alpha$  fine-focus sealed tube ( $\lambda = 0.71073\text{ \AA}$ ).

**General procedure: Synthesis of 3-allyloxy-2-[(*2E*)-3-(2-allyloxyphenyl)-2-methoxycarbonylprop-2-en-1-yl]-5,5-dimethylcyclohex-2-enone (**5a**):** A mixture of methyl 3-acetoxy-3-(2-allyloxyphenyl)-2-methylenepropanoate (**1a**, 0.58g, 2 mmol), 5,5-dimethyl-1,3-cyclohexanedione (**2a**, 0.28g, 2 mmol) and  $\text{K}_2\text{CO}_3$  (0.276g, 2 mmol) in DMF (3 mL) was stirred at room temperature for 6 h. Then allyl bromide (**4a**, 1.21 g, 0.87 mL, 10 mmol) and  $\text{K}_2\text{CO}_3$  (0.276g, 2 mmol) were added and stirring continued for 4 h. Then the reaction mixture was diluted with water (10 mL) and extracted with ethyl acetate (3 x 25 mL). Combined organic layer was washed with saturated NaCl solution (3 x 10 mL) and was dried over anhydrous  $\text{Na}_2\text{SO}_4$ . Solvent was evaporated and the crude product, thus obtained, was purified by silica gel column chromatography (30% ethyl acetate in hexanes) to furnish the title compound (**5a**) as a colorless viscous liquid in 68% (0.558 g) yield.

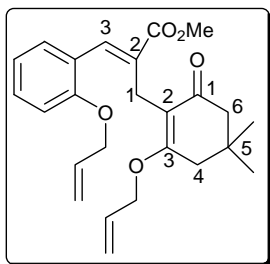

IR (neat) :  $\nu$  1712, 1641, 1614  $\text{cm}^{-1}$ ;  $^1\text{H}$  NMR (400 MHz,  $\text{CDCl}_3$ ) :  $\delta$  0.96 (s, 6H), 2.11 (s, 2H), 2.25 (s, 2H), 3.55 (s, 2H), 3.74 (s, 3H), 4.37 (d,  $J = 4.8$  Hz, 2H), 4.55 (d,  $J = 4.8$  Hz, 2H), 5.12-5.31 (m, 3H), 5.35-5.46 (m, 1H), 5.73-5.89 (m, 1H), 5.98-6.13 (m, 1H), 6.84 (d,  $J = 8.4$  Hz, 1H), 6.86-6.93 (m, 1H), 7.18-7.24 (m, 1H), 7.37 (d,  $J = 7.6$  Hz, 1H), 7.74 (s, 1H);  $^{13}\text{C}$  NMR (100 MHz,  $\text{CDCl}_3$ ) :  $\delta$  21.45, 28.39, 31.91, 39.30, 50.24, 51.77, 68.21, 69.00, 111.71, 116.88, 117.28, 117.57, 120.28, 125.61, 129.25, 130.35, 132.22, 133.15, 133.31, 133.97, 156.39, 169.19, 169.48, 197.29; LCMS (m/z) : 411 (M+H) $^+$ .

In addition, peaks at  $\delta$  1.09 (s), 3.60 (s), 3.75 (s) and 6.73 (s) with low intensity also appeared indicating that they arise from minor (*Z*)-isomer( $\approx 5\%$ )

*E:Z* (95:5) Ratio is determined by the integration of isomeric olefinic protons at  $\delta$  7.74 & 6.73.

**3-Allyloxy-2-[(2*E*)-3-(2-allyloxyphenyl)-2-methoxycarbonylprop-2-en-1-yl]cyclohex-2-enone (5b):**

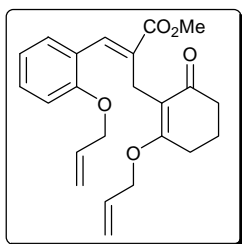

Yield: 67%; reaction time: (6h + 4h); colorless liquid; IR (neat) :  $\nu$  1711, 1645, 1612  $\text{cm}^{-1}$ ;  $^1\text{H}$  NMR (400 MHz,  $\text{CDCl}_3$ ) :  $\delta$  1.71-1.82 (m, 2H), 2.19 (t,  $J = 6.4$  Hz, 2H), 2.37 (t,  $J = 6.0$  Hz, 2H), 3.54 (s, 2H), 3.75 (s, 3H), 4.37 (d,  $J = 4.8$  Hz, 2H), 4.55 (d,  $J = 4.4$  Hz, 2H), 5.12-5.31 (m, 3H), 5.40 (d,  $J = 17.2$  Hz, 1H), 5.72-5.88 (m, 1H), 5.97-6.12 (m, 1H), 6.83 (d,  $J = 8.0$  Hz, 1H), 6.87-6.92 (m, 1H), 7.17-7.24 (m, 1H), 7.31 (d,  $J = 7.6$  Hz, 1H), 7.71 (s, 1H);  $^{13}\text{C}$  NMR (100 MHz,  $\text{CDCl}_3$ ) :  $\delta$  20.74, 21.50, 25.43, 36.34, 51.74, 68.31, 68.96, 111.62, 117.24, 117.61, 118.06, 120.22, 125.72, 129.15, 130.23, 132.46, 132.97, 133.30, 134.00, 156.20, 169.12, 171.10, 197.42; LCMS (m/z) : 383 (M+H) $^+$ .

In addition, peaks at  $\delta$  1.95-2.06 (m), 2.59 (t), 3.45 (s), 3.59 (s), 4.49 (d,  $J = 4.8$  Hz), 6.72 (s) and 7.16 (d,  $J = 8.0$  Hz) with low intensity also appeared indicating that they arise from minor (*Z*)-isomer ( $\approx 5\%$ ).

*E:Z* (95:5) Ratio is determined by the integration of isomeric olefinic protons at  $\delta$  7.71 & 6.72.

**3-Allyloxy-2-[(2*E*)-3-(2-allyloxyphenyl)-2-methoxycarbonylprop-2-en-1-yl]cyclopent-2-enone (5c):**

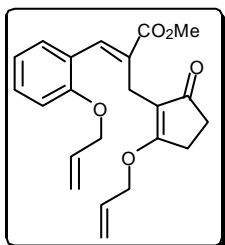

Yield: 58%; reaction time: (6h + 4h); pale yellow solid; mp: 84-86 °C; IR (KBr) :  $\nu$  1712, 1682, 1626  $\text{cm}^{-1}$ ;  $^1\text{H}$  NMR (400 MHz,  $\text{CDCl}_3$ ):  $\delta$  2.37-2.43 (m, 2H), 2.57-2.64 (m, 2H), 3.35 (s, 2H), 3.77 (s, 3H), 4.55-4.65 (m, 4H), 5.20-5.35 (m, 3H), 5.40 (d,  $J = 17.2$  Hz, 1H), 5.80-5.94 (m, 1H), 5.98-6.13 (m, 1H), 6.82-6.97 (m, 2H), 7.20-7.26 (m, 1H), 7.30 (d,  $J = 7.6$  Hz, 1H), 7.88 (s, 1H);  $^{13}\text{C}$  NMR (100 MHz,  $\text{CDCl}_3$ ) :  $\delta$  21.65, 24.73, 33.36, 51.85, 69.07, 69.67, 111.89, 117.30, 117.98, 118.45, 120.41, 125.24, 129.61, 129.84, 130.26, 132.29, 133.24, 135.33, 156.56, 168.80, 183.51, 203.88; LCMS ( $m/z$ ) : 369 ( $\text{M}+\text{H}$ ) $^+$ .

$^1\text{H}$  &  $^{13}\text{C}$  NMR spectra did not indicate the presence of any significant amounts of minor (*Z*)-isomer.

**3-Allyloxy-2-[(2*E*)-3-(2-allyloxy-5-bromophenyl)-2-methoxycarbonylprop-2-en-1-yl]-5,5-dimethylcyclohex-2-enone (5d):**

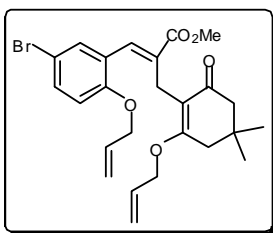

Yield: 56%; reaction time: (6h + 4h); pale yellow solid; mp: 78-80<sup>0</sup>C; IR (KBr) :  $\nu$  1711, 1626, 1599 cm<sup>-1</sup>; <sup>1</sup>H NMR (400 MHz, CDCl<sub>3</sub>):  $\delta$  1.00 (s, 6H), 2.14 (s, 2H), 2.31 (s, 2H), 3.51 (s, 2H), 3.76 (s, 3H), 4.45 (d,  $J$  = 4.8 Hz, 2H), 4.53 (d,  $J$  = 4.8 Hz, 2H), 5.16-5.32 (m, 3H), 5.38 (d,  $J$  = 17.6 Hz, 1H), 5.76-5.91 (m, 1H), 5.95-6.10 (m, 1H), 6.72 (d,  $J$  = 8.8 Hz, 1H), 7.30 (dd,  $J$  = 8.8 & 2.0 Hz, 1H), 7.44 (d,  $J$  = 2.0 Hz, 1H), 7.60 (s, 1H); <sup>13</sup>C NMR (100 MHz, CDCl<sub>3</sub>) :  $\delta$  21.65, 28.43, 31.89, 39.24, 50.19, 51.87, 68.27, 69.29, 112.45, 113.52, 116.43, 117.61, 117.66, 127.62, 131.63, 132.01, 132.70, 132.80, 133.00, 133.59, 155.46, 168.96, 169.46, 197.02; LCMS (m/z) : 489 (M+H)<sup>+</sup>, 491 [(M+H)<sup>+</sup> +2].

<sup>1</sup>H & <sup>13</sup>C NMR spectra did not indicate the presence of minor (*Z*)-isomer.

**3-Allyloxy-2-[(2*E*)-3-(2-allyloxy-5-bromophenyl)-2-methoxycarbonylprop-2-en-1-yl]cyclohex-2-enone (5e):**

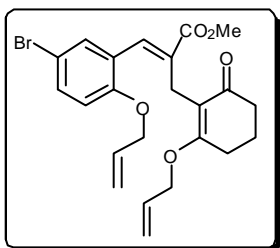

Yield: 62%; reaction time: (6h + 4h); pale yellow solid; mp: 80-82<sup>0</sup>C; IR (KBr) :  $\nu$  1718, 1626, 1601 cm<sup>-1</sup>; <sup>1</sup>H NMR (400 MHz, CDCl<sub>3</sub>):  $\delta$  1.78-1.89 & 1.99-2.03 (2m, 2H), 2.24 & 2.39 (2t,  $J$  = 6.4 Hz, 2H), 2.44 & 2.59 (2t,  $J$  = 6.0 Hz, 2H), 3.46 & 3.50 (2s, 2H), 3.62 & 3.77 (2s, 3H), [4.45 (d,  $J$  = 5.2 Hz), 4.53 (d,  $J$  = 4.8 Hz) & 4.55-4.60 (m), (4H)], 5.16-5.32 (m, 3H), 5.38 (d,  $J$  = 17.2 Hz, 1H), 5.77-5.92 (m, 1H), 5.95-6.10 (m, 1H), 6.60 & 7.57 (2s, 1H)<sup>Δ</sup>, 6.70 & 6.71 (2d,  $J$  = 8.8 Hz, 1H), 7.30 (dd,  $J$  = 8.8 & 2.0 Hz, 1H), 7.38 (s, 1H)\*; <sup>13</sup>C NMR (100 MHz, CDCl<sub>3</sub>) :  $\delta$  20.82, 21.76, 25.46, 36.34, 51.93, 68.46, 69.31, 112.35, 113.46, 117.66, 117.82, 127.75, 131.57, 132.23, 132.78, 132.86, 133.80, 155.36, 168.98, 171.17, 197.22; LCMS (m/z) : 461 (M+H)<sup>+</sup>, 463 [(M+H)<sup>+</sup> +2].

\* Unresolved doublet.

The underlined chemical shift values with low intensity arise due to the presence of minor (*Z*)-isomer ( $\approx 6\%$ ).

$\Delta E:Z$  Ratio (94:6) is determined by the integration of isomeric olefinic protons at  $\delta$  7.57 & 6.60.

**3-Allyloxy-2-[(2*E*)-3-(2-allyloxy-5-chlorophenyl)-2-methoxycarbonylprop-2-en-1-yl]-5,5-dimethylcyclohex-2-enone (5f):**

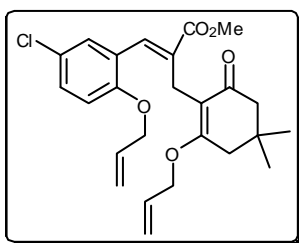

Yield: 66%; reaction time: (6h + 4h); pale yellow solid; mp: 70-72 °C; IR (KBr) :  $\nu$  1712, 1626, 1599  $\text{cm}^{-1}$ ;  $^1\text{H}$  NMR (400 MHz,  $\text{CDCl}_3$ ):  $\delta$  0.99 & 1.09 (2s, 6H), 2.14 & 2.25 (2s, 2H), 2.31 & 2.45 (2s, 2H), 3.41 & 3.51 (2s, 2H), 3.62 & 3.76 (2s, 3H), 4.44 (d,  $J = 4.8$  Hz, 2H), 4.53 (d,  $J = 4.8$  Hz, 2H), 5.15-5.33 (m, 3H), 5.38 (d,  $J = 17.2$  Hz, 1H), 5.77-5.91 (m, 1H), 5.95-6.09 (m, 1H), 6.62 & 7.61 (2s, 1H) $^\Delta$ , 6.70 & 6.76 (2d,  $J = 8.8$  Hz, 1H), [7.11(d) $^*$  & 7.16 (dd), ( $J = 8.8$  & 2.0 Hz), (1H)], 7.32 (d,  $J = 2.0$  Hz, 1H);  $^{13}\text{C}$  NMR (100 MHz,  $\text{CDCl}_3$ ) :  $\delta$  21.69, 28.45, 31.93, 39.30, 50.24, 51.90, 68.29, 69.42, 113.08, 116.51, 117.63, 117.72, 125.16, 127.20, 128.70, 129.98, 132.17, 132.90, 133.04, 133.58, 155.03, 169.01, 169.45, 197.07; LCMS (m/z) : 445 (M+H) $^+$ , 447 [(M+H) $^+$  + 2].

\* Unresolved doublet of doublet.

The underlined chemical shift values with low intensity arise due to the presence of minor (*Z*)-isomer ( $\approx 3\%$ ).

$\Delta E:Z$  (97:3) Ratio is determined by the integration of isomeric olefinic protons at  $\delta$  7.61 & 6.62.

**3-Allyloxy-2-[(2E)-3-(2-allyloxy-5-chlorophenyl)-2-methoxycarbonylprop-2-en-1-yl]cyclohex-2-enone (5g):**

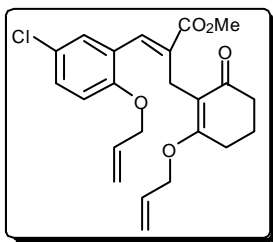

Yield: 62%; reaction time: (6h + 4h); colorless solid; mp: 86-88 °C; IR (KBr) :  $\nu$  1716, 1624, 1599  $\text{cm}^{-1}$ ;  $^1\text{H}$  NMR (400 MHz,  $\text{CDCl}_3$ ):  $\delta$  1.78-1.87 (m, 2H), 2.23 (t,  $J = 6.4$  Hz, 2H), 2.43 (t,  $J = 6.0$  Hz, 2H), 3.50 (s, 2H), 3.77 (s, 3H), 4.44 (d,  $J = 4.8$  Hz, 2H), 4.53 (d,  $J = 4.4$  Hz, 2H), 5.15-5.32 (m, 3H), 5.38 (d,  $J = 17.6$  Hz, 1H), 5.77-5.92 (m, 1H), 5.95-6.09 (m, 1H), 6.76 (d,  $J = 8.8$  Hz, 1H), 7.16 (d,  $J = 8.8$  Hz, 1H), 7.27 (s, 1H)\*, 7.58 (s, 1H);  $^{13}\text{C}$  NMR (100 MHz,  $\text{CDCl}_3$ ) :  $\delta$  20.82, 21.74, 25.45, 36.35, 51.89, 68.43, 69.40, 113.01, 117.61, 117.81, 125.04, 127.30, 128.61, 129.99, 132.32, 132.91, 133.79, 154.89, 168.96, 171.10, 197.18; LCMS (m/z) : 417 (M+H)<sup>+</sup>, 419 [(M+H)<sup>+</sup> + 2]. \* It merges with  $\text{CHCl}_3$  peak.

$^1\text{H}$  and  $^{13}\text{C}$  NMR spectra did not indicate the presence of minor (*Z*)-isomer.

**3-Allyloxy-2-[(2E)-3-(2-allyloxy-3-methoxyphenyl)-2-methoxycarbonylprop-2-en-1-yl]-5,5-dimethylcyclohex-2-enone (5h):**

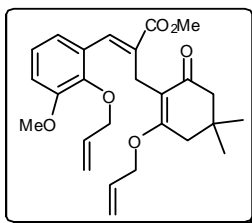

Yield: 57%; reaction time: (6h + 4h); colorless liquid; IR (neat) :  $\nu$  1712, 1645, 1614  $\text{cm}^{-1}$ ;  $^1\text{H}$  NMR (400 MHz,  $\text{CDCl}_3$ ):  $\delta$  0.97 & 1.09 (2s, 6H), 2.05 & 2.12 (2s, 2H), 2.28 & 2.45 (2s, 2H), 3.46 & 3.54 (2s, 2H), 3.58 & 3.74 (2s, 3H), 3.81 & 3.84 (2s, 3H), 4.39 & 4.41 (2d,  $J = 4.8$  Hz, 2H), 4.46 & 4.55 (2d,  $J = 6.0$  Hz, 2H), 5.14-5.27 (m, 3H), 5.33 (d,  $J = 17.2$  Hz, 1H), 5.76-5.90

(m, 1H), 6.00-6.14 (m, 1H), 6.67 & 7.71 (2s, 1H)<sup>Δ</sup>, [6.70-6.82 (m), 6.85 (d,  $J = 8.0$  Hz) & 6.90-7.11 (m), (3H)]; <sup>13</sup>C NMR (100 MHz, CDCl<sub>3</sub>): δ 21.60, 28.39, 31.92, 39.31, 50.25, 51.79, 55.85, 68.24, 74.34, 112.22, 116.58, 117.61, 117.72, 122.11, 123.51, 130.86, 133.00, 133.13, 133.77, 134.27, 146.25, 152.62, 169.06, 169.52, 197.27; LCMS (m/z): 441 (M+H)<sup>+</sup>.

The underlined chemical shift values with low intensity arise due to the presence of minor (*Z*)-isomer (≈5%).

<sup>Δ</sup>*E:Z* (95:5) Ratio is determined by the integration of isomeric olefinic protons at δ 7.71 & 6.67.

**3-Allyloxy-2-[(2*E*)-3-(2-allyloxy-3-methoxyphenyl)-2-methoxycarbonylprop-2-en-1-yl]-cyclohex-2-enone (5i):**

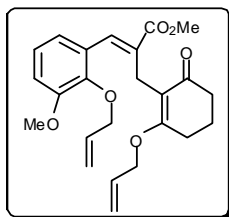

Yield: 62%; reaction time: (6h + 4h); colorless liquid; IR (neat): ν 1712, 1647, 1612 cm<sup>-1</sup>; <sup>1</sup>H NMR (400 MHz, CDCl<sub>3</sub>): δ 1.74-1.85 & 1.99-2.06 (2m, 2H), [2.21 (t,  $J = 6.8$  Hz), 2.30-2.40 (m), (2H)], 2.41 & 2.61 (2t,  $J = 6.0$  Hz, 2H), 3.41 & 3.53 (2s, 2H), 3.59 & 3.75 (2s, 3H), 3.82 & 3.84 (2s, 3H), 4.39 & 4.41 (2d,  $J = 5.2$  Hz, 2H), 4.45 & 4.56 (2d,  $J = 5.6$  Hz, 2H), 4.90-5.02 & 5.13-5.28 (2m, 3H), 5.33 (d,  $J = 17.2$  Hz, 1H), 5.76-5.90 (m, 1H), 6.00-6.13 (m, 1H), 6.63 & 7.68 (2s, 1H)<sup>Δ</sup>, [6.71-6.81 (m) & 6.84 (dd,  $J = 6.8$  & 2.0 Hz), (1H)], 6.90-7.02 (m, 2H); <sup>13</sup>C NMR (100 MHz, CDCl<sub>3</sub>): δ 20.75, 21.60, 25.46, 36.36, 51.77, 55.83, 68.37, 74.26, 112.12, 117.68, 117.80, 122.06, 123.44, 130.92, 132.95, 133.20, 133.80, 134.26, 146.05, 152.52, 169.02, 171.20, 197.44; LCMS (m/z): 413 (M+H)<sup>+</sup>.

The underlined chemical shift values with low intensity are attributed to the presence of minor (*Z*)-isomer (≈7%).



$\Delta E:Z$  Ratio (93:7) is determined by the integration of isomeric olefinic protons at  $\delta$  7.68 and 6.63.

**3-Allyloxy-2-[(2E)-3-(2-allyloxy-3-methoxyphenyl)-2-methoxycarbonylprop-2-en-1-yl]-cyclopent-2-enone (5j):**

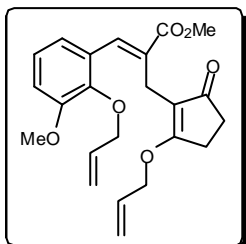

Yield: 65%; reaction time: (6h + 4h); colorless liquid; IR (neat) :  $\nu$  1712, 1689, 1631  $\text{cm}^{-1}$ ;  $^1\text{H}$  NMR (400 MHz,  $\text{CDCl}_3$ ):  $\delta$  2.37-2.45 & 2.46-2.52 (2m, 2H), 2.59-2.66 & 2.69-2.74 (2m, 2H), 3.30 & 3.33 (2s, 2H), 3.59 & 3.77 (2s, 3H), 3.82 & 3.85 (2s, 3H), 4.39 & 4.46 (2d,  $J = 6.0$  Hz, 2H), 4.59 & 4.68 (2d,  $J = 4.8$  Hz, 2H), 5.14-5.41 (m, 4H), 5.82-5.98 (m, 1H), 6.00-6.13 (m, 1H), 6.71 & 7.85 (2s, 1H) $^\Delta$ , 6.73 & 6.87 (2d,  $J = 8.4$  Hz, 1H), 6.81 & 6.92 (2d,  $J = 7.6$  Hz, 1H), 6.96-7.04 (m, 1H);  $^{13}\text{C}$  NMR (100 MHz,  $\text{CDCl}_3$ ) :  $\delta$  21.53, 24.61, 33.24, 51.78, 55.73, 69.64, 74.29, 112.44, 117.68, 117.93, 118.11, 121.81, 123.61, 130.38, 130.53, 132.17, 134.04, 135.33, 146.23, 152.56, 168.51, 183.58, 203.82; LCMS (m/z) : 399 (M+H) $^+$ .

The underlined chemical shift values with low intensity are due to the presence of minor (Z)-isomer ( $\approx 5\%$ ).

$\Delta E:Z$  (95:5) Ratio is determined by the integration of isomeric olefinic protons at  $\delta$  7.85 & 6.71.

**2-[(2E)-3-(2-Allyloxyphenyl)-2-methoxycarbonylprop-2-en-1-yl]-3-(but-3-enyloxy)-5,5-dimethylcyclohex-2-enone (5k):** A mixture of methyl 3-acetoxy-3-(2-allyloxyphenyl)-2-methylenepropanoate (**1a**, 0.58g, 2 mmol), 5,5-dimethyl-1,3-cyclohexanedione (**2a**, 0.28g, 2 mmol) and  $\text{K}_2\text{CO}_3$  (0.276g, 2 mmol) in DMF (3 mL) was stirred at room temperature for 6 h. Then 4-bromo-1-butene (**4b**, 0.54 g, 0.4 mL, 4 mmol) and  $\text{K}_2\text{CO}_3$  (0.276g, 2 mmol) were added and heated to 80  $^\circ\text{C}$  for 2 h. Then the reaction mixture was diluted with water (10 mL) and extracted with ethyl acetate (3 x 25 mL). Combined organic layer was washed with saturated

NaCl solution (3 x 10 mL) and was dried over anhydrous Na<sub>2</sub>SO<sub>4</sub>. Solvent was evaporated and the crude product thus obtained was purified by silica gel column chromatography (30% ethyl acetate in hexanes) to afford compound **5k**, in 56% (0.471 g) as a colorless liquid.

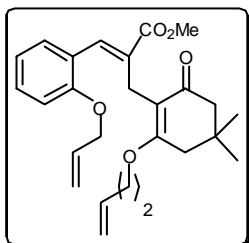

IR (neat) :  $\nu$  1714, 1651, 1610 cm<sup>-1</sup>; <sup>1</sup>H NMR (400 MHz, CDCl<sub>3</sub>) :  $\delta$  0.97 & 1.10 (2s, 6H), [(2.09 (s), 2.23-2.31 (m) & 2.41-2.49 (m), (6H))], 3.42 & 3.55 (2s, 2H), 3.58 & 3.74 (2s, 3H), 3.85 & 4.01 (2t, *J* = 6.8 Hz, 2H), 4.48-4.52 & 4.53-4.59 (2m, 2H), 4.98-5.07 & 5.07-5.16 (2m, 2H), 5.21-5.24 & 5.24-5.30 (2m, 1H), 5.35-5.38 & 5.39-5.46 (2m, 1H), 5.61-5.73 & 5.75-5.86 (2m, 1H), 5.98-6.12 (m, 1H), 6.70 & 7.75 (2s, 1H)<sup>Δ</sup>, [6.81 & 6.84 (2d, *J* = 8.4 Hz) & 6.87-6.93 (m), 2H], [7.15-7.25 (m) & 7.38 (d, *J* = 7.6 Hz) \*, 2H]; <sup>13</sup>C NMR (100 MHz, CDCl<sub>3</sub>) :  $\delta$  21.37, 27.04, 28.40, 28.64, 31.76, 32.06, 33.72, 34.03, 39.40, 50.13, 51.35, 51.69, 67.08, 67.23, 68.92, 69.03, 111.63, 111.93, 115.30, 116.36, 117.08, 117.22, 117.39, 117.67, 120.21, 120.34, 125.48, 128.20, 128.68, 129.23, 130.35, 132.19, 132.51, 133.25, 133.43, 133.64, 133.69, 155.69, 156.36, 169.10, 169.48, 170.26, 170.85, 197.18, 197.20; LCMS (*m/z*): 425 (M+H)<sup>+</sup>.

\* It looks like unresolved doublet of doublet.

The underlined chemical shift values with low intensity arise due to the presence of minor (*Z*)-isomer (≈ 20%).

<sup>Δ</sup>*E:Z* (80:20) Ratio is determined by the integration of isomeric olefinic protons at  $\delta$  7.75 & 6.70.

**2-[(2E)-3-(2-Allyloxyphenyl)-2-methoxycarbonylprop-2-en-1-yl]-3-(but-3-enyloxy)cyclohex-2-enone (5l):**

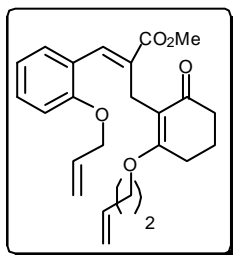

Yield: 60%; reaction time: (6h + 2h); colorless liquid; IR (neat) :  $\nu$  1712, 1643, 1612  $\text{cm}^{-1}$ ;  $^1\text{H}$  NMR (400 MHz,  $\text{CDCl}_3$ ) :  $\delta$  1.68-1.79 & 1.98-2.06 (2m, 2H), [(2.17 (t,  $J$  = 6.4 Hz), 2.22-2.33 (m), 2.36 (t,  $J$  = 6.0 Hz), 2.42-2.49 (m) & 2.59 (t,  $J$  = 6.4 Hz), (6H)], 3.42 & 3.54 (2s, 2H), 3.59 & 3.76 (2s, 3H), 3.85 & 4.03 (2t,  $J$  = 6.8 Hz, 2H), 4.49 & 4.55 (2d,  $J$  = 4.8 Hz, 2H), 4.98-5.14 (m, 2H), 5.20-5.31 (m, 1H), 5.35-5.47 (m, 1H), 5.61-5.74 & 5.76-5.84 (2m, 1H), 5.97-6.12 (m, 1H), 6.69 & 7.72 (2s, 1H)<sup>A</sup>, 6.79-6.93 (m, 2H), 7.15-7.38 (m, 2H);  $^{13}\text{C}$  NMR (100 MHz,  $\text{CDCl}_3$ ) :  $\delta$  20.58, 20.83, 21.32, 25.33, 25.45, 26.88, 33.60, 33.90, 36.17, 51.31, 51.63, 67.06, 67.23, 68.81, 111.43, 111.85, 116.38, 116.86, 117.14, 117.31, 117.40, 117.61, 120.08, 120.30, 125.54, 125.99, 128.09, 128.64, 129.10, 130.16, 132.33, 133.18, 133.34, 133.62, 133.74, 155.61, 156.07, 168.98, 170.23, 171.19, 172.73, 197.31; LCMS (m/z): 397 (M+H)<sup>+</sup>.

The underlined chemical shift values with low intensity are attributed to the presence of minor (*Z*)-isomer ( $\approx 15\%$ ).

<sup>A</sup>*E*:*Z* (85:15) Ratio is determined by the integration of isomeric olefinic protons at  $\delta$  7.72 & 6.69.

**2-[(2E)-3-(2-Allyloxyphenyl)-2-methoxycarbonylprop-2-en-1-yl]-3-(pent-4-enyloxy)cyclopent-2-enone (5m):**

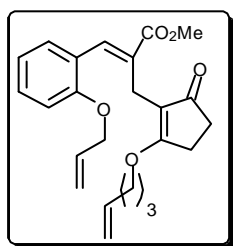

Yield: 64%; reaction time: (6h + 2h); colorless liquid; IR (neat) :  $\nu$  1714, 1633  $\text{cm}^{-1}$ ;  $^1\text{H}$  NMR (400 MHz,  $\text{CDCl}_3$ ):  $\delta$  1.66-1.85 (m, 2H), 2.05-2.15 & 2.16-2.20 (2m, 2H), 2.34-2.42 & 2.48-2.52 (2m, 2H), 2.55-2.62 & 2.65-2.70 (2m, 2H), 3.30 & 3.33 (2s, 2H), 3.58 & 3.77 (2s, 3H), 4.04 & 4.17 (2t,  $J = 6.0$  Hz, 2H), 4.51 & 4.57 (2d,  $J = 5.2$  Hz, 2H), 4.93-5.04 (m, 2H), 5.27 (dd,  $J = 10.4$  & 1.2 Hz, 1H), 5.40 (dd,  $J = 17.2$  & 1.2 Hz, 1H), 5.68-5.80 (m, 1H), 5.98-6.12 (m, 1H), 6.79 & 7.90 (2s, 1H) $^\Delta$ , 6.82 & 6.86 (2d,  $J = 8.4$  Hz, 1H), 6.89-6.94 (m, 1H), 7.14-7.20 & 7.24-7.32 (2m, 2H);  $^{13}\text{C}$  NMR (100 MHz,  $\text{CDCl}_3$ ) :  $\delta$  21.67, 24.84, 28.41, 29.56, 33.24, 51.80, 68.46, 69.00, 111.82, 115.64, 117.27, 117.88, 120.35, 125.11, 129.62, 129.83, 130.16, 133.18, 135.09, 137.18, 156.53, 168.70, 183.91, 203.88; LCMS (m/z): 397 (M+H) $^+$ .

The underlined chemical shift values with low intensity arise due to the presence of minor (*Z*)-isomer ( $\approx 5\%$ ).

$^\Delta E:Z$  (95:5) Ratio is determined by the integration of isomeric olefinic protons at  $\delta$  7.90 & 6.79.

**2-[(2*E*)-3-(2-Allyloxyphenyl)-2-methoxycarbonylprop-2-en-1-yl]-3-(hex-5-enyloxy)cyclopent-2-enone (5n):**

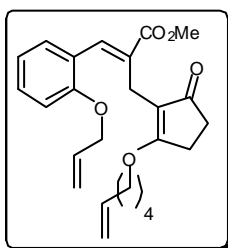

Yield: 65%; reaction time: (6h + 2h); colorless liquid; IR (neat) :  $\nu$  1712, 1689, 1633  $\text{cm}^{-1}$ ;  $^1\text{H}$  NMR (400 MHz,  $\text{CDCl}_3$ ):  $\delta$  1.38-1.48 (m, 2H), 1.59-1.69 (m, 2H), 1.98-2.08 (m, 2H), 2.36-2.43 (m, 2H), 2.54-2.63 (m, 2H), 3.33 (s, 2H), 3.77 (s, 3H), 4.03 (t,  $J = 6.4$  Hz, 2H), 4.54-4.62 (m, 2H), 4.90-5.03 (m, 2H), 5.27(dd,  $J = 10.4$  & 1.2 Hz, 1H), 5.40 (dd,  $J = 17.6$  & 1.2 Hz, 1H), 5.67-5.81 (m, 1H), 5.98-6.12 (m, 1H), 6.86 (d,  $J = 8.0$  Hz, 1H), 6.88-6.92 (m, 1H), 7.21-7.33 (m, 2H), 7.89 (s, 1H);  $^{13}\text{C}$  NMR (100 MHz,  $\text{CDCl}_3$ ) :  $\delta$  21.67, 24.78, 24.82, 28.82, 33.20, 33.23, 51.78,

68.99, 69.19, 111.81, 114.91, 117.23, 117.83, 120.33, 125.13, 129.58, 129.80, 130.16, 133.17, 135.04, 138.12, 156.51, 168.69, 183.94, 203.86; LCMS (m/z): 411 (M+H)<sup>+</sup>.

<sup>1</sup>H & <sup>13</sup>C NMR spectra did not indicate the presence of minor (*Z*)-isomer.

**2-[(2*E*)-3-(2-Allyloxyphenyl)-2-methoxycarbonylprop-2-en-1-yl]-3-(dec-9-enyloxy)cyclopent-2-enone (5o):**

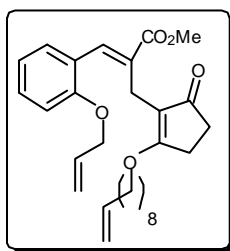

Yield: 67%; reaction time: (6h + 2h); colorless liquid; IR (neat) :  $\nu$  1714, 1697, 1631  $\text{cm}^{-1}$ ; <sup>1</sup>H NMR (400 MHz, CDCl<sub>3</sub>):  $\delta$  1.20-1.42 (m, 10H), 1.57-1.66 & 1.68-1.73 (2m, 2H), 1.97-2.07 (m, 2H), 2.37-2.44 & 2.45-2.50 (2m, 2H), 2.56-2.63 & 2.65-2.70 (2m, 2H), 3.29 & 3.32 (2s, 2H), 3.58 & 3.77 (2s, 3H), 4.02 & 4.15 (2t, *J* = 6.4 Hz, 2H), 4.47-4.52 & 4.56-4.62 (2m, 2H), 4.89-5.03 (m, 2H), [5.22-5.25 (m) & 5.27 (dd, *J* = 10.4 & 1.6 Hz), (1H)], [(5.36-5.38 (m), 5.40 (dd, *J* = 17.2 & 1.6 Hz), 5.42-5.46 (m), (1H)], 5.72-5.88 (m, 1H), 5.98-6.12 (m, 1H), 6.77 & 7.89 (2s, 1H)<sup>Δ</sup>, 6.82 & 6.85 (2d, *J* = 8.4 Hz, 1H), 6.86-6.92 & 6.93-7.02 (2m, 1H), 7.13-7.20 & 7.21-7.32 (2m, 2H); <sup>13</sup>C NMR (100 MHz, CDCl<sub>3</sub>) :  $\delta$  21.72, 24.87, 25.61, 28.87, 29.01, 29.19, 29.31, 29.44, 33.26, 33.75, 51.80, 69.01, 69.44, 111.82, 114.20, 117.26, 117.82, 120.35, 125.18, 129.60, 129.84, 130.21, 133.20, 135.07, 139.11, 156.55, 168.74, 184.08, 203.93; LCMS (m/z): 468 (M+H)<sup>+</sup>.

The underlined chemical shift values with low intensity arise due to the presence of minor (*Z*)-isomer (≈7%).

<sup>Δ</sup>*E*:*Z* (93:7) Ratio is determined by the integration of isomeric olefinic protons at  $\delta$  7.89 & 6.77.

**3-Allyloxy-2-[(2E)-3-(3-allyloxyphenyl)-2-methoxycarbonylprop-2-en-1-yl]-5,5-dimethyl-cyclohex-2-enone (5p):**

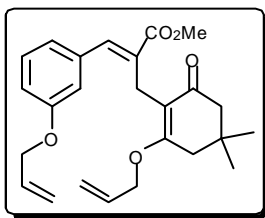

Yield: 63%; reaction time: (6h + 4h); colorless liquid; IR (neat) :  $\nu$  1712, 1649, 1614  $\text{cm}^{-1}$ ;  $^1\text{H}$  NMR (400 MHz,  $\text{CDCl}_3$ ) :  $\delta$  0.97 & 1.01 (2s, 6H), 2.14 & 2.16 (2s, 2H), 2.26 & 2.28 (2s, 2H), 3.41 & 3.61 (2s, 2H), 3.62 & 3.74 (2s, 3H), [4.40 (d,  $J = 4.4$  Hz) & 4.46-4.51 (m), 2H], [4.52 (d,  $J = 4.4$  Hz) & 4.53-4.58 (m), 2H], 5.15-5.32 (m, 3H), 5.40 (d,  $J = 17.2$  Hz, 1H), 5.73-5.88 (m, 1H), 5.98-6.12 (m, 1H), 6.50 & 7.52 (2s, 1H) <sup>$\Delta$</sup> , 6.82 (d,  $J = 8.4$  Hz, 1H), 6.93 (s, 1H), 6.97 (d,  $J = 7.6$  Hz, 1H), 7.20-7.24 (m, 1H);  $^{13}\text{C}$  NMR (100 MHz,  $\text{CDCl}_3$ ) :  $\delta$  21.39, 28.34, 31.86, 39.26, 50.20, 51.86, 68.20, 68.79, 114.43, 115.50, 116.35, 117.64, 122.04, 129.08, 132.55, 132.98, 133.27, 137.45, 137.49, 158.34, 169.24, 169.61, 197.21; LCMS (m/z): 411 (M+H)<sup>+</sup>.

The underlined chemical shift values with low intensity arise due to the presence of minor (*Z*)-isomer ( $\approx 5\%$ ).

<sup>$\Delta$</sup>  *E:Z* (95:5) Ratio is determined by the integration of isomeric olefinic protons at  $\delta$  7.52 & 6.50.

**3-Allyloxy-2-[(2E)-3-(3-allyloxyphenyl)-2-methoxycarbonylprop-2-en-1-yl]cyclohex-2-enone (5q):**

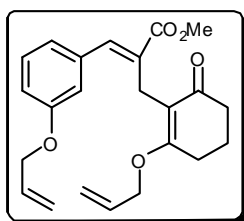

Yield: 69%; reaction time: (6h + 4h); colorless liquid; IR (neat) :  $\nu$  1712, 1651, 1606  $\text{cm}^{-1}$ ;  $^1\text{H}$  NMR (400 MHz,  $\text{CDCl}_3$ ) :  $\delta$  1.77-1.87 (m, 2H), 2.24 (t,  $J = 6.4$  Hz, 2H), 2.41 (t,  $J = 6.4$  Hz, 2H), 3.59 (s, 2H), 3.76 (s, 3H), 4.40 (d,  $J = 4.4$  Hz, 2H), 4.51 (d,  $J = 4.8$  Hz, 2H), 5.16-5.33 (m, 3H), 5.40 (d,  $J = 17.2$  Hz, 1H), 5.76-5.89 (m, 1H), 5.99-6.12 (m, 1H), 6.82 (d,  $J = 8.0$  Hz, 1H), 6.89 (s, 1H), 6.92 (d,  $J = 7.6$  Hz, 1H), 7.18-7.24 (m, 1H), 7.52 (s, 1H);  $^{13}\text{C}$  NMR (100 MHz,  $\text{CDCl}_3$ ) :  $\delta$  20.76, 21.61, 25.47, 36.36, 51.86, 68.35, 68.78, 114.44, 115.25, 117.54, 117.68, 117.72, 121.92, 129.03, 132.69, 132.84, 133.27, 137.39, 137.60, 158.29, 169.25, 171.32, 197.50; LCMS (m/z): 383 (M+H) $^+$ .

In addition, peaks at  $\delta$  3.42 (s), 3.63 (s), 4.48 (d)\*, 4.57 (d)\* and 6.50 (s) with low intensity also appeared indicating that they arise from minor (*Z*)-isomer ( $\approx 3\%$ ).

*E* : *Z* (97:3) Ratio is determined by the integration of isomeric olefinic protons at  $\delta$  7.52 & 6.50.

\* Unresolved doublet.

### 3-Allyloxy-2-[(2*E*)-3-(3-allyloxyphenyl)-2-methoxycarbonylprop-2-en-1-yl]cyclopent-2-enone (5r):

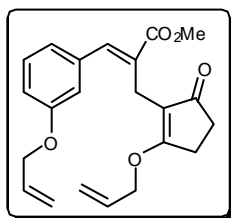

Yield: 52%; reaction time: (6h + 4h); colorless liquid; IR (neat) :  $\nu$  1712, 1689, 1628  $\text{cm}^{-1}$ ;  $^1\text{H}$  NMR (400 MHz,  $\text{CDCl}_3$ ) :  $\delta$  2.39-2.46 & 2.47-2.52 (2m, 2H), 2.58-2.66 & 2.69-2.74 (2m, 2H), 3.28 & 3.40 (2s, 2H), 3.63 & 3.77 (2s, 3H), 4.49 & 4.52 (2d,  $J = 5.2$  Hz, 2H), 4.59 & 4.71 (2d,  $J = 4.8$  Hz, 2H), 5.22-5.35 (m, 3H), 5.40 (d,  $J = 17.2$  Hz, 1H), 5.80-5.96 (m, 1H), 5.99-6.12 (m, 1H), 6.59 & 7.66 (2s, 1H)  $^{\Delta}$ , 6.79 & 6.85 (2d,  $J = 8.4$  Hz, 1H), 6.91-6.99 (m, 2H), 7.18 & 7.23 (2d,  $J = 8.0$  Hz, 1H);  $^{13}\text{C}$  NMR (100 MHz,  $\text{CDCl}_3$ ) :  $\delta$  21.15, 24.47, 33.10, 51.70, 68.47, 69.51,

114.71, 115.12, 117.33, 117.56, 117.77, 121.86, 129.05, 129.88, 131.95, 132.95, 136.76, 138.75, 158.17, 168.47, 183.72, 203.59; LCMS (m/z) : 369(M+H)<sup>+</sup>.

The underlined chemical shift values with low intensity arise due to the presence of minor (*Z*)-isomer (≈4%).

<sup>Δ</sup> *E* : *Z* (96:4) Ratio is determined by the integration of isomeric olefinic protons at δ 7.66 & 6.59.

**3-Allyloxy-2-[(2*E*)-3-(3-allyloxy-4-methoxyphenyl)-2-methoxycarbonylprop-2-en-1-yl]-cyclohex-2-enone (5s):**

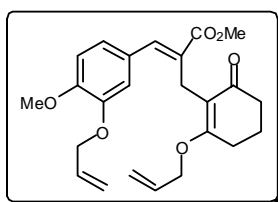

Yield: 63%; reaction time: (6h + 4h); colorless liquid; IR (neat) : ν 1703, 1639, 1604 cm<sup>-1</sup>; <sup>1</sup>H NMR (400 MHz, CDCl<sub>3</sub>) : δ 1.79-1.91 & 1.98-2.04 (2m, 2H), 2.29 & 2.37 (2t, *J* = 6.4 Hz, 2H), 2.44 & 2.61 (2t, *J* = 6.0 Hz, 2H), 3.41 & 3.63 (2s, 2H), 3.66 & 3.75 (2s, 3H), 3.84 & 3.87 (2s, 3H), 4.42 & 4.55<sup>\*</sup> (2d, *J* = 4.8 Hz, 2H), 4.58 & 4.68<sup>\*</sup> (2d, *J* = 5.2 Hz, 2H), 5.15-5.33 (m, 3H), 5.40 (d, *J* = 17.2 Hz, 1H), 5.74-5.89 (m, 1H), 6.01-6.15 (m, 1H), 6.47 & 7.48 (2s, 1H)<sup>Δ</sup>, 6.81 & 6.83 (2d, *J* = 8.4 Hz, 1H), 6.94 (s, 1H), 6.98 (d, *J* = 8.4 Hz, 1H); <sup>13</sup>C NMR (100 MHz, CDCl<sub>3</sub>) : δ 20.81, 21.71, 25.61, 36.47, 51.77, 55.97, 68.40, 69.89, 111.14, 114.80, 117.73, 118.08, 123.17, 128.90, 130.64, 132.86, 133.26, 137.39, 147.45, 149.46, 169.52, 171.42, 197.61; LCMS (m/z) : 413 (M+H)<sup>+</sup>.

The underlined chemical shift values with low intensity arise due to the presence of minor (*Z*)-isomer (≈3%).

<sup>Δ</sup> *E* : *Z* (97:3) Ratio is determined by the integration of isomeric olefinic protons at δ 7.48 & 6.47.

\* Unresolved doublet.



**3-Allyloxy-2-[(2E)-3-(3-allyloxy-4-methoxyphenyl)-2-methoxycarbonylprop-2-en-1-yl]-cyclopent-2-enone (5t):**

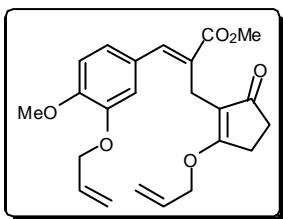

Yield: 67%; reaction time: (6h + 4h); colorless solid; mp: 64-66 °C; IR (KBr) :  $\nu$  1697, 1626, 1593  $\text{cm}^{-1}$ ;  $^1\text{H}$  NMR (400 MHz,  $\text{CDCl}_3$ ) :  $\delta$  2.41-2.49 (m, 2H), 2.61-2.68 (m, 2H), 3.44 (s, 2H), 3.77 (s, 3H), 3.88 (s, 3H), 4.58 (s, 4H), 5.21-5.36 (m, 3H), 5.39 (d,  $J = 17.2$  Hz, 1H), 5.80-5.95 (m, 1H), 6.01-6.15 (m, 1H), 6.85 (d,  $J = 8.4$  Hz, 1H), 6.94-7.05 (m, 2H), 7.62 (s, 1H);  $^{13}\text{C}$  NMR (100 MHz,  $\text{CDCl}_3$ ) :  $\delta$  21.47, 24.77, 33.38, 51.91, 55.94, 69.77, 111.27, 114.86, 118.00, 118.07, 123.50, 127.80, 128.36, 132.17, 133.17, 139.09, 147.57, 149.78, 169.12, 183.91, 203.96; LCMS ( $m/z$ ) : 399 ( $\text{M}+\text{H}$ ) $^+$ .

In addition, peaks at  $\delta$  2.49-2.52 (m), 2.69-2.74 (m), 3.28 (s), 3.65 (s), 3.87 (s), 4.69-4.71 (m), 6.55 (s) and 6.80 (d,  $J = 8.4$  Hz) with low intensity also appeared indicating that they arise from minor (*Z*)-isomer ( $\approx 3\%$ ).

*E* : *Z* (97:3) Ratio is determined by the integration of isomeric olefinic protons at  $\delta$  7.62 & 6.55.

**2-[(2E)-3-(3-Allyloxyphenyl)-2-methoxycarbonylprop-2-en-1-yl]-3-(but-3-enyloxy)-5,5-dimethylcyclohex-2-enone (5u):**

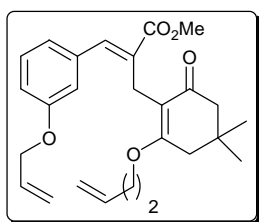

Yield: 58%; reaction time: (6h + 2h); colorless liquid; IR (neat) :  $\nu$  1712, 1645, 1614  $\text{cm}^{-1}$ ;  $^1\text{H}$  NMR (400 MHz,  $\text{CDCl}_3$ ):  $\delta$  0.99 (s, 6H), 2.13 (s, 2H), 2.20-2.32 (m, 4H), 3.60 (s, 2H), 3.75 (s, 3H), 3.89 (t,  $J = 6.8$  Hz, 2H), 4.50-4.56 (m, 2H), 5.00-5.10 (m, 2H), 5.23-5.31 (m, 1H), 5.37-5.45 (m, 1H), 5.63-5.76 (m, 1H), 5.99-6.10 (m, 1H), 6.82 (dd,  $J = 8.4$  & 2.4 Hz, 1H), 6.92-6.96 (m, 1H), 6.97 (d,  $J = 8.0$  Hz, 1H), 7.20-7.24 (m, 1H), 7.51 (s, 1H);  $^{13}\text{C}$  NMR (100 MHz,  $\text{CDCl}_3$ ) :  $\delta$  21.41, 28.41, 31.78, 33.87, 39.47, 50.16, 51.85, 67.16, 68.79, 114.40, 115.62, 116.02, 117.56, 117.66, 122.13, 129.07, 132.72, 133.27, 133.55, 137.22, 137.46, 158.36, 169.22, 169.64, 197.21; LCMS (m/z): 425 (M+H) $^+$ .

$^1\text{H}$  &  $^{13}\text{C}$  NMR spectra did not indicate the presence of any significant amounts of minor (*Z*)-isomer.

**2-[(2*E*)-3-(3-Allyloxyphenyl)-2-methoxycarbonylprop-2-en-1-yl]-3-(but-3-enyloxy)cyclohex-2-enone (5v):**

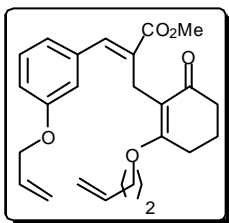

Yield: 62%; reaction time: (6h + 2h); colorless liquid; IR (neat) :  $\nu$  1712, 1645, 1614  $\text{cm}^{-1}$ ;  $^1\text{H}$  NMR (400 MHz,  $\text{CDCl}_3$ ) :  $\delta$  1.73-1.85 (m, 2H), 2.23 (t,  $J = 6.4$  Hz, 2H), 2.26-2.33 (m, 2H), 2.40 (t,  $J = 6.0$  Hz, 2H), 3.58 (s, 2H), 3.77 (s, 3H), 3.90 (t,  $J = 6.8$  Hz, 2H), 4.52 (d,  $J = 5.2$  Hz, 2H), 4.99-5.10 (m, 2H), 5.27 (dd,  $J = 10.4$  & 1.2 Hz, 1H), 5.40 (dd,  $J = 17.2$  & 1.2 Hz, 1H), 5.63-5.78 (m, 1H), 5.98-6.12 (m, 1H), 6.82 (dd,  $J = 8.0$  & 1.6 Hz, 1H), 6.89 (s, 1H), 6.93 (d,  $J = 7.6$  Hz, 1H), 7.17-7.24 (m, 1H), 7.51 (s, 1H);  $^{13}\text{C}$  NMR (100 MHz,  $\text{CDCl}_3$ ) :  $\delta$  20.71, 21.60, 25.51, 33.80, 36.32, 51.82, 67.21, 68.77, 114.37, 115.32, 117.18, 117.55, 117.66, 121.94, 129.00,

132.83, 133.27, 133.58, 137.18, 137.59, 158.28, 169.19, 171.32, 197.41; LCMS (m/z): 397 (M+H)<sup>+</sup>.

<sup>1</sup>H & <sup>13</sup>C NMR spectra did not indicate the presence of minor (*Z*)-isomer.

**2-[(2*E*)-3-(3-Allyloxyphenyl)-2-methoxycarbonylprop-2-en-1-yl]-3-(pent-4-enyloxy)-cyclohex-2-enone (5w):**

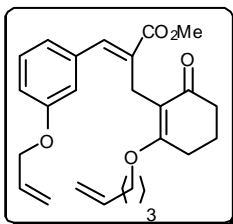

Yield: 61%; reaction time: (6h + 2h); colorless liquid; IR (neat) :  $\nu$  1712, 1645, 1608 cm<sup>-1</sup>; <sup>1</sup>H NMR (400 MHz, CDCl<sub>3</sub>) :  $\delta$  1.60-1.72 (m, 2H), 1.75-1.85 (m, 2H), 2.01-2.10 (m, 2H), 2.23 (t, *J* = 6.4 Hz, 2H), 2.40 (t, *J* = 6.0 Hz, 2H), 3.59 (s, 2H), 3.76 (s, 3H), 3.85 (t, *J* = 6.4 Hz, 2H), 4.51 (d, *J* = 5.2 Hz, 2H), 4.93-5.04 (m, 2H), 5.27 (dd, *J* = 10.4 & 1.2 Hz, 1H), 5.40 (dd, *J* = 17.2 & 1.6 Hz, 1H), 5.67-5.81 (m, 1H), 5.98-6.11 (m, 1H), 6.82 (dd, *J* = 8.0 & 1.6 Hz, 1H), 6.89 (s, 1H), 6.92 (d, *J* = 7.6 Hz, 1H), 7.17-7.25 (m, 1H), 7.51 (s, 1H); <sup>13</sup>C NMR (100 MHz, CDCl<sub>3</sub>) :  $\delta$  20.69, 21.60, 25.52, 28.41, 29.69, 36.27, 51.80, 67.13, 68.73, 114.38, 115.30, 115.44, 116.87, 117.61, 121.92, 128.99, 132.86, 133.24, 137.12, 137.34, 137.54, 158.26, 169.14, 171.68, 197.44; LCMS (m/z) : 411 (M+H)<sup>+</sup>.

In addition, peaks at  $\delta$  2.59 (t), 3.38 (s), 3.64 (s), 4.03 (t) and 6.47 (s) with low intensity also appeared indicating that they are due to the presence of minor (*Z*)-isomer ( $\approx$ 3%).

*E* : *Z* (97:3) Ratio is determined by the integration of isomeric olefinic protons at  $\delta$  7.51 & 6.47.

**2-[(2E)-3-(3-Allyloxyphenyl)-2-methoxycarbonyl-prop-2-ene-1-yl]-3-(pent-4-enyloxy)-cyclopent-2-enone (5x):**

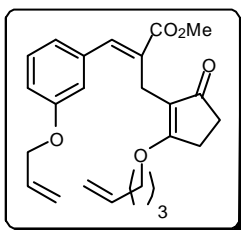

Yield: 69%; reaction time: (6h + 2h); colorless liquid; IR (neat) :  $\nu$  1714, 1689, 1624  $\text{cm}^{-1}$ ;  $^1\text{H}$  NMR (400 MHz,  $\text{CDCl}_3$ ) :  $\delta$  1.66-1.79 & 1.80-1.89 (2m, 2H), 2.07-2.15 & 2.16-2.22 (2m, 2H), 2.37-2.45 & 2.46-2.50 (2m, 2H), 2.56-2.64 & 2.66-2.71 (2m, 2H), 3.25 & 3.39 (2bs, 2H), 3.64 & 3.78 (2s, 3H), 4.05 & 4.18 (2t,  $J = 6.4$  Hz, 2H), 4.51 (d,  $J = 5.2$  Hz, 2H), 4.93-5.04 (m, 2H), 5.27 (dd,  $J = 10.4$  & 1.2 Hz, 1H), 5.40 (dd,  $J = 17.2$  & 1.2 Hz, 1H), 5.67-5.82 (m, 1H), 5.97-6.11 (m, 1H), 6.55 & 7.66 (2s, 1H) <sup>$\Delta$</sup> , 6.77-6.99 (m, 3H), 7.15-7.19 & 7.20-7.29 (2m, 1H);  $^{13}\text{C}$  NMR (100 MHz,  $\text{CDCl}_3$ ) :  $\delta$  21.46, 24.91, 28.46, 29.59, 33.28, 51.98, 68.58, 68.81, 115.02, 115.51, 115.74, 117.54, 117.68, 122.18, 129.32, 130.22, 133.22, 137.05, 137.13, 139.04, 158.47, 168.76, 184.20, 203.89; LCMS (m/z) : 397 (M+H)<sup>+</sup>.

The underlined chemical shift values with low intensity are attributed to the presence of minor (*Z*)-isomer ( $\approx 4\%$ ).

<sup>$\Delta$</sup> *E*:*Z* (96:4) Ratio is determined by the integration of isomeric olefinic protons at  $\delta$  7.66 & 6.55.

**General procedure: Synthesis of (4*E*,15*E*)-10,10-dimethyl-2,7-dioxa-15-methoxycarbonyl-tricyclo[15.4.0.0<sup>8,13</sup>]henicosane-1(17),4,8(13),15,18,20-hexaen-12-one (6a):** To a stirred solution of 3-allyloxy-2-[(2*E*)-3-(2-allyloxyphenyl)-2-methoxycarbonylprop-2-en-1-yl]-5,5-dimethylcyclohex-2-enone (**5a**, 0.205g, 0.5 mmol) in dichloromethane (50 mL) at reflux temperature was added 1M Ti(O-<sup>*i*</sup>Pr)<sub>4</sub> (0.1 mL, 20 mol%) in dichloromethane. After stirring for 1 h Grubbs' 1<sup>st</sup> generation catalyst (12.3 mg, 3 mol%) in dichloromethane (10 mL) was added drop wise and stirring continued for another 4 h at reflux temperature. Reaction mixture was allowed to cool to room temperature and quenched with saturated NaHCO<sub>3</sub> solution. Organic layer was separated and the aqueous layer was washed with dichloromethane (3 x 25 mL). Combined Organic layer was dried over anhydrous Na<sub>2</sub>SO<sub>4</sub>. Solvent was evaporated and the crude product was purified by silica gel column chromatography (40% ethyl acetate / hexanes) followed by re-crystallization (35% ethyl acetate in hexanes) to provide the title compound (**6a**) as a colorless solid in 70% (0.133 g) yield.

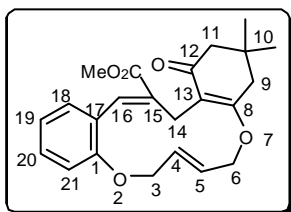

Mp: 146-148 °C; IR (KBr) :  $\nu$  1714, 1645, 1606 cm<sup>-1</sup>; <sup>1</sup>H NMR (400 MHz, CDCl<sub>3</sub>) :  $\delta$  0.96 (s, 6H), 2.19 (s, 2H), 2.24 (s, 2H), 3.64 (s, 2H), 3.72 (s, 3H), 4.18 (s, 2H), 4.32-4.92 (b, 2H), 5.50-5.64 (m, 1H), 5.98-6.12 (m, 1H), 7.04-7.15 (m, 2H), 7.24-7.32 (m, 1H), 7.35 (d, *J* = 7.6 Hz, 1H), 7.78 (s, 1H); <sup>13</sup>C NMR (100 MHz, CDCl<sub>3</sub>) :  $\delta$  20.45, 28.44, 32.01, 39.38, 50.38, 51.82, 66.28, 75.24, 117.30, 122.36, 123.71, 128.59, 130.00, 130.28, 131.26, 131.83, 132.94, 134.78, 156.57, 169.22, 169.48, 197.09; LCMS (m/z) : 383 (M+H)<sup>+</sup>; Analysis calc'd. for C<sub>23</sub>H<sub>26</sub>O<sub>5</sub>: C, 72.23; H, 6.85; Found: C, 72.36; H, 6.79.

To understand more about broad peak at  $\delta$  4.32-4.92, we recorded <sup>1</sup>H NMR spectra at -40°C  
**<sup>1</sup>H NMR at -40 °C (400 MHz, CDCl<sub>3</sub>) :  $\delta$  0.95 (s, 3H), 1.06 (s, 3H), 2.18-2.46 (m, 4H), 3.53 & 3.72 (ABq, *J* = 14.8 Hz, 2H)\*, 3.74 (s, 3H), 4.09-4.17 (m, 1H), 4.23-4.34 (m, 2H), 4.98 (dd, *J* =**

11.6 & 4.4 Hz, 1H), 5.50-5.63 (m, 1H), 5.98-6.14 (m, 1H), 7.08-7.20 (m, 2H), 7.32-7.43 (m, 2H), 7.84 (s, 1H).

\* One peak of the AB quartet merges with singlet at  $\delta$  3.74.

*The following differences were observed between  $^1\text{H}$  NMR spectra at room temperature and at  $-40^\circ\text{C}$ .*

*1. Singlet at  $\delta$  0.96 (6H) at room temperature appeared as two singlets, one at  $\delta$  0.95 (3H) and the second one at  $\delta$  1.06 (3H) at  $-40^\circ\text{C}$ .*

*2. Singlets at  $\delta$  2.19 (2H) & 2.24 (2H) at room temperature appeared as a multiplet at  $\delta$  2.18-2.46 (4H) at  $-40^\circ\text{C}$ .*

*3. Singlet at  $\delta$  3.64 (2H) at room temperature appeared as a AB quartet at  $\delta$  3.53 & 3.72 (2H) at  $-40^\circ\text{C}$ .*

*4. Singlet at  $\delta$  4.18 (2H) and broad peak at  $\delta$  4.32-4.92 (2H) at room temperature appeared as (two) multiplets at  $\delta$  4.09-4.17 (1H) & 4.23-4.34 (2H) and a doublet of doublet (dd) at  $\delta$  4.98 (1H) at  $-40^\circ\text{C}$ .*

These differences may be attributed to the conformational changes at low temperature (rigid conformation) and room temperature (flexible conformation).

**Crystal data for 6a:** Empirical formula,  $\text{C}_{23}\text{H}_{26}\text{O}_5$ ; Formula weight, 382.44; crystal color, colorless; habit, block; crystal dimensions, 0.20 x 0.18 x 0.10  $\text{mm}^3$ ; crystal system, monoclinic; lattice type, primitive; lattice parameters,  $a = 12.6354(9)$  Å,  $b = 10.1017(7)$  Å,  $c = 15.6517(11)$  Å,  $\alpha = 90.00$ ,  $\beta = 95.2200(10)$ ,  $\gamma = 90.00$ ;  $V = 1989.5(2)$  Å<sup>3</sup>; space group,  $\text{p}2(1)/\text{c}$ ;  $Z = 4$ ;  $D_{\text{cald}} = 1.277$  g /  $\text{cm}^3$ ;  $F_{000} = 816$ ;  $\lambda$  (Mo-K $\alpha$ ) = 0.71073 Å;  $R(I \geq 2\sigma_1) = 0.0975$ ,  $wR^2 = 0.1945$ . Detailed X-ray crystallographic data is available from the Cambridge Crystallographic Data Centre, 12 Union Road, Cambridge CB2 1EZ, UK (for compound **6a** CCDC # 914817).

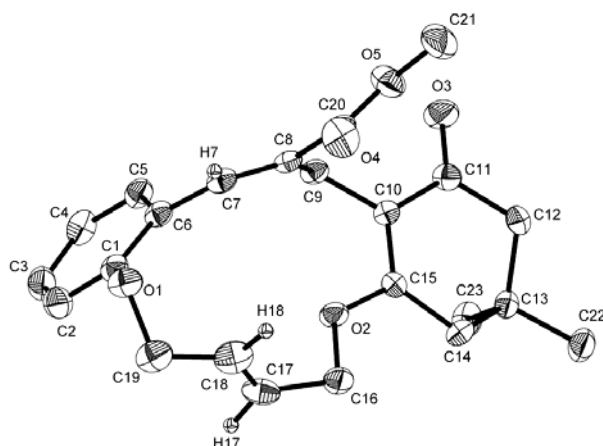

ORTEP diagram of compound **6a**

We have obtained single crystals of the compounds **6a**, **6c-E**, **6c-Z**, **6k**, **6m**, **6n**, **6o**, **7a-E**, **7a-Z**, and **7g** from 35-40% ethyl acetates in hexanes).

**(4E,15E)-2,7-Dioxa-15-methoxycarbonyltricyclo[15.4.0.0<sup>8,13</sup>]henicosane-1(17),4,8(13),15,18-20-hexaen-12-one (6b):**

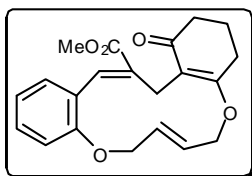

Yield: 63%; reaction time: (1h + 4h); colorless solid; mp: 156-158 °C; IR (KBr) :  $\nu$  1714, 1645, 1604  $\text{cm}^{-1}$ ;  $^1\text{H}$  NMR (400 MHz,  $\text{CDCl}_3$ ) :  $\delta$  1.80 (b, 2H), 2.25-2.45 (m, 4H), 3.63 (s, 2H), 3.73 (s, 3H), 4.21 (d,  $J = 5.6$  Hz, 2H), 4.35-4.88 (m, 2H), 5.52-5.65 (m, 1H), 5.96-6.08 (m, 1H), 7.01-7.14 (m, 2H), 7.28-7.38 (m, 2H), 7.77 (s, 1H);  $^{13}\text{C}$  NMR (100 MHz,  $\text{CDCl}_3$ ) :  $\delta$  20.63, 25.34, 36.49, 51.74, 66.28, 75.01, 118.52, 122.14, 123.50, 128.73, 129.95, 130.41, 131.23, 131.97, 132.98, 134.75, 156.46, 169.23, 171.17, 197.49; LCMS ( $m/z$ ) : 355 ( $\text{M}+\text{H}$ )<sup>+</sup>; Analysis calc'd. for  $\text{C}_{21}\text{H}_{22}\text{O}_5$ : C, 71.17; H, 6.26; Found: C, 71.25; H, 6.21.

To understand more about broad peak at  $\delta$  4.35-4.88, we recorded  $^1\text{H}$  NMR spectra at -40 °C.

$^1\text{H}$  NMR at  $-40\text{ }^\circ\text{C}$  (400 MHz,  $\text{CDCl}_3$ ) :  $\delta$  1.80-2.02 (m, 2H), 2.28-2.65 (m, 4H), 3.51 & 3.73 (ABq,  $J = 15.2\text{ Hz}$ , 2H)\*, 3.74 (s, 3H), 4.15-4.40 (m, 3H), 4.95-5.07 (m, 1H), 5.52-5.67 (m, 1H), 5.98-6.14 (m, 1H), 7.08-7.23 (m, 2H), 7.28-7.44 (m, 2H), 7.83 (s, 1H).

\* One peak of the AB quartet merges with singlet at  $\delta$  3.74.

The following differences were observed between  $^1\text{H}$  NMR spectra at room temperature and at  $-40\text{ }^\circ\text{C}$ .

1. Singlet at  $\delta$  3.63 (2H) at room temperature appeared as a AB quartet at  $\delta$  3.51 & 3.73 (2H) at  $-40\text{ }^\circ\text{C}$ .

2. Doublet at  $\delta$  4.21 (2H) and multiplet at  $\delta$  4.35-4.88 (2H) at room temperature appeared as (two) multiplets at  $\delta$  4.15-4.40 (3H) & 4.95-5.07 (1H) at  $-40\text{ }^\circ\text{C}$ .

These differences may be attributed to the conformational changes at low temperature (rigid-conformation) and room temperature (flexible conformation).

(*E*) and (*Z*)-Isomers of the compounds **6c**, **6j**, **7a-e** were separated by silica gel column chromatography [solvent system: 50% ethyl acetate in hexanes (for compounds **6c**, **6j**, **7c**, **7e**) and 40% ethyl acetate in hexanes ((for compounds **7a**, **7b**, **7d**). In all these cases (*E*)-isomers eluted first (less polar) while (*Z*)-isomers eluted later (more polar). [ (*E*) and (*Z*)-stereochemistry refers to the newly formed double bond after RCM reaction].

**(4*E*,14*E*)-2,7-Dioxa-15-methoxycarbonyltricyclo[15.3.0.0<sup>8,13</sup>]icosane-1(17),4,8(13),9,11,14-hexaen-18-one (6c-*E*):**

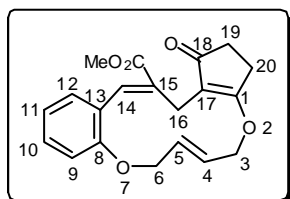

Yield: 53%; reaction time: (1h + 4h); colorless solid; mp: 142-144  $^\circ\text{C}$ ; IR (KBr) :  $\nu$  1699, 1633, 1604  $\text{cm}^{-1}$ ;  $^1\text{H}$  NMR (400 MHz,  $\text{CDCl}_3$ ) :  $\delta$  2.21 (bs, 4H), 3.56 (s, 2H), 3.85 (s, 3H), 4.39 (d,  $J =$



6.4 Hz, 2H), 4.59 (b, 2H), 5.60-5.72 (m, 1H), 5.97-6.10 (m, 1H), 6.96-7.06 (m, 2H), 7.20-7.33 (m, 2H), 7.93 (s, 1H);  $^{13}\text{C}$  NMR (100 MHz,  $\text{CDCl}_3$ ) :  $\delta$  19.58, 24.71, 33.61, 52.34, 66.52, 74.43, 120.32, 121.33, 123.42, 129.23, 129.47, 129.95, 130.13, 130.32, 134.20, 135.38, 156.06, 169.20, 183.35, 204.30; LCMS (m/z) : 341 ( $\text{M}+\text{H}$ ) $^+$ ; Analysis calc'd. for  $\text{C}_{20}\text{H}_{20}\text{O}_5$ : C, 70.57; H, 5.92; Found: C, 70.45; H, 5.87.

**Crystal data for 6c-E:** Empirical formula,  $\text{C}_{20}\text{H}_{20}\text{O}_5$ ; Formula weight, 340.36; crystal color, colorless; habit, block; crystal dimensions, 0.28 x 0.20 x 0.14  $\text{mm}^3$ ; crystal system, monoclinic; lattice type, primitive; lattice parameters,  $a = 9.5864(7)$  Å,  $b = 12.2835(9)$  Å,  $c = 14.5863(10)$  Å,  $\alpha = 90.00$ ,  $\beta = 97.9790(10)$ ,  $\gamma = 90.00$ ;  $V = 1701.0(2)$  Å $^3$ ; space group,  $p2(1)/n$ ;  $Z = 4$ ;  $D_{\text{calc}} = 1.329$  g /  $\text{cm}^3$ ;  $F_{000} = 720$ ;  $\lambda$  (Mo-K $\alpha$ ) = 0.71073 Å;  $R(I \geq 2\sigma_1) = 0.0567$ ,  $wR^2 = 0.1340$ . Detailed X-ray crystallographic data is available from the Cambridge Crystallographic Data Centre, 12 Union Road, Cambridge CB2 1EZ, UK (for compound **6c-E** CCDC # 914818).

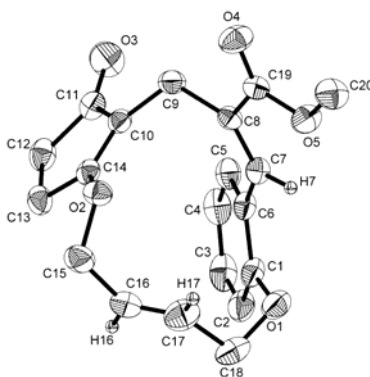

ORTEP diagram of compound **6c-E**

**(4Z,14E)-2,7-Dioxa-15-methoxycarbonyltricyclo[15.3.0.0 $^{8,13}$ ]icosane-1(17),4,8(13),9,11,14-hexaen-18-one (6c-Z):**

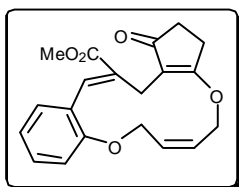

Yield: 35%; reaction time: (1h + 4h); colorless solid; mp: 144-146  $^{\circ}\text{C}$ ; IR (KBr) :  $\nu$  1695, 1631, 1604  $\text{cm}^{-1}$ ;  $^1\text{H}$  NMR (400 MHz,  $\text{CDCl}_3$ ) :  $\delta$  2.32-2.37 (m, 2H), 2.39-2.45 (m, 2H), 3.37 (d,  $J = 0.8$  Hz, 2H), 3.76 (s, 3H), 4.61 (dd,  $J = 5.6$  & 0.8 Hz, 2H), 4.82 (dd,  $J = 5.6$  & 0.8 Hz, 2H),

5.64-5.75 (m, 1H), 5.91-6.00 (m, 1H), 6.91 (dd,  $J = 8.4$  &  $0.8$  Hz, 1H), 6.99-7.05 (m, 1H), 7.11 (dd,  $J = 7.6$  &  $0.8$  Hz, 1H), 7.21-7.25 (m, 1H), 7.83 (s, 1H);  $^{13}\text{C}$  NMR (100 MHz,  $\text{CDCl}_3$ ) :  $\delta$  20.18, 25.45, 33.20, 51.97, 65.70, 66.41, 117.34, 117.66, 122.37, 126.59, 127.72, 129.25, 130.46, 131.48, 131.76, 137.29, 155.17, 167.97, 183.34, 203.81; LCMS (m/z) : 341 (M+H) $^+$ ; Analysis calc'd. for  $\text{C}_{20}\text{H}_{20}\text{O}_5$ : C, 70.57; H, 5.92; Found: C, 70.45; H, 5.98.

*Following differences were observed between  $^1\text{H}$  and  $^{13}\text{C}$  NMR spectra of (E)- & (Z)- isomers (this stereochemistry refers to the newly formed double bond after RCM reaction) .*

*In  $^1\text{H}$  NMR spectra:*

- 1. Broad singlet at  $\delta$  2.21 (4H) of (E)-isomer appeared as two multiplets at  $\delta$  2.32-2.37 (2H) & 2.39-2.45 (2H) in (Z)-isomer.*
- 2. Doublet at  $\delta$  4.39 (2H) and broad singlet at  $\delta$  4.59 (2H) of (E)-isomer appeared as doublet of doublets (dd) at  $\delta$  4.61 (2H) & 4.82 (2H) in (Z)-isomer.*
- 3. Multiplets at  $\delta$  6.96-7.06 (2H) & 7.20-7.33 (2H) of (E)-isomer appeared as (two) doublet of doublets (dd) at  $\delta$  6.91(1H) & 7.11 (1H) and (two) multiplets at  $\delta$  6.99-7.05 (1H), 7.21-7.25 (1H) in (Z)-isomer.*

*In  $^{13}\text{C}$  NMR spectra:*

- 4. Allyloxy carbons ( $\text{C}_3$  &  $\text{C}_6$ ) of (E)-isomer appeared at  $\delta$  66.52 & 74.43 while the same carbons in (Z)-isomer appeared at  $\delta$  65.70 & 66.41.*

**Crystal data for 6c-Z:** Empirical formula,  $\text{C}_{20}\text{H}_{20}\text{O}_5$ ; Formula weight, 340.36; crystal color, colorless; habit, plate; crystal dimensions,  $0.20 \times 0.18 \times 0.10 \text{ mm}^3$ ; crystal system, monoclinic; lattice type, primitive; lattice parameters,  $a = 20.440(6) \text{ \AA}$ ,  $b = 10.579(3) \text{ \AA}$ ,  $c = 7.873(2) \text{ \AA}$ ,  $\alpha = 90.00$ ,  $\beta = 92.119(5)$ ,  $\gamma = 90.00$ ;  $V = 1701.1(8) \text{ \AA}^3$ ; space group,  $\text{p}2(1)/\text{c}$ ;  $Z = 4$ ;  $D_{\text{cald}} = 1.329 \text{ g / cm}^3$ ;  $F_{000} = 720$ ;  $\lambda$  (Mo-K $\alpha$ ) =  $0.71073 \text{ \AA}$ ;  $R(I \geq 2\sigma_1) = 0.0503$ ,  $wR^2 = 0.1175$ . Detailed X-ray

crystallographic data is available from the Cambridge Crystallographic Data Centre, 12 Union Road, Cambridge CB2 1EZ, UK (for compound **6c-Z** CCDC # 914819).

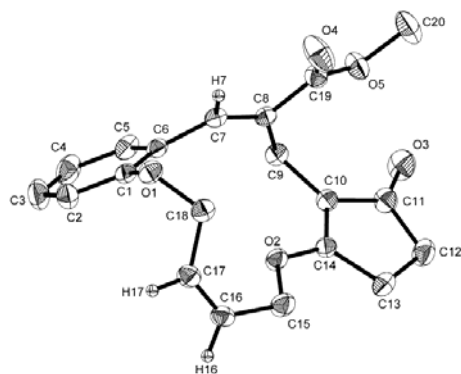

ORTEP diagram of compound **6c-Z**

**(4E,15E)-19-Bromo-10,10-dimethyl-2,7-dioxa-15- methoxycarbonyltricyclo-[15.4.0.0<sup>8,13</sup>]  
henicosane-1(17),4,8(13),15,18,20-hexaen-12-one (6d):**

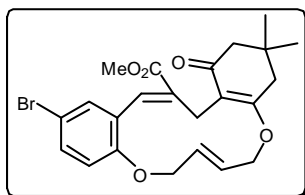

Yield: 61%; reaction time: (1h + 4h); colorless solid; mp: 136-138 °C; IR (KBr) :  $\nu$  1714, 1657, 1612  $\text{cm}^{-1}$ ;  $^1\text{H}$  NMR (400 MHz,  $\text{CDCl}_3$ ) :  $\delta$  0.98 (s, 6H), 2.22 (s, 2H), 2.25 (s, 2H), 3.62 (b, 2H), 3.72 (s, 3H), 4.18 (b, 2H), 4.29-4.92 (m, 2H), 5.52-5.63 (m, 1H), 5.96-6.08 (m, 1H), 6.96 (d,  $J = 8.4$  Hz, 1H), 7.39 (dd,  $J = 8.4$  & 2.0 Hz, 1H), 7.45 (d,  $J = 2.0$  Hz, 1H), 7.66 (s, 1H);  $^{13}\text{C}$  NMR (100 MHz,  $\text{CDCl}_3$ ) :  $\delta$  20.44, 28.40, 31.99, 39.30, 50.28, 51.90, 66.11, 75.42, 116.55, 116.79, 124.13, 128.97, 132.64, 132.74, 133.10, 133.18, 155.58, 168.84, 169.52, 196.78; LCMS (m/z) : 461 (M+H)<sup>+</sup>, 463 [(M+H)<sup>+</sup> +2]; Analysis calc'd. for  $\text{C}_{23}\text{H}_{25}\text{BrO}_5$ : C, 59.88; H, 5.46; Found: C, 59.95; H, 5.40.

In addition, two singlets, one at  $\delta$  0.99 and the other one at  $\delta$  3.71 with low intensity also appeared. These may be attributed to the presence of minor (*Z*)-isomer ( $\approx 2\%$ ) at C4-C5 double bond.

To understand more about broad peak at  $\delta$  4.29-4.92, we recorded  $^1\text{H}$  NMR spectra at  $-40^\circ\text{C}$ .

**$^1\text{H}$  NMR at  $-40^\circ\text{C}$  (400 MHz,  $\text{CDCl}_3$ )** :  $\delta$  0.98 (s, 3H), 1.07 (s, 3H), 2.20-2.48 (m, 4H), 3.48 & 3.72 (ABq,  $J = 15.2$  Hz, 2H)\*, 3.74 (s, 3H), 4.09-4.34 (m, 3H), 4.98 (dd,  $J = 11.6$  & 4.0 Hz, 1H), 5.50-5.64 (m, 1H), 5.97-6.10 (m, 1H), 7.03 (d,  $J = 9.2$  Hz, 1H), 7.40-7.52 (m, 2H), 7.73 (s, 1H).

\* One peak of the AB quartet merges with singlet at  $\delta$  3.74.

*The following differences were observed between  $^1\text{H}$  NMR spectra at room temperature and at  $-40^\circ\text{C}$ .*

- 1. Singlet at  $\delta$  0.98 (6H) at room temperature appeared as two singlets, one at  $\delta$  0.98 (3H) and the second one at  $\delta$  1.07 (3H) at  $-40^\circ\text{C}$ .*
- 2. Singlets at  $\delta$  2.22 (2H) & 2.25 (2H) at room temperature appeared as a multiplet at  $\delta$  2.20-2.48 (4H) at  $-40^\circ\text{C}$ .*
- 3. Broad singlet at  $\delta$  3.62 (2H) at room temperature appeared as a AB quartet at  $\delta$  3.48 & 3.72 (2H) at  $-40^\circ\text{C}$ .*
- 4. Broad singlet at  $\delta$  4.18 (2H) and multiplet at  $\delta$  4.29-4.92 (2H) at room temperature appeared as a multiplet at  $\delta$  4.09-4.34 (3H) and a doublet of doublet at  $\delta$  4.98 (1H) at  $-40^\circ\text{C}$ .*
- 5. Doublet of doublet at  $\delta$  7.39 (1H) and doublet at  $\delta$  7.45 (1H) at room temperature appeared as a multiplet at  $\delta$  7.40-7.52 (2H) at  $-40^\circ\text{C}$ .*

These differences may be attributed to the conformational changes at low temperature (rigid conformation) and room temperature (flexible conformation).

**(4E,15E)-19-Bromo-2,7-dioxa-15-methoxycarbonyltricyclo[15.4.0.0<sup>8,13</sup>]henicosane-1(17),4-8(13),15,18,20-hexaen-12-one (6e):**

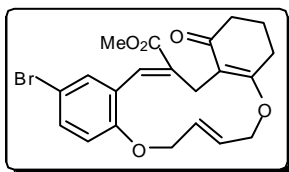

Yield: 58%; reaction time: (1h + 4h); colorless solid; mp: 168-170 °C; IR (KBr) :  $\nu$  1707, 1643, 1610  $\text{cm}^{-1}$ ;  $^1\text{H}$  NMR (400 MHz,  $\text{CDCl}_3$ ) :  $\delta$  1.83 (b, 2H), 2.28-2.50 (m, 4H), 3.62 (b, 2H), 3.73 (s, 3H), 4.22 (b, 2H), 4.33-5.06 (m, 2H), 5.54-5.65 (m, 1H), 5.94-6.09 (m, 1H), 6.96 (d,  $J = 8.0$  Hz, 1H), 7.36-7.45 (m, 2H), 7.65 (s, 1H);  $^{13}\text{C}$  NMR (100 MHz,  $\text{CDCl}_3$ ) :  $\delta$  20.59, 20.64, 25.26, 36.39, 51.84, 66.06, 75.17, 116.29, 117.95, 123.89, 129.14, 132.69, 132.85, 133.06, 133.13, 133.19, 155.43, 168.85, 171.16, 197.18; LCMS (m/z) : 433 (M+H)<sup>+</sup>, 435 [(M+H)<sup>+</sup> +2]; Analysis calc'd. for  $\text{C}_{21}\text{H}_{21}\text{BrO}_5$ : C, 58.21; H, 4.89; Found: C, 58.31; H, 4.82.

In addition, peaks at  $\delta$  3.51 (s), 5.66-5.75 (m), 6.80 (d), 7.19-7.21 (m), and 7.31 (d) with low intensity [probably due to presence of the minor (*Z*)-isomer ( $\approx 3\%$ ) (C4-C5 double bond)] also appeared.

To understand more about broad peak at  $\delta$  4.33-5.06, we recorded  $^1\text{H}$  NMR spectrum at -40 °C.  $^1\text{H}$  NMR at -40 °C (400 MHz,  $\text{CDCl}_3$ ) :  $\delta$  1.82-2.00 (m, 2H), 2.30-2.64 (m, 4H), 3.48 & 3.73 (ABq,  $J = 15.2$  Hz, 2H)<sup>\*</sup>, 3.75 (s, 3H), 4.18-4.36 (m, 3H), 4.98 (dd,  $J = 11.6$  & 3.6 Hz, 1H), 5.53-5.65 (m, 1H), 5.96-6.09 (m, 1H), 7.03 (d,  $J = 8.4$  Hz, 1H), 7.35-7.47 (m, 2H), 7.71 (s, 1H).

<sup>\*</sup> One peak of the AB quartet merges with singlet at  $\delta$  3.75.

In addition, peaks at  $\delta$  5.70-5.80 (m), 6.85 (d), 7.18-7.21 (m), 7.36 (d) and 7.72 (s) with low intensity also appeared. These may arise due to the presence of the minor (*Z*)-isomer ( $\approx 3\%$ ) (C4-C5 double bond).

The following differences were observed between  $^1\text{H}$  NMR spectra at room temperature and at  $-40^\circ\text{C}$ .

1. Broad singlet at  $\delta$  3.62 (2H) at room temperature appeared as a AB quartet at  $\delta$  3.48 & 3.73 (2H) at  $-40^\circ\text{C}$ .

2. Broad singlet at  $\delta$  4.22 (2H) and multiplet at  $\delta$  4.33-5.06 (2H) at room temperature appeared as a multiplet at  $\delta$  4.18-4.36 (3H) and a doublet of doublet at  $\delta$  4.98 (1H) at  $-40^\circ\text{C}$ .

These differences may be attributed to the conformational changes at low temperature (rigid-conformation) and room temperature (flexible conformation).

**(4E,15E)-19-Chloro-10,10-dimethyl-2,7-dioxa-15-methoxycarbonyltricyclo[15.4.0.0<sup>8,13</sup>]-henicosane-1(17),4,8(13),15,18,20-hexaen-12-one (6f):**

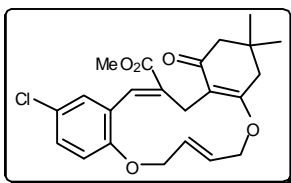

Yield: 68%; reaction time: (1h + 4h); colorless solid; mp: 114-116  $^\circ\text{C}$ ; IR (KBr) :  $\nu$  1705, 1649, 1614  $\text{cm}^{-1}$ ;  $^1\text{H}$  NMR (400 MHz,  $\text{CDCl}_3$ ) :  $\delta$  0.98 (s, 6H), 2.22 (s, 2H), 2.25 (s, 2H), 3.62 (b, 2H), 3.72 (s, 3H), 4.18 (b, 2H), 4.30-4.86 (m, 2H), 5.50-5.63 (m, 1H), 5.94-6.08 (m, 1H), 7.02 (d,  $J$  = 8.4 Hz, 1H), 7.21-7.29 (m, 1H), 7.31 (d,  $J$  = 2.0 Hz, 1H), 7.66 (s, 1H);  $^{13}\text{C}$  NMR (100 MHz,  $\text{CDCl}_3$ ) :  $\delta$  20.47, 28.41, 32.02, 39.31, 50.28, 51.93, 66.13, 75.50, 116.79, 123.74, 128.95, 129.80, 129.90, 132.71, 133.07, 133.27, 155.06, 168.89, 169.55, 196.85; LCMS (m/z) : 417 (M+H) $^+$ , 419 [(M+H) $^+$  + 2]; Analysis calc'd. for  $\text{C}_{23}\text{H}_{25}\text{ClO}_5$ : C, 66.26; H, 6.04; Found: C, 66.38; H, 6.10.

In addition, singlets at  $\delta$  1.02, 3.50, 3.70, multiplets at  $\delta$  5.61-5.72, 5.92-5.98, 7.08-7.11, 7.18-7.21 and a doublet at  $\delta$  6.87 with low intensity also appeared. These may be due to presence of the minor (*Z*)-isomer ( $\approx 2\%$ ) (C4-C5 double bond).

To understand more about broad peak at  $\delta$  4.30-4.86, we recorded  $^1\text{H}$  NMR spectra at  $-40^\circ\text{C}$ .

**$^1\text{H}$  NMR at  $-40^\circ\text{C}$  (400 MHz,  $\text{CDCl}_3$ )** :  $\delta$  0.98 (s, 3H), 1.07 (s, 3H), 2.18-2.48 (m, 4H), 3.49 & 3.72 (ABq,  $J = 15.2$  Hz, 2H)\*, 3.74 (s, 3H), 4.10-4.34 (m, 3H), 4.98 (dd,  $J = 11.6$  & 4.4 Hz, 1H), 5.51-5.65 (m, 1H), 5.98-6.11 (m, 1H), 7.09 (d,  $J = 9.2$  Hz, 1H), 7.26-7.38 (m, 2H), 7.73 (s, 1H).

\* One peak of AB quartet merges with singlet at  $\delta$  3.74.

In addition, singlets at  $\delta$  1.04, 7.74, multiplets at  $\delta$  5.70-5.80, 7.20-7.25 and a doublet at  $\delta$  6.92 with low intensity also appeared (probably due to the presence of the minor (*Z*)-isomer ( $\approx 2\%$ ) at C4-C5 double bond).

*The following differences were observed between  $^1\text{H}$  NMR spectra at room temperature and at  $-40^\circ\text{C}$ .*

- 1. Singlet at  $\delta$  0.98 (6H) at room temperature appeared as (two) singlets at  $\delta$  0.98 (3H) & 1.07 (3H) at  $-40^\circ\text{C}$ .*
- 2. Singlets at  $\delta$  2.22 (2H) & 2.25 (2H) at room temperature appeared as a multiplet at  $\delta$  2.18-2.48 (4H) at  $-40^\circ\text{C}$ .*
- 3. Broad singlet at  $\delta$  3.62 (2H) at room temperature appeared as a AB quartet at  $\delta$  3.49 & 3.72 (2H) at  $-40^\circ\text{C}$ .*
- 4. Broad singlet at  $\delta$  4.18 (2H) and multiplet at  $\delta$  4.30-4.86 (2H) at room temperature appeared as a multiplet  $\delta$  4.10-4.34 (3H) and a doublet of doublet at  $\delta$  4.98(1H) at  $-40^\circ\text{C}$ .*
- 5. Multiplet at  $\delta$  7.21-7.29 (1H) and doublet at  $\delta$  7.31 (1H) at room temperature appeared as a multiplet at  $\delta$  7.26-7.38 (2H) at  $-40^\circ\text{C}$ .*

These differences may be attributed to the conformational changes at low temperature (rigid conformation) and room temperature (flexible conformation).

**(4E,15E)-19-Chloro-2,7-dioxa-15-methoxycarbonyltricyclo[15.4.0.0<sup>8,13</sup>]henicosane-1(17),4,-8(13),15,18,20-hexaen-12-one (6g):**

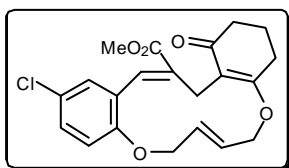

Yield: 61%; reaction time: (1h + 4h); colorless solid; mp: 158-160 °C; IR (KBr) :  $\nu$  1707, 1645, 1608  $\text{cm}^{-1}$ ;  $^1\text{H}$  NMR (400 MHz,  $\text{CDCl}_3$ ) :  $\delta$  1.83 (b, 2H), 2.30-2.52 (m, 4H), 3.62 (b, 2H), 3.73 (s, 3H), 4.22 (b, 2H), 4.32-4.90 (m, 2H), 5.52-5.65 (m, 1H), 5.95-6.08 (m, 1H), 7.02 (d,  $J = 8.4$  Hz, 1H), 7.21-7.32 (m, 2H), 7.66 (s, 1H);  $^{13}\text{C}$  NMR (100 MHz,  $\text{CDCl}_3$ ) :  $\delta$  20.63, 20.67, 25.29, 36.39, 51.86, 66.10, 75.26, 118.00, 123.50, 128.67, 129.11, 129.73, 130.02, 132.68, 132.76, 133.21, 154.94, 168.90, 171.18, 197.22; LCMS ( $m/z$ ) : 389 ( $\text{M}+\text{H}$ )<sup>+</sup>, 391 [ $(\text{M}+\text{H})^+ + 2$ ]; Analysis calc'd. for  $\text{C}_{21}\text{H}_{21}\text{ClO}_5$ : C, 64.87; H, 5.44; Found: C, 64.75; H, 5.49.

In addition, doublets at  $\delta$  6.88 & 7.08 and a multiplet at  $\delta$  7.15-7.20 with low intensity also appeared. These may be attributed to the minor (*Z*)-isomer ( $\approx 2\%$ ) (C4-C5 double bond).

To understand more about broad peak at  $\delta$  4.32-4.90, we recorded  $^1\text{H}$  NMR spectra at  $-40$  °C.

**$^1\text{H}$  NMR at  $-40$  °C (400 MHz,  $\text{CDCl}_3$ ) :**  $\delta$  1.82-1.98 (m, 2H), 2.30-2.65 (m, 4H), 3.48 & 3.73 (ABq,  $J = 14.8$  Hz, 2H)\*, 3.75 (s, 3H), 4.17-4.35 (m, 3H), 4.98 (dd,  $J = 11.6$  & 4.4 Hz, 1H), 5.56-5.65 (m, 1H), 5.96-6.09 (m, 1H), 7.08 (d,  $J = 8.4$  Hz, 1H), 7.23-7.35 (m, 2H), 7.72 (s, 1H).

\* One peak of the AB quartet merges with singlet at  $\delta$  3.75.

*The following differences were observed between  $^1\text{H}$  NMR spectra at room temperature and at  $-40$  °C.*



1. Broad singlet at  $\delta$  3.62 (2H) at room temperature appeared as a AB quartet at  $\delta$  3.48 & 3.73 (2H) at  $-40$  °C.

2. Broad singlet at  $\delta$  4.22 (2H) and multiplet at  $\delta$  4.32-4.90 (2H) at room temperature appeared as a multiplet at  $\delta$  4.17-4.35 (3H) and a doublet of doublet at  $\delta$  4.98 (1H) at  $-40$  °C.

These differences may be attributed to the conformational changes at low temperature (rigid-conformation) and room temperature (flexible conformation).

**(4E,15E)-10,10-Dimethyl-2,7-dioxa-21-methoxy-15-methoxycarbonyltricyclo[15.4.0.0<sup>8,13</sup>]-henicosane-1(17),4,8(13),15,18,20-hexaen-12-one (6h):**

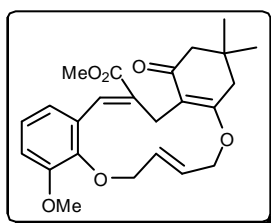

Yield: 56%; reaction time: (1h + 4h); colorless solid; mp: 134-136 °C; IR (KBr) :  $\nu$  1703, 1645, 1626  $\text{cm}^{-1}$ ;  $^1\text{H}$  NMR (400 MHz,  $\text{CDCl}_3$ ) :  $\delta$  0.91 (s, 3H), 1.04 (s, 3H), 2.12-2.38 (m, 4H), 3.57 & 3.70 (ABq,  $J = 15.6$  Hz, 2H)\*, 3.72 (s, 3H), 3.87 (s, 3H), 4.03-4.13 (m, 1H), 4.24-4.31 (m, 1H), 4.33-4.42 (m, 1H), 4.77 (dd,  $J = 12.0$  & 4.8 Hz, 1H), 5.47-5.58 (m, 1H), 6.05-6.18 (m, 1H), 6.88 (d,  $J = 8.0$  Hz, 1H), 6.96 (d,  $J = 8.0$  Hz, 1H), 7.01-7.09 (m, 1H), 7.75 (s, 1H);  $^{13}\text{C}$  NMR (100 MHz,  $\text{CDCl}_3$ ) :  $\delta$  20.63, 28.36, 28.50, 32.00, 39.33, 50.37, 51.82, 55.85, 66.28, 72.60, 112.39, 117.29, 122.16, 124.02, 128.50, 132.01, 132.45, 133.89, 134.80, 144.33, 153.08, 169.29, 169.54, 197.12; LCMS (m/z) : 413 (M+H)<sup>+</sup>; Analysis calc'd. for  $\text{C}_{24}\text{H}_{28}\text{O}_6$ : C, 69.88; H, 6.84; Found: C, 69.76; H, 6.90.

\* One peak of the AB quartet merges with singlet at  $\delta$  3.72.

**(4E,15E)-2,7-Dioxa-21-methoxy-15-methoxycarbonyltricyclo[15.4.0.0<sup>8,13</sup>]heneicosane-1(17)-4,8(13),15,18,20-hexaen-12-one (6i):**

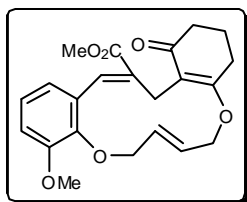

Yield: 59%; reaction time: (1h + 4h); colorless solid; mp: 150-152 °C; IR (KBr) :  $\nu$  1712, 1645, 1612  $\text{cm}^{-1}$ ;  $^1\text{H}$  NMR (400 MHz,  $\text{CDCl}_3$ ) :  $\delta$  1.73-1.96 (m, 2H), 2.21-2.54 (m, 4H), 3.55 & 3.71 (ABq,  $J = 15.6$  Hz, 2H)\*, 3.72 (s, 3H), 3.88 (s, 3H), 4.09-4.17 (m, 1H), 4.24-4.32 (m, 1H), 4.36-4.44 (m, 1H), 4.77 (dd,  $J = 12.0$  & 4.8 Hz, 1H), 5.48-5.61 (m, 1H), 6.05-6.18 (m, 1H), 6.89 (d,  $J = 8.0$  Hz, 1H), 6.93 (d,  $J = 7.6$  Hz, 1H), 6.98-7.09 (m, 1H), 7.74 (s, 1H);  $^{13}\text{C}$  NMR (100 MHz,  $\text{CDCl}_3$ ) :  $\delta$  20.67, 20.80, 25.31, 36.46, 51.67, 55.82, 66.21, 72.48, 112.33, 118.40, 122.23, 123.80, 128.57, 132.12, 132.43, 133.96, 134.72, 144.20, 153.01, 169.26, 171.18, 197.44; LCMS (m/z) : 385 (M+H)<sup>+</sup>; Analysis calc'd. for  $\text{C}_{22}\text{H}_{24}\text{O}_6$ : C, 68.74; H, 6.29; Found: C, 68.83; H, 6.22.

\* One peak of the AB quartet merges with singlet at  $\delta$  3.72.

**(4E,14E)-2,7-Dioxa-9-methoxy-15-methoxycarbonyltricyclo[15.3.0.0<sup>8,13</sup>]icosane-1(17),4-8(13),9,11,14-hexaen-18-one (6j-E):**

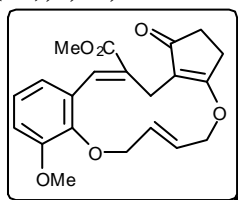

Yield: 48%; reaction time: (1h + 4h); colorless solid; mp: 110-112 °C; IR (KBr) :  $\nu$  1707, 1685, 1631  $\text{cm}^{-1}$ ;  $^1\text{H}$  NMR (400 MHz,  $\text{CDCl}_3$ ) :  $\delta$  2.07-2.25 (m, 2H), 2.32-2.44 (m, 2H), 3.51 & 3.61 (ABq  $J = 17.6$  Hz, 2H), 3.84 & 3.85 (2s, 6H), 4.31-4.50 (m, 3H), 4.77 (dd,  $J = 12.0$  & 4.0 Hz, 1H), 5.56-5.66 (m, 1H), 6.06-6.18 (m, 1H), 6.83 (dd,  $J = 8.0$  & 1.6 Hz, 1H), 6.92 (dd,  $J = 8.0$  &

1.6 Hz, 1H), 6.95-7.02 (m, 1H), 7.91 (s, 1H);  $^{13}\text{C}$  NMR (100 MHz,  $\text{CDCl}_3$ ) :  $\delta$  19.75, 24.68, 33.60, 52.32, 55.79, 66.21, 72.33, 112.55, 120.37, 121.60, 123.80, 129.10, 129.32, 131.61, 135.28, 135.49, 144.05, 152.66, 169.25, 183.27, 204.33; LCMS (m/z) : 371 (M+H) $^+$ ; Analysis calc'd. for  $\text{C}_{21}\text{H}_{22}\text{O}_6$ : C, 68.10; H, 5.99; Found: C, 68.21; H, 6.05.

**(4Z,14E)-2,7-Dioxa-9-methoxy-15-methoxycarbonyltricyclo[15.3.0.0<sup>8,13</sup>]icosane-1(17),4-8(13),9,11,14-hexaen-18-one (6j-Z):**

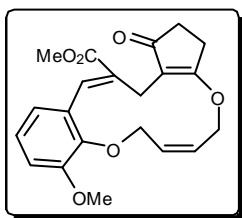

Yield: 30%; reaction time: (1h + 4h); colorless solid; mp: 150-152  $^{\circ}\text{C}$ ; IR (KBr) :  $\nu$  1705, 1693, 1631  $\text{cm}^{-1}$ ;  $^1\text{H}$  NMR (400 MHz,  $\text{CDCl}_3$ ) :  $\delta$  2.32-2.38 (m, 2H), 2.42-2.49 (m, 2H), 3.44 (s, 2H), 3.77 (s, 3H), 3.86 (s, 3H), 4.48 (bs, 2H), 4.81 (b, 2H), 5.63-5.72 (m, 1H), 6.08-6.18 (m, 1H), 6.78 (d,  $J = 7.6$  Hz, 1H) $^*$ , 6.86 (dd,  $J = 8.4$  & 1.2 Hz, 1H), 6.98-7.06 (m, 1H), 7.87 (s, 1H);  $^{13}\text{C}$  NMR (100 MHz,  $\text{CDCl}_3$ ) :  $\delta$  19.95, 24.55, 33.45, 51.98, 55.90, 64.42, 69.84, 112.04, 118.44, 122.28, 123.82, 125.11, 130.53, 130.65, 133.89, 136.19, 145.12, 153.00, 168.21, 183.48, 203.10; LCMS (m/z) : 371 (M+H) $^+$ ; Analysis calc'd. for  $\text{C}_{21}\text{H}_{22}\text{O}_6$ : C, 68.10; H, 5.99; Found: C, 68.17; H, 5.94.

\* Unresolved doublet of doublet (dd).

*Following differences were observed between  $^1\text{H}$  &  $^{13}\text{C}$  NMR spectra of (E) & (Z) isomers (this stereochemistry refers to the newly formed double bond after RCM reaction).*

*In  $^1\text{H}$  NMR spectra:*

*1. AB quartet at  $\delta$  3.51 & 3.61 (2H) of (E)-isomer appeared as a singlet at  $\delta$  3.44 (2H) in (Z)-isomer.*

2. Multiplet at  $\delta$  4.31-4.50 (3H) and doublet of doublet at  $\delta$  4.77 (1H) of (E)-isomer appeared as a (two) broad singlets at  $\delta$  4.48 (2H) & 4.81(2H) in (Z)-isomer.

In  $^{13}\text{C}$  NMR spectra:

3. Allyloxy carbons ( $\text{C}_3$  &  $\text{C}_6$ ) of (E)-isomer appeared at  $\delta$  66.21 & 72.33 where as these carbons appeared at  $\delta$  64.42 & 69.84 in (Z)-isomer.

**(4E,16E)-11,11-Dimethyl-2,8-dioxa-16-methoxycarbonyltricyclo[16.4.0.0<sup>9,14</sup>]docosane-1(18)-4,9(14),16,19,21-hexaen-13-one (6k):**

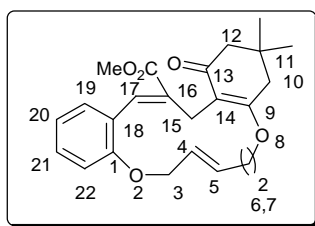

Yield: 70%; reaction time: (1h + 2h); colorless solid; mp: 120-122  $^{\circ}\text{C}$ ; IR (KBr) :  $\nu$  1716, 1641, 1606  $\text{cm}^{-1}$ ;  $^1\text{H}$  NMR (400 MHz,  $\text{CDCl}_3$ ) :  $\delta$  1.03 (s, 6H), 2.23 (s, 4H), 2.28 (s, 2H), 3.62 (s, 2H), 3.69 (s, 3H), 3.95 (t,  $J = 5.2$  Hz, 2H), 4.64 (s, 2H), 5.57-5.70 (m, 2H), 6.96-7.04 (m, 1H), 7.06 (d,  $J = 8.4$  Hz, 1H), 7.22-7.30 (m, 1H), 7.33 (d,  $J = 7.6$  Hz, 1H), 7.76 (s, 1H);  $^{13}\text{C}$  NMR (100 MHz,  $\text{CDCl}_3$ ) :  $\delta$  21.14, 28.61, 31.75, 32.02, 39.77, 49.97, 51.69, 65.56, 73.06, 116.11, 119.42, 122.50, 126.68, 129.58, 129.65, 130.68, 131.10, 132.03, 133.99, 156.93, 168.98, 169.04, 197.19; LCMS (m/z): 397 (M+H) $^{+}$ ; Analysis calc'd for  $\text{C}_{24}\text{H}_{28}\text{O}_5$  : C, 72.70; H, 7.12; Found: C, 72.59; H, 7.18.

**Crystal data for 6k:** Empirical formula,  $\text{C}_{24}\text{H}_{28}\text{O}_5$ ; Formula weight, 396.48; crystal color, colorless; habit, block; crystal dimensions, 0.48 x 0.44 x 0.40  $\text{mm}^3$ ; crystal system, triclinic; lattice type, primitive; lattice parameters,  $a = 8.4362(9)$  Å,  $b = 10.6638(12)$  Å,  $c = 12.5335(14)$  Å,  $\alpha = 76.146(2)$ ,  $\beta = 79.366(2)$ ,  $\gamma = 84.811(2)$ ;  $V = 1074.7(2)$  Å $^3$ ; space group, p-1;  $Z = 2$ ;  $D_{\text{calc}} = 1.225$  g /  $\text{cm}^3$ ;  $F_{000} = 480$ ;  $\lambda$  (Mo-K $\alpha$ ) = 0.71073 Å;  $R(I \geq 2\sigma_1) = 0.0850$ ,  $wR^2 = 0.2211$ . Detailed X-ray crystallographic data is available from the Cambridge Crystallographic Data Centre, 12 Union Road, Cambridge CB2 1EZ, UK (for compound **6k** CCDC # 917199).

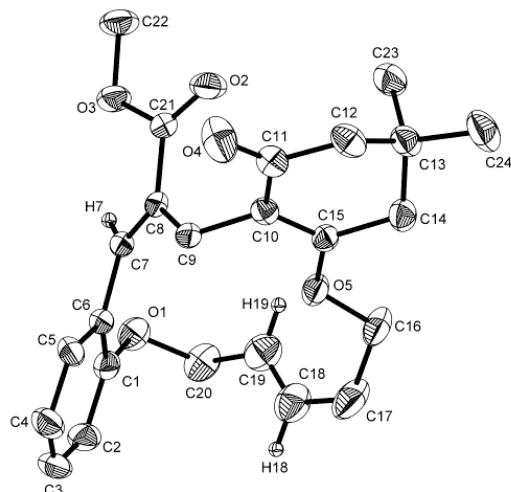

ORTEP diagram of compound **6k**

**(4E,16E)-2,8-Dioxa-16-methoxycarbonyltricyclo[16.4.0.0<sup>9,14</sup>]docosane-1(18),4,9(14),16,19-21-hexaen-13-one (6l):**

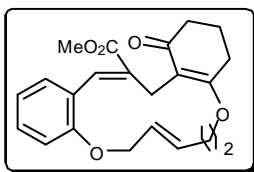

Yield: 78%; reaction time: (1h + 2h); colorless solid; mp: 144-146 °C; IR (KBr) :  $\nu$  1712, 1637, 1606  $\text{cm}^{-1}$ ;  $^1\text{H}$  NMR (400 MHz,  $\text{CDCl}_3$ ) :  $\delta$  1.84-1.94 (m, 2H), 2.19-2.27 (m, 2H), 2.35 (t,  $J = 6.8$  Hz, 2H), 2.43 (t,  $J = 6.0$  Hz, 2H), 3.60 (s, 2H), 3.70 (s, 3H), 3.96 (t,  $J = 5.2$  Hz, 2H), 4.59-4.72 (m, 2H), 5.57-5.71 (m, 2H), 6.96-7.04 (m, 1H), 7.06 (d,  $J = 8.0$  Hz, 1H), 7.22-7.29 (m, 1H), 7.31 (d,  $J = 7.6$  Hz, 1H), 7.74 (s, 1H);  $^{13}\text{C}$  NMR (100 MHz,  $\text{CDCl}_3$ ) :  $\delta$  20.76, 21.17, 25.77, 31.90, 36.16, 51.46, 65.55, 73.03, 117.25, 119.36, 122.36, 126.66, 129.50, 129.63, 130.60, 131.15, 132.12, 134.00, 156.75, 168.90, 170.71, 197.41; LCMS (m/z): 369 (M+H)<sup>+</sup>; Analysis calc'd for  $\text{C}_{22}\text{H}_{24}\text{O}_5$  : C, 71.72; H, 6.57; Found: C, 71.85; H, 6.51.

In addition, (three) doublets at  $\delta$  6.92, 7.12, 7.20 and a singlet at  $\delta$  7.65 with low intensity also appeared. These may be attributed to the minor (*Z*)-isomer ( $\approx 2\%$ ) (at C4-C5 double bond).

**(6*Z*,16*E*)-2,9-Dioxa-17-methoxycarbonyltricyclo[17.3.0.0<sup>10,15</sup>]docosane-1(19),6,10(15),11,13-16-hexaen-20-one (6m):**

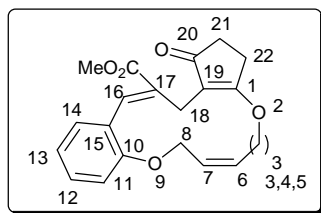

Yield: 82%; reaction time: (1h + 2h); colorless solid; mp: 124-126 °C; IR (KBr) :  $\nu$  1699, 1633  $\text{cm}^{-1}$ ;  $^1\text{H}$  NMR (400 MHz,  $\text{CDCl}_3$ ) :  $\delta$  1.60-1.72 (m, 2H), 2.24-2.30 (m, 2H), 2.38-2.50 (m, 4H), 3.39 (s, 2H), 3.75 (s, 3H), 3.97 (t,  $J = 5.2$  Hz, 2H), 4.56 (d,  $J = 4.0$  Hz, 2H), 5.62-5.78 (m, 2H), 6.85 (d,  $J = 8.4$  Hz, 1H), 6.91-7.00 (m, 1H), 7.17 (d,  $J = 7.2$  Hz, 1H), 7.20-7.28 (m, 1H), 7.85 (s, 1H);  $^{13}\text{C}$  NMR (100 MHz,  $\text{CDCl}_3$ ) :  $\delta$  20.51, 24.64, 24.78, 28.92, 33.14, 51.77, 65.88, 68.14, 112.39, 117.56, 120.85, 124.14, 125.74, 129.35, 130.15, 130.49, 134.42, 136.62, 156.20, 168.29, 183.87, 203.64; LCMS ( $m/z$ ): 369 ( $\text{M}+\text{H}$ )<sup>+</sup>; Analysis calc'd for  $\text{C}_{22}\text{H}_{24}\text{O}_5$  : C, 71.72; H, 6.57; Found: C, 71.58; H, 6.65.

**Crystal data for 6m:** Empirical formula,  $\text{C}_{22}\text{H}_{24}\text{O}_5$ ; Formula weight, 368.41; crystal color, colorless; habit, block; crystal dimensions, 0.48 x 0.44 x 0.40  $\text{mm}^3$ ; crystal system, triclinic; lattice type, primitive; lattice parameters,  $a = 8.6741(9)$  Å,  $b = 9.1126(9)$  Å,  $c = 12.8419(11)$  Å,  $\alpha = 96.627(7)$ ,  $\beta = 102.887(8)$ ,  $\gamma = 106.395(9)$ ;  $V = 931.84(15)$  Å<sup>3</sup>; space group,  $p-1$ ;  $Z = 2$ ;  $D_{\text{cald}} = 1.313$  g /  $\text{cm}^3$ ;  $F_{000} = 392$ ;  $\lambda$  (Mo-K $\alpha$ ) = 0.71073 Å;  $R(I \geq 2\sigma_1) = 0.0471$ ,  $wR^2 = 0.1214$ . Detailed X-ray crystallographic data is available from the Cambridge Crystallographic Data Centre, 12 Union Road, Cambridge CB2 1EZ, UK (for compound **6m** CCDC # 915410).

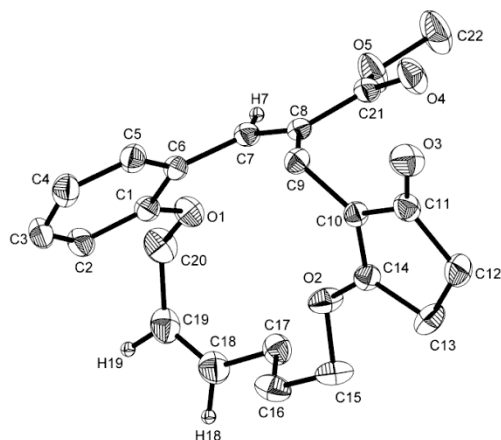

ORTEP diagram of compound **6m**

**(7Z,17E)-2,10-Dioxa-18-methoxycarbonyltricyclo[18.3.0.0<sup>11,16</sup>]tricosane-1(20),7,11(16),12-14,17-hexaen-21-one (6m):**

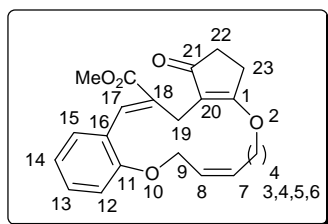

Yield: 91%; reaction time: (1h + 2h); colorless solid; mp: 152-154 °C; IR (KBr) :  $\nu$  1714, 1689, 1626  $\text{cm}^{-1}$ ;  $^1\text{H}$  NMR (400 MHz,  $\text{CDCl}_3$ ) :  $\delta$  1.44-1.52 (m, 2H), 1.60-1.68 (m, 2H), 2.08-2.16 (m, 2H), 2.23-2.30 (m, 2H), 2.35-2.42 (m, 2H), 3.46 (s, 2H), 3.74 (s, 3H), 3.91 (t,  $J = 6.0$  Hz, 2H), 4.44 (d,  $J = 6.4$  Hz, 2H), 5.86-5.98 (m, 2H), 6.84 (d,  $J = 8.8$  Hz, 1H), 6.85-6.96 (m, 1H), 7.20-7.30 (m, 2H), 7.85 (s, 1H);  $^{13}\text{C}$  NMR (100 MHz,  $\text{CDCl}_3$ ) :  $\delta$  20.23, 24.43, 24.86, 27.45, 28.85, 33.27, 51.80, 62.21, 68.44, 110.60, 117.77, 120.09, 124.04, 124.71, 129.12, 129.60, 130.46, 135.53, 138.03, 156.50, 168.74, 183.80, 203.64; LCMS ( $m/z$ ): 383 ( $\text{M}+\text{H}$ )<sup>+</sup>; Analysis calcd for  $\text{C}_{23}\text{H}_{26}\text{O}_5$  : C, 72.23; H, 6.85; Found: C, 72.38; H, 6.79.

In addition, (three) singlets at  $\delta$  3.41, 3.76, 7.90, a doublet at  $\delta$  4.60 and a multiplet at  $\delta$  5.60-5.81 with low intensity also appeared. These may arise due to the presence of minor (*Z*)-isomer ( $\approx 2\%$ ) (C7-C8 double bond).

**Crystal data for 6n:** Empirical formula,  $C_{23}H_{26}O_5$ ; Formula weight, 382.44; crystal color, colorless; habit, block; crystal dimensions,  $0.36 \times 0.28 \times 0.24 \text{ mm}^3$ ; crystal system, monoclinic; lattice type, primitive; lattice parameters,  $a = 12.4423(16) \text{ \AA}$ ,  $b = 12.3999(16) \text{ \AA}$ ,  $c = 13.5967(18) \text{ \AA}$ ,  $\alpha = 90.00$ ,  $\beta = 97.190(2)$ ,  $\gamma = 90.00$ ;  $V = 2081.2(5) \text{ \AA}^3$ ; space group,  $p2(1)/n$ ;  $Z = 4$ ;  $D_{\text{calc}} = 1.221 \text{ g / cm}^3$ ;  $F_{000} = 816$ ;  $\lambda (\text{Mo-K}\alpha) = 0.71073 \text{ \AA}$ ;  $R(I \geq 2\sigma_1) = 0.0662$ ,  $wR^2 = 0.2083$ . Detailed X-ray crystallographic data is available from the Cambridge Crystallographic Data Centre, 12 Union Road, Cambridge CB2 1EZ, UK (for compound **6n** CCDC # 917200).

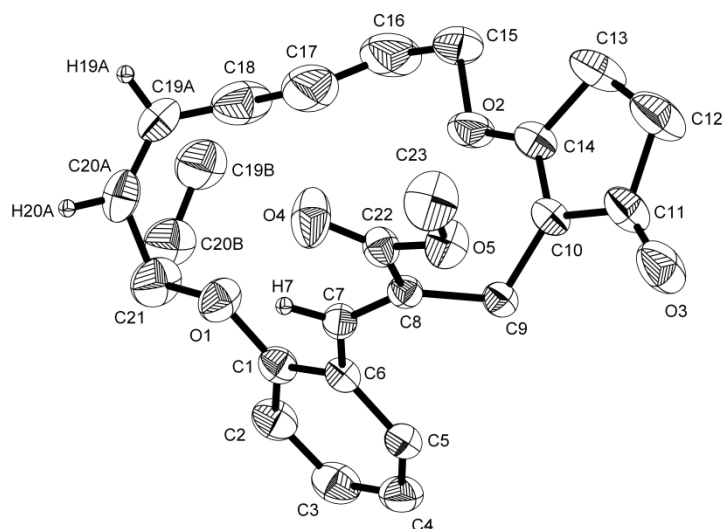

ORTEP diagram of compound **6n**

Each of carbons, C19 and C20, exhibit disorder, they are modeled using two positions of 0.6 and 0.4 occupancy each.

**(11E,21E)-2,14-Dioxa-22-methoxycarbonyltricyclo[22.3.0.0<sup>15,20</sup>]heptacosane-1(24),11-15(20),16,18,21-hexaen-25-one (6o):**

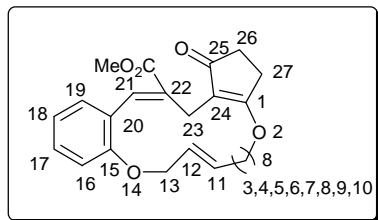

Yield: 85%; reaction time: (1h + 2h); colorless solid; mp:  $107-108 \text{ }^\circ\text{C}$ ; IR (KBr) :  $\nu$  1711, 1680,  $1624 \text{ cm}^{-1}$ ;  $^1\text{H NMR}$  (400 MHz,  $\text{CDCl}_3$ ) :  $\delta$  1.09-1.35 (m, 8H), 1.34-1.42 (m, 2H), 1.50-1.62 (m, 2H), 2.09-2.15 (m, 2H), 2.35-2.43 (m, 2H), 2.54-2.62 (m, 2H), 3.39 (s, 2H), 3.78 (s, 3H), 4.02 (t,



$J = 5.2$  Hz, 2H), 4.56 (d,  $J = 5.6$  Hz, 2H), 5.62-5.80 (m, 2H), 6.87-6.98 (m, 2H), 7.20-7.30 (m, 1H), 7.34 (d,  $J = 6.8$  Hz, 1H), 7.93 (s, 1H);  $^{13}\text{C}$  NMR (100 MHz,  $\text{CDCl}_3$ ):  $\delta$  21.59, 24.89, 25.55, 26.78, 27.79, 28.59, 29.38, 29.85, 31.44, 33.24, 51.88, 69.41, 69.67, 113.67, 117.90, 120.71, 125.30, 125.88, 129.47, 129.62, 130.17, 134.57, 135.71, 156.66, 168.85, 183.99, 204.02; LCMS (m/z): 439 (M+H) $^+$ ; Analysis calc'd for  $\text{C}_{27}\text{H}_{34}\text{O}_5$ : C, 73.94; H, 7.81; Found: C, 73.85; H, 7.78.

**Crystal data for 6o:** Empirical formula,  $\text{C}_{27}\text{H}_{34}\text{O}_5$ ; Formula weight, 438.54; crystal color, colorless; habit, block; crystal dimensions, 0.48 x 0.40 x 0.20 mm $^3$ ; crystal system, monoclinic; lattice type, primitive; lattice parameters,  $a = 12.518(2)$  Å,  $b = 8.3814(13)$  Å,  $c = 23.699(4)$  Å,  $\alpha = 90.00$ ,  $\beta = 103.330(3)$ ,  $\gamma = 90.00$ ;  $V = 2419.5(7)$  Å $^3$ ; space group,  $p2(1)/c$ ;  $Z = 4$ ;  $D_{\text{calc}} = 1.204$  g / cm $^3$ ;  $F_{000} = 944$ ;  $\lambda$  (Mo-K $\alpha$ ) = 0.71073 Å;  $R(I \geq 2\sigma_1) = 0.0828$ ,  $wR^2 = 0.2250$ . Detailed X-ray crystallographic data is available from the Cambridge Crystallographic Data Centre, 12 Union Road, Cambridge CB2 1EZ, UK (for compound **6o** CCDC # 915411).

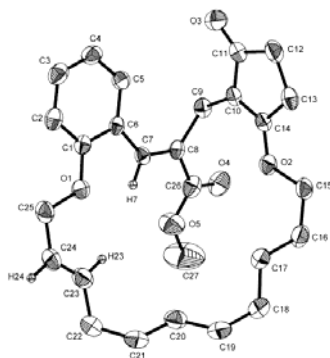

ORTEP diagram of compound **6o**

*In the compounds 7a-E-7e-E/7a-Z-7e-Z, stereochemistry refers to the newly formed double bond after RCM reaction.*

**(4E,15E)-10,10-Dimethyl-2,7-dioxa-15-methoxycarbonyltricyclo[15.3.1.0 $^{8,13}$ ]henicosane-1(21),4,8(13),15,17,19-hexaen-12-one (7a-E):**

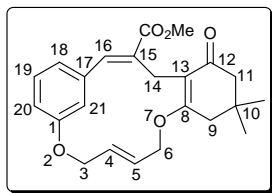

Yield: 56%; reaction time: (1h + 4h); colorless solid; mp: 170-172 °C; IR (KBr):  $\nu$  1705, 1651, 1610  $\text{cm}^{-1}$ ;  $^1\text{H}$  NMR (400 MHz,  $\text{CDCl}_3$ ):  $\delta$  0.96 (s, 6H), 2.08 (s, 2H), 2.27 (s, 2H), 3.43 (s, 2H), 3.79 (s, 3H), 4.43 (d,  $J = 7.2$  Hz, 2H), 4.60-4.68 (m, 2H), 5.68-5.78 (m, 1H), 5.80-5.90 (m, 1H), 6.67 (s, 1H)\*, 6.79 (d,  $J = 7.6$  Hz, 1H), 6.88 (dd,  $J = 8.0$  & 2.4 Hz, 1H), 7.19-7.25 (m, 1H), 7.56 (s, 1H);  $^{13}\text{C}$  NMR (100 MHz,  $\text{CDCl}_3$ ):  $\delta$  21.79, 28.36, 32.03, 39.95, 50.63, 51.94, 66.97, 69.03, 117.05, 118.35, 118.99, 122.93, 129.15, 129.54, 132.31, 132.65, 137.07, 137.13, 157.06, 168.48, 169.25, 197.22; LCMS (m/z): 383 (M+H) $^+$ ; Analysis calc'd. for  $\text{C}_{23}\text{H}_{26}\text{O}_5$ : C, 72.23; H, 6.85; Found : C, 72.15; H, 6.91.

\* Unresolved doublet.

**Crystal data for 7a-E:** Empirical formula,  $\text{C}_{23}\text{H}_{26}\text{O}_5$ ; Formula weight, 382.44; crystal color, colorless; habit, block; crystal dimensions, 0.28 x 0.18 x 0.10  $\text{mm}^3$ ; crystal system, orthorhombic; lattice type, primitive; lattice parameters,  $a = 12.1101(10)$  Å,  $b = 12.3001(10)$  Å,  $c = 13.4920(11)$  Å,  $\alpha = 90.00$ ,  $\beta = 90.00$ ,  $\gamma = 90.00$ ;  $V = 2009.7(3)$  Å $^3$ ; space group,  $p2(1)p2(1)p2(1)$ ;  $Z = 4$ ;  $D_{\text{calcd}} = 1.264$  g /  $\text{cm}^3$ ;  $F_{000} = 816$ ;  $\lambda$  (Mo-K $\alpha$ ) = 0.71073 Å;  $R(I \geq 2\sigma_1) = 0.0631$ ,  $wR^2 = 0.1395$ . Detailed X-ray crystallographic data is available from the Cambridge Crystallographic Data Centre, 12 Union Road, Cambridge CB2 1EZ, UK (for compound **7a-E** CCDC # 915412).

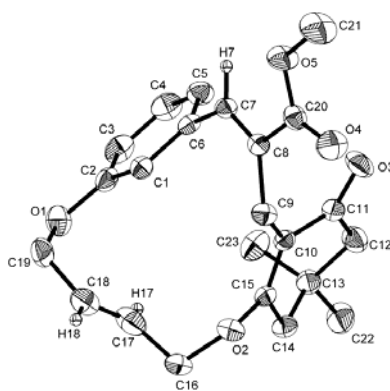

ORTEP diagram of compound **7a-E**

**(4Z,15E)-10,10-Dimethyl-2,7-dioxa-15-methoxycarbonyltricyclo[15.3.1.0<sup>8,13</sup>]henicosane-1(21),4,8(13),15,17,19-hexaen-12-one (7a-Z):**

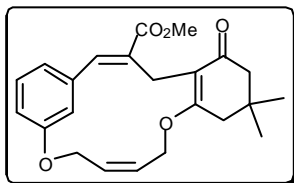

Yield: 27%; reaction time: (1h + 4h); colorless solid; mp: 162-164 °C; IR (KBr):  $\nu$  1709, 1649, 1622  $\text{cm}^{-1}$ ;  $^1\text{H}$  NMR (400 MHz,  $\text{CDCl}_3$ ):  $\delta$  1.01 (s, 6H), 2.18 (s, 2H), 2.33 (s, 2H), 3.53 (s, 2H), 3.76 (s, 3H), 4.59-4.68 (m, 2H), 4.82-4.92 (m, 2H), 5.82-5.94 (m, 2H), 6.79 (d,  $J = 7.6$  Hz, 1H), 6.85 (dd,  $J = 8.0$  & 1.6 Hz, 1H), 7.18-7.25 (m, 1H), 7.39 (s, 1H), 7.53 (s, 1H);  $^{13}\text{C}$  NMR (100 MHz,  $\text{CDCl}_3$ ):  $\delta$  21.14, 28.43, 31.99, 39.89, 50.24, 51.99, 61.83, 65.14, 113.60, 117.55, 117.83, 122.70, 125.63, 129.38, 132.84, 134.07, 137.66, 158.00, 168.51, 169.12, 197.35; LCMS (m/z): 383 (M+H)<sup>+</sup>; Analysis calc'd. for  $\text{C}_{23}\text{H}_{26}\text{O}_5$ : C, 72.23; H, 6.85; Found : C, 72.36; H, 6.79.

*Following differences were observed between  $^1\text{H}$  &  $^{13}\text{C}$  NMR spectra of (E)- & (Z)- isomers.*

*In  $^1\text{H}$  NMR spectra:*

- 1. Multiplets at  $\delta$  5.68-5.78 (1H) and 5.80-5.90 (1H) of (E)-isomer appeared as one multiplet at  $\delta$  5.82-5.94 (2H) in (Z)-isomer.*
- 2. Singlet at  $\delta$  6.67 (1H) of (E)-isomer appeared as a singlet at  $\delta$  7.39 (1H) in (Z)-isomer.*

*In  $^{13}\text{C}$  NMR spectra:*

- 3. Allyloxy carbons ( $\text{C}_3$  &  $\text{C}_6$ ) of (E)-isomer appeared at  $\delta$  66.97 & 69.03 where as these carbons appeared at  $\delta$  61.83 & 65.14 in (Z)-isomer.*

**Crystal data for 7a-Z:** Empirical formula,  $\text{C}_{23}\text{H}_{26}\text{O}_5$ ; Formula weight, 382.44; crystal color, colorless; habit, block; crystal dimensions, 0.40 x 0.36 x 0.30  $\text{mm}^3$ ; crystal system, monoclinic; lattice type, primitive; lattice parameters,  $a = 25.1535(18)$  Å,  $b = 8.7953(6)$  Å,  $c = 36.307(3)$  Å,  $\alpha = 90.00$ ,  $\beta = 96.4190(10)$ ,  $\gamma = 90.00$ ;  $V = 7982.0(10)$  Å<sup>3</sup>; space group,  $c2/c$ ;  $Z = 16$ ;  $D_{\text{cald}} = 1.273$  g /  $\text{cm}^3$ ;  $F_{000} = 3264$ ;  $\lambda$  (Mo-K $\alpha$ ) = 0.71073 Å;  $R(I \geq 2\sigma_1) = 0.0595$ ,  $wR^2 = 0.1482$ . Detailed X-ray

crystallographic data is available from the Cambridge Crystallographic Data Centre, 12 Union Road, Cambridge CB2 1EZ, UK (for compound **7a-Z** CCDC # 917201).

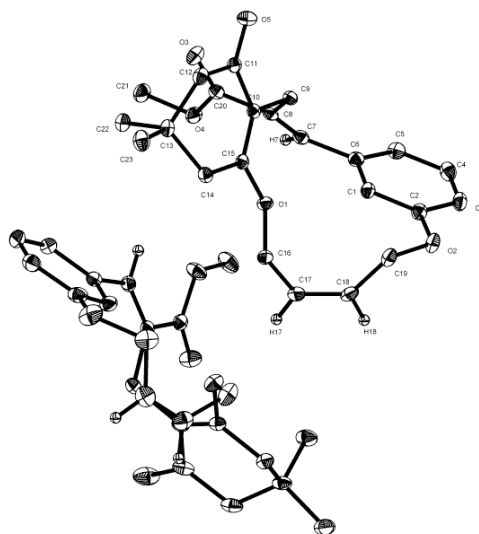

ORTEP diagram of compound **7a-Z**

**(4E,15E)-2,7-Dioxa-15-methoxycarbonyltricyclo[15.3.1.0<sup>8,13</sup>]henicosane-1(21),4,8(13),15,17-19-hexaen-12-one (7b-E):**

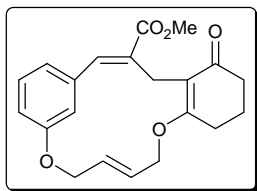

Yield: 58%; reaction time: (1h + 4h); colorless solid; mp: 126-128 °C; IR (KBr):  $\nu$  1707, 1647, 1608  $\text{cm}^{-1}$ ;  $^1\text{H}$  NMR (400 MHz,  $\text{CDCl}_3$ ):  $\delta$  1.71-1.82 (m, 2H), 2.19 (t,  $J = 6.4$  Hz, 2H), 2.40 (t,  $J = 6.0$  Hz, 2H), 3.43 (s, 2H), 3.80 (s, 3H), 4.45 (d,  $J = 7.2$  Hz, 2H), 4.64 (d,  $J = 4.4$  Hz, 2H), 5.68-5.79 (m, 1H), 5.80-5.89 (m, 1H), 6.62 (s, 1H), 6.77 (d,  $J = 7.6$  Hz, 1H), 6.88 (dd,  $J = 8.0$  & 2.0 Hz, 1H), 7.18-7.25 (m, 1H), 7.56 (s, 1H);  $^{13}\text{C}$  NMR (100 MHz,  $\text{CDCl}_3$ ):  $\delta$  20.59, 22.17, 25.87, 36.80, 51.98, 66.88, 68.75, 116.89, 118.16, 120.52, 122.64, 129.15, 129.55, 132.28, 132.66, 137.07, 137.29, 156.94, 169.29, 170.34, 197.47; LCMS ( $m/z$ ): 355 ( $\text{M}+\text{H}$ )<sup>+</sup>; Analysis calc'd. for  $\text{C}_{21}\text{H}_{22}\text{O}_5$ : C, 71.17; H, 6.26; Found: C, 71.08; H, 6.31.

**(4Z,15E)-2,7-Dioxa-15-methoxycarbonyltricyclo[15.3.1.0<sup>8,13</sup>]henicosane-1(21),4,8(13),15,17-19-hexaen-12-one (7b-Z):**

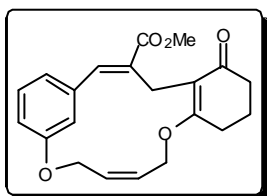

Yield: 32%; reaction time: (1h + 4h); colorless solid; mp: 130-132 °C; IR (KBr):  $\nu$  1718, 1655, 1602  $\text{cm}^{-1}$ ;  $^1\text{H}$  NMR (400 MHz,  $\text{CDCl}_3$ ):  $\delta$  1.82-1.92 (m, 2H), 2.28 (t,  $J = 6.4$  Hz, 2H), 2.45 (t,  $J = 6.0$  Hz, 2H), 3.53 (s, 2H), 3.78 (s, 3H), 4.58-4.68 (m, 2H), 4.82-4.92 (m, 2H), 5.82-5.94 (m, 2H), 6.78 (d,  $J = 7.6$  Hz, 1H), 6.85 (dd,  $J = 8.0$  & 2.0 Hz, 1H), 7.18-7.25 (m, 1H), 7.32 (s, 1H), 7.51 (s, 1H);  $^{13}\text{C}$  NMR (100 MHz,  $\text{CDCl}_3$ ):  $\delta$  20.90, 21.34, 25.93, 36.45, 51.97, 62.03, 65.50, 113.83, 117.49, 118.60, 122.66, 125.49, 129.31, 132.99, 134.10, 137.46, 137.77, 157.99, 169.19, 170.35, 197.63; LCMS ( $m/z$ ): 355 ( $\text{M}+\text{H}$ )<sup>+</sup>; Analysis calc'd. for  $\text{C}_{21}\text{H}_{22}\text{O}_5$  : C, 71.17; H, 6.26; Found : C, 71.36; H, 6.19.

*Following differences were observed between  $^1\text{H}$  &  $^{13}\text{C}$  NMR spectra of (E)- & (Z)- isomers.*

*In  $^1\text{H}$  NMR spectra:*

- 1. Multiplets at  $\delta$  5.68-5.79 (1H) and 5.80-5.89 (1H) of (E)-isomer appeared as one multiplet at  $\delta$  5.82-5.94 (2H) in (Z)-isomer.*
- 2. Singlet at  $\delta$  6.62 (1H) of (E)-isomer appeared as a singlet at  $\delta$  7.32 (1H) in (Z)-isomer.*

*In  $^{13}\text{C}$  NMR spectra*

- 3. Allyloxy carbons ( $\text{C}_3$  &  $\text{C}_6$ ) of (E)-isomer appeared at  $\delta$  66.88 & 68.75 where as these carbons appeared at  $\delta$  62.03 & 65.50 in (Z)-isomer.*

**(4E,14E)-2,7-Dioxa-14-methoxycarbonyltricyclo[14.3.1.0<sup>8,12</sup>]icosane-1(20),4,8(12),14,16,18-hexaen-11-one (7c-E):**

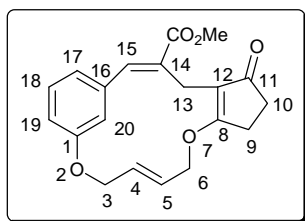

Yield: 48%; reaction time: (1h + 4h); colorless solid; mp: 116-118 °C; IR (KBr):  $\nu$  1716, 1687, 1624  $\text{cm}^{-1}$ ;  $^1\text{H}$  NMR (400 MHz,  $\text{CDCl}_3$ ):  $\delta$  2.36-2.42 (m, 2H), 2.52-2.60 (m, 2H), 3.29 (s, 2H), 3.84 (s, 3H), 4.56-4.67 (m, 4H), 5.74-5.94 (m, 2H), 6.57 (s, 1H), 6.85 (d,  $J = 7.2$  Hz, 1H), 6.92 (dd,  $J = 8.0$  & 2.4 Hz, 1H), 7.21-7.28 (m, 1H), 7.65 (s, 1H);  $^{13}\text{C}$  NMR (100 MHz,  $\text{CDCl}_3$ ):  $\delta$  21.52, 25.25, 33.85, 52.07, 68.28, 69.51, 117.33, 118.95, 121.82, 123.05, 127.95, 129.30, 130.92, 132.15, 136.99, 138.45, 157.34, 168.96, 183.03, 204.10; LCMS ( $m/z$ ): 341 ( $\text{M}+\text{H}$ )<sup>+</sup>; Analysis calc'd. for  $\text{C}_{20}\text{H}_{20}\text{O}_5$ : C, 70.57; H, 5.92; Found: C, 70.68; H, 5.88.

**(4Z,14E)-2,7-Dioxa-14-methoxycarbonyltricyclo[14.3.1.0<sup>8,12</sup>]icosane-1(20),4,8(12),14,16,18-hexaen-11-one (7c-Z):**

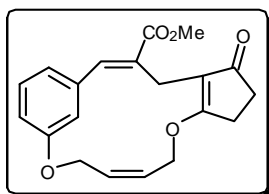

Yield: 31%; reaction time: (1h + 4h); colorless solid; mp: 146-148 °C; IR (KBr):  $\nu$  1716, 1685, 1630  $\text{cm}^{-1}$ ;  $^1\text{H}$  NMR (400 MHz,  $\text{CDCl}_3$ ):  $\delta$  2.45-2.52 (m, 2H), 2.67-2.73 (m, 2H), 3.40 (s, 2H), 3.78 (s, 3H), 4.73 (d,  $J = 6.4$  Hz, 2H), 4.96 (d,  $J = 4.8$  Hz, 2H), 5.86-6.00 (m, 2H), 6.84-6.92 (m, 2H), 7.23-7.32 (m, 1H), 7.63 (s, 1H), 7.69 (s, 1H);  $^{13}\text{C}$  NMR (100 MHz,  $\text{CDCl}_3$ ):  $\delta$  20.65, 24.78, 33.59, 52.06, 63.47, 64.74, 113.36, 117.62, 119.29, 123.21, 123.61, 129.59, 130.56, 136.93,

137.12, 139.29, 158.01, 168.87, 182.86, 203.40; LCMS (m/z): 341 (M+H)<sup>+</sup>; Analysis calc'd. for C<sub>20</sub>H<sub>20</sub>O<sub>5</sub> : C, 70.57; H, 5.92; Found : C, 70.45; H, 5.88.

Following differences were observed between <sup>1</sup>H & <sup>13</sup>C NMR spectra of (E)- & (Z)- isomers.

1. Singlet at δ 6.57 (1H) of (E)-isomer appeared as a singlet at δ 7.63 (1H) in (Z)-isomer in <sup>1</sup>H NMR spectra .

2. Allyloxy carbons (C<sub>3</sub> & C<sub>6</sub>) of (E)-isomer appeared at δ 68.28 & 69.51 where as these carbons appeared at δ 63.47 & 64.74 in (Z)-isomer in <sup>13</sup>C NMR spectra.

**(4E,15E)-2,7-Dioxa-20-methoxy-15-methoxycarbonyltricyclo[15.3.1.0<sup>8,13</sup>]henicosane-1(21)-4,8(13),15,17,19-hexaen-12-one (7d-E):**

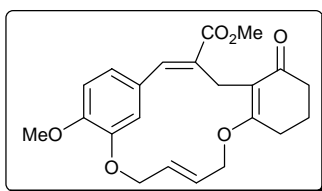

Yield: 53%; reaction time: (1h + 4h); colorless solid; mp: 112-114 °C; IR (KBr): ν 1701, 1651, 1606 cm<sup>-1</sup>; <sup>1</sup>H NMR (400 MHz, CDCl<sub>3</sub>): δ 1.79-1.89 (m, 2H), 2.24 (t, J = 6.8 Hz, 2H), 2.45 (t, J = 6.0 Hz, 2H), 3.44 (s, 2H), 3.79 (s, 3H), 3.89 (s, 3H), 4.47 (d, J = 7.2 Hz, 2H), 4.63 (d, J = 4.8 Hz, 2H), 5.65-5.78 (m, 1H), 5.84-5.96 (m, 1H), 6.72 (d, J = 1.6 Hz, 1H), 6.80-6.90 (m, 2H), 7.50 (s, 1H); <sup>13</sup>C NMR (100 MHz, CDCl<sub>3</sub>): δ 20.72, 22.12, 25.98, 36.90, 51.89, 55.89, 66.86, 69.42, 111.29, 119.92, 120.60, 124.40, 128.71, 129.84, 131.56, 132.31, 136.86, 145.54, 150.15, 169.52, 170.44, 197.43; LCMS (m/z): 385 (M+H)<sup>+</sup>; Analysis calc'd. for C<sub>22</sub>H<sub>24</sub>O<sub>6</sub> : C, 68.74; H, 6.29; Found : C, 68.61; H, 6.22.

In addition, peaks at δ 1.90-1.95 (m), 2.32 (t), 2.51 (t), 3.59 (s), 3.76 (s), 4.96 (d), 7.47 (s) and 7.56 (d) also appeared with low intensity. These may arise due to the presence minor (Z)-isomeric (≈ 5 %).

**(4Z,15E)-2,7-Dioxa-20-methoxy-15-methoxycarbonyltricyclo[15.3.1.0<sup>8,13</sup>]henicosane-1(21)-4,8(13),15,17,19-hexaen-12-one (7d-Z):**

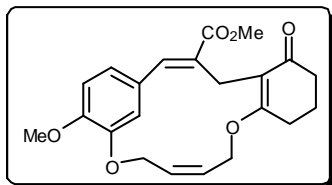

Yield: 33%; reaction time: (1h + 4h); colorless solid; mp: 124-126 °C; IR (KBr):  $\nu$  1701, 1649, 1618  $\text{cm}^{-1}$ ;  $^1\text{H}$  NMR (400 MHz,  $\text{CDCl}_3$ ):  $\delta$  1.89-1.98 (m, 2H), 2.32 (t,  $J = 6.0$  Hz, 2H), 2.52 (t,  $J = 6.0$  Hz, 2H), 3.59 (s, 2H), 3.76 (s, 3H), 3.89 (s, 3H), 4.61-4.66 (m, 2H), 4.89-5.01 (m, 2H), 5.85-6.00 (m, 2H), 6.78-6.90 (m, 2H), 7.47 (s, 1H), 7.52 (d,  $J = 1.2$  Hz, 1H);  $^{13}\text{C}$  NMR (100 MHz,  $\text{CDCl}_3$ ):  $\delta$  20.93, 21.29, 26.06, 36.58, 51.89, 55.96, 61.97, 65.82, 111.26, 114.43, 118.91, 124.16, 125.37, 128.98, 131.06, 134.68, 137.41, 146.95, 149.36, 169.45, 170.06, 197.73; LCMS (m/z): 385 ( $\text{M}+\text{H}$ )<sup>+</sup>; Analysis calc'd. for  $\text{C}_{22}\text{H}_{24}\text{O}_6$ : C, 68.74; H, 6.29; Found: C, 68.88; H, 6.21.

In addition, peaks with low intensity appeared at  $\delta$  1.80-1.89 (m), 2.22 (t), 2.49 (t), 3.44 (s), 3.80 (s), 4.48 (d) and 7.51 (s) probably due to the presence of minor (*E*)-isomer ( $\approx 4\%$ ).

Following differences were observed between  $^1\text{H}$  &  $^{13}\text{C}$  NMR spectra of (*E*)- & (*Z*)- isomers.

In  $^1\text{H}$  NMR spectra:

1. Multiplets at  $\delta$  5.65-5.78 (1H) and 5.84-5.96 (1H) of (*E*)-isomer appeared as a single multiplet at  $\delta$  5.85-6.00 (2H) in (*Z*)-isomer.
2. Doublet at  $\delta$  6.72 (1H) of (*E*)-isomer appeared as a doublet at  $\delta$  7.52 (1H) in (*Z*)-isomer.

In  $^{13}\text{C}$  NMR spectra

3. Allyloxy carbons ( $\text{C}_3$  &  $\text{C}_6$ ) of (*E*)-isomer appeared at  $\delta$  66.86 & 69.42 where as these carbons appeared at  $\delta$  61.97 & 65.82 in (*Z*)-isomer.



**(4E,14E)-2,7-Dioxa-19-methoxy-14-methoxycarbonyltricyclo[14.3.1.0<sup>8,12</sup>]icosane-1(20),4-8(12),14,16,18-hexaen-11-one (7e-E):**

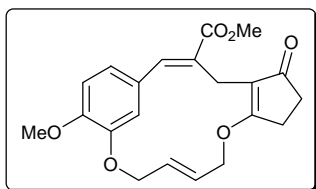

Yield: 48%; reaction time: (1h + 4h); colorless solid; mp: 150-152 °C; IR (KBr):  $\nu$  1718, 1682, 1616  $\text{cm}^{-1}$ ;  $^1\text{H}$  NMR (400 MHz,  $\text{CDCl}_3$ ):  $\delta$  2.39-2.44 (m, 2H), 2.55-2.61 (m, 2H), 3.32 (s, 2H), 3.83 (s, 3H), 3.89 (s, 3H), 4.58-4.68 (m, 4H), 5.74-5.86 (m, 1H), 5.92-6.04 (m, 1H), 6.67 (d,  $J$  = 1.6 Hz, 1H), 6.85-6.94 (m, 2H), 7.61 (s, 1H);  $^{13}\text{C}$  NMR (100 MHz,  $\text{CDCl}_3$ ):  $\delta$  21.61, 25.22, 33.86, 51.99, 55.83, 68.09, 70.15, 111.48, 120.62, 121.35, 124.82, 128.35, 128.42, 129.53, 131.75, 138.24, 145.71, 150.79, 169.12, 182.98, 203.94; LCMS ( $m/z$ ): 371 ( $\text{M}+\text{H}$ )<sup>+</sup>; Analysis calc'd. for  $\text{C}_{21}\text{H}_{22}\text{O}_6$ : C, 68.10; H, 5.99; Found: C, 68.25; H, 6.05.

**(4Z,14E)-2,7-Dioxa-19-methoxy-14-methoxycarbonyltricyclo[14.3.1.0<sup>8,12</sup>]icosane-1(20),4-8(12),14,16,18-hexaen-11-one (7e-Z):**

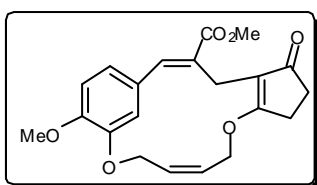

Yield: 28%; reaction time: (1h + 4h); colorless solid; mp: 184-186 °C; IR (KBr):  $\nu$  1701, 1680, 1624  $\text{cm}^{-1}$ ;  $^1\text{H}$  NMR (400 MHz,  $\text{CDCl}_3$ ):  $\delta$  2.45-2.52 (m, 2H), 2.67-2.74 (m, 2H), 3.44 (s, 2H), 3.77 (s, 3H), 3.91 (s, 3H), 4.73 (d,  $J$  = 6.4 Hz, 2H), 5.07 (d,  $J$  = 5.2 Hz, 2H), 5.86-6.04 (m, 2H), 6.88 (s, 2H), 7.59 (s, 1H), 7.79 (s, 1H);  $^{13}\text{C}$  NMR (100 MHz,  $\text{CDCl}_3$ ):  $\delta$  20.54, 24.72, 33.59, 51.94, 55.92, 63.41, 65.22, 111.21, 113.57, 119.31, 123.53, 124.43, 128.29, 128.53, 137.23,

139.11, 146.92, 149.27, 169.08, 182.69, 203.39; LCMS (m/z): 371 (M+H)<sup>+</sup>; Analysis calc'd. for C<sub>21</sub>H<sub>22</sub>O<sub>6</sub>: C, 68.10; H, 5.99; Found: C, 68.21; H, 5.91.

Following differences were observed between <sup>1</sup>H & <sup>13</sup>C NMR spectra of (E)- & (Z)- isomers.

In <sup>1</sup>H NMR spectra:

1. Multiplets at δ 5.74-5.86 (1H) and 5.92-6.04 (1H) of (E)-isomer appeared as one multiplet at δ 5.86-6.04 (2H) in (Z)-isomer.

2. Doublet at δ 6.67 (1H) of (E)-isomer appeared as a singlet at δ 7.59 (1H) in (Z)-isomer.

In <sup>13</sup>C NMR spectra:

3. Allyloxy carbons (C<sub>3</sub> & C<sub>6</sub>) of (E)-isomer appeared at δ 68.09 & 70.15 where as these carbons appeared at δ 63.41 & 65.22 in (Z)-isomer.

**(4E,16E)-11,11-Dimethyl-2,8-dioxa-16-methoxycarbonyltricyclo[16.3.1.0<sup>9,14</sup>]docosane-1(22)-4,9(14),16,18,20-hexaen-13-one (7f):**

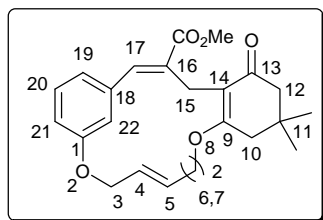

Yield: 70%; reaction time: (1h + 2h); colorless solid; mp: 102-104 °C; IR (KBr): ν 1709, 1641, 1616 cm<sup>-1</sup>; <sup>1</sup>H NMR (400 MHz, CDCl<sub>3</sub>): δ 0.96 (s, 6H), 2.11 (s, 2H), 2.23 (s, 2H), 2.35-2.46 (m, 2H), 3.57 (s, 2H), 3.83 (s, 3H), 3.91 (t, J = 5.2 Hz, 2H), 4.64 (d, J = 1.2 Hz, 2H), 5.55-5.64 (m, 1H), 5.65-5.74 (m, 1H), 6.72 (d, J = 7.2 Hz, 1H), 6.84 (d, J = 8.4 Hz, 1H)<sup>\*</sup>, 6.95 (s, 1H), 7.14-7.22 (m, 1H), 7.43 (s, 1H); <sup>13</sup>C NMR (100 MHz, CDCl<sub>3</sub>): δ 20.47, 28.45, 31.90, 32.59, 39.22, 50.32, 52.06, 66.60, 67.44, 114.15, 115.89, 117.45, 122.36, 127.60, 129.12, 130.18, 133.51, 136.28, 137.55, 157.46, 168.87, 169.73, 197.36; LCMS (m/z): 397 (M+H)<sup>+</sup>; Analysis calc'd. for C<sub>24</sub>H<sub>28</sub>O<sub>5</sub>: C, 72.70; H, 7.12; Found: C, 72.81; H, 7.08.

\* Unresolved doublet of doublet (dd).

**(4E,16E)-2,8-Dioxa-16-methoxycarbonyltricyclo[16.3.1.0<sup>9,14</sup>]docosane-1(22),4,9(14),16,18-20-hexaen-13-one (7g):**

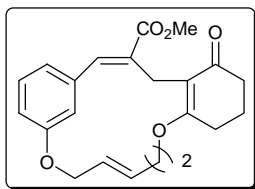

Yield: 79%; reaction time: (1h + 2h); colorless solid; mp: 120-122 °C; IR (KBr):  $\nu$  1699, 1641, 1606  $\text{cm}^{-1}$ ;  $^1\text{H}$  NMR (400 MHz,  $\text{CDCl}_3$ ):  $\delta$  1.78-1.88 (m, 2H), 2.23 (t,  $J = 6.0$  Hz, 2H), 2.34-2.43 (m, 4H), 3.55 (s, 2H), 3.84 (s, 3H), 3.92 (t,  $J = 5.2$  Hz, 2H), 4.64 (d,  $J = 2.8$  Hz, 2H), 5.55-5.64 (m, 1H), 5.65-5.73 (m, 1H), 6.72 (d,  $J = 7.2$  Hz, 1H), 6.84 (dd,  $J = 8.0$  & 2.4 Hz, 1H), 6.90 (s, 1H), 7.15-7.21 (m, 1H), 7.42 (s, 1H);  $^{13}\text{C}$  NMR (100 MHz,  $\text{CDCl}_3$ ):  $\delta$  20.72, 20.77, 25.31, 32.47, 36.49, 51.97, 66.57, 67.50, 114.21, 116.98, 117.40, 122.24, 127.64, 129.04, 130.10, 133.59, 136.17, 137.60, 157.44, 169.73, 170.70, 197.58; LCMS ( $m/z$ ): 369 ( $\text{M}+\text{H}$ )<sup>+</sup>; Analysis calc'd. for  $\text{C}_{22}\text{H}_{24}\text{O}_5$ : C, 71.72; H, 6.57; Found: C, 71.63; H, 6.61.

**Crystal data for 7g:** Empirical formula,  $\text{C}_{22}\text{H}_{24}\text{O}_5$ ; Formula weight, 368.41; crystal color, colorless; habit, block; crystal dimensions, 0.20 x 0.18 x 0.10  $\text{mm}^3$ ; crystal system, monoclinic; lattice type, primitive; lattice parameters,  $a = 15.8167(12)$  Å,  $b = 8.2210(6)$  Å,  $c = 15.9694(12)$  Å,  $\alpha = 90.00$ ,  $\beta = 116.3120(10)$ ,  $\gamma = 90.00$ ;  $V = 1861.3(2)$  Å<sup>3</sup>; space group,  $p2(1)/n$ ;  $Z = 4$ ;  $D_{\text{cald}} = 1.315$  g /  $\text{cm}^3$ ;  $F_{000} = 784$ ;  $\lambda$  (Mo-K $\alpha$ ) = 0.71073 Å;  $R(I \geq 2\sigma_1) = 0.0519$ ,  $wR^2 = 0.1368$ . Detailed X-ray crystallographic data is available from the Cambridge Crystallographic Data Centre, 12 Union Road, Cambridge CB2 1EZ, UK (for compound **7g** CCDC # 915413).

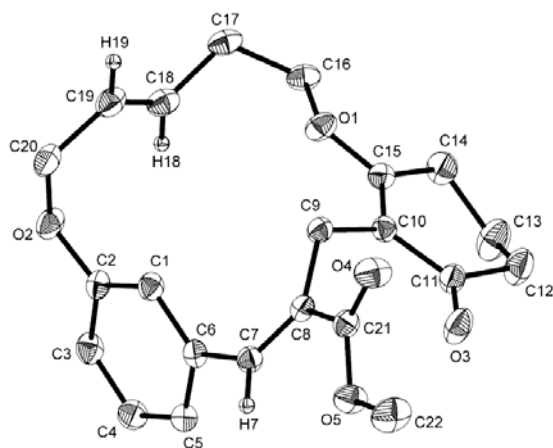

ORTEP diagram of compound **7g**

**(4*E*,17*E*)-2,9-Dioxa-17-methoxycarbonyltricyclo[17.3.1.0<sup>10,15</sup>]tricosane-1(23),4,10(15),17,19-21-hexaen-14-one (**7h**):**

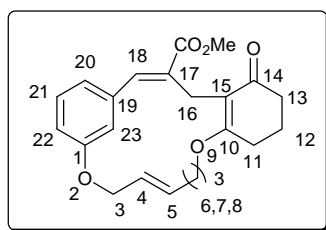

Yield: 81%; reaction time: (1h + 2h); colorless solid; mp: 80-82 °C; IR (KBr):  $\nu$  1712, 1655, 1604  $\text{cm}^{-1}$ ;  $^1\text{H}$  NMR (400 MHz,  $\text{CDCl}_3$ ):  $\delta$  1.64-1.72 (m, 2H), 1.78-1.88 (m, 2H), 2.03-2.14 (m, 2H), 2.26 (t,  $J = 6.8$  Hz, 2H), 2.35 (t,  $J = 6.0$  Hz, 2H), 3.52 (s, 2H), 3.74 (s, 3H), 3.79 (t,  $J = 6.4$  Hz, 2H), 4.64 (d,  $J = 4.8$  Hz, 2H), 5.46-5.58 (m, 1H), 5.66-5.80 (m, 1H), 6.78-6.92 (m, 3H), 7.17-7.24 (m, 1H), 7.54 (s, 1H);  $^{13}\text{C}$  NMR (100 MHz,  $\text{CDCl}_3$ ):  $\delta$  20.78, 21.33, 25.75, 28.59, 29.21, 36.44, 51.82, 66.80, 68.79, 114.94, 117.39, 117.79, 122.09, 126.76, 129.12, 132.54, 134.85, 137.50, 137.61, 157.63, 169.21, 171.71, 197.10; LCMS ( $m/z$ ): 383 ( $\text{M}+\text{H}$ )<sup>+</sup>; Analysis calcd. for  $\text{C}_{23}\text{H}_{26}\text{O}_5$ : C, 72.23; H, 6.85; Found: C, 72.35; H, 6.79.

**(4*E*,16*E*)-2,9-Dioxa-16-methoxycarbonyltricyclo[16.3.1.0<sup>10,14</sup>]docosane-1(22),4,10(14),16,18-20-hexaen-13-one (7i):**

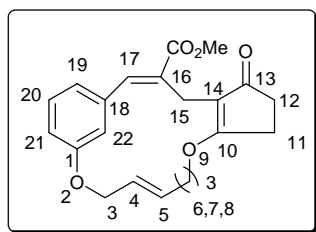

Yield: 85%; reaction time: (1h + 2h); colorless solid; mp: 80-82 °C; IR (KBr):  $\nu$  1711, 1678, 1616  $\text{cm}^{-1}$ ;  $^1\text{H}$  NMR (400 MHz,  $\text{CDCl}_3$ ):  $\delta$  1.82-1.92 (m, 2H), 2.26-2.38 (m, 2H), 2.39-2.50 (m, 2H), 2.58-2.68 (m, 2H), 3.49 (s, 2H), 3.86 (s, 3H), 4.15 (t,  $J = 4.8$  Hz, 2H), 4.55 (d,  $J = 6.4$  Hz, 2H), 5.64- 5.76 (m, 1H), 5.86-5.98 (m, 1H), 6.82-6.94 (m, 2H), 6.98 (s, 1H), 7.23 (d,  $J = 8.0$  Hz, 1H), 7.63 (s, 1H);  $^{13}\text{C}$  NMR (100 MHz,  $\text{CDCl}_3$ ):  $\delta$  21.61, 23.69, 25.06, 28.35, 33.31, 52.16, 63.98, 67.28, 114.26, 115.91, 117.59, 123.42, 126.25, 129.30, 130.63, 133.98, 137.07, 137.70, 158.36, 169.33, 183.44, 203.36; LCMS ( $m/z$ ): 369 ( $\text{M}+\text{H}$ )<sup>+</sup>; Analysis calcd. for  $\text{C}_{22}\text{H}_{24}\text{O}_5$  : C, 71.72; H, 6.57; Found: C, 71.63; H, 6.51.

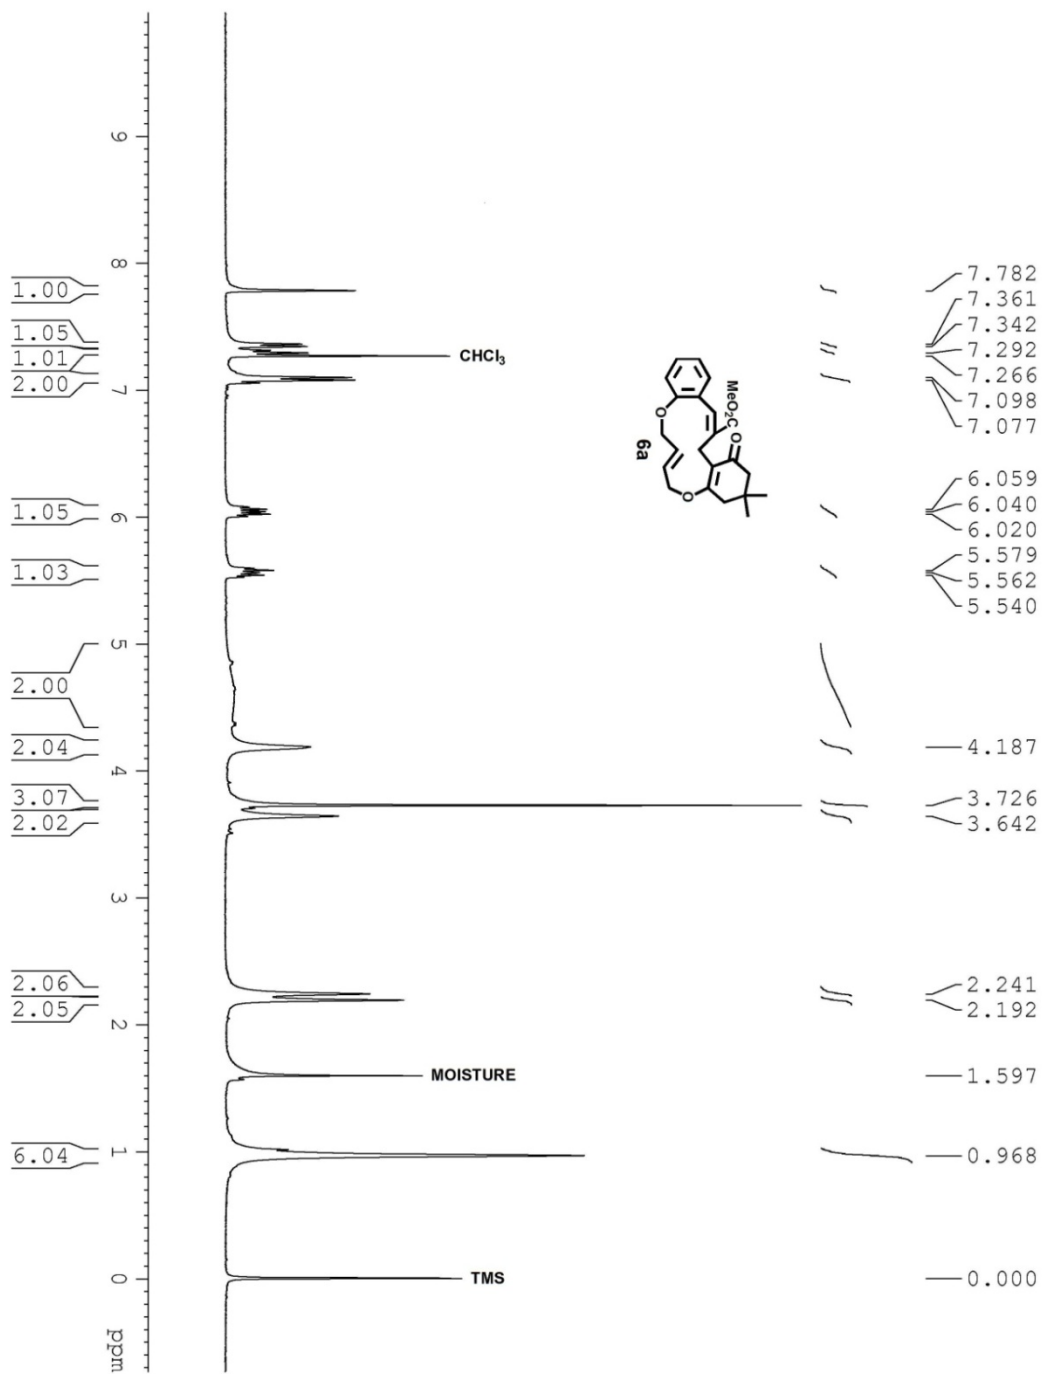

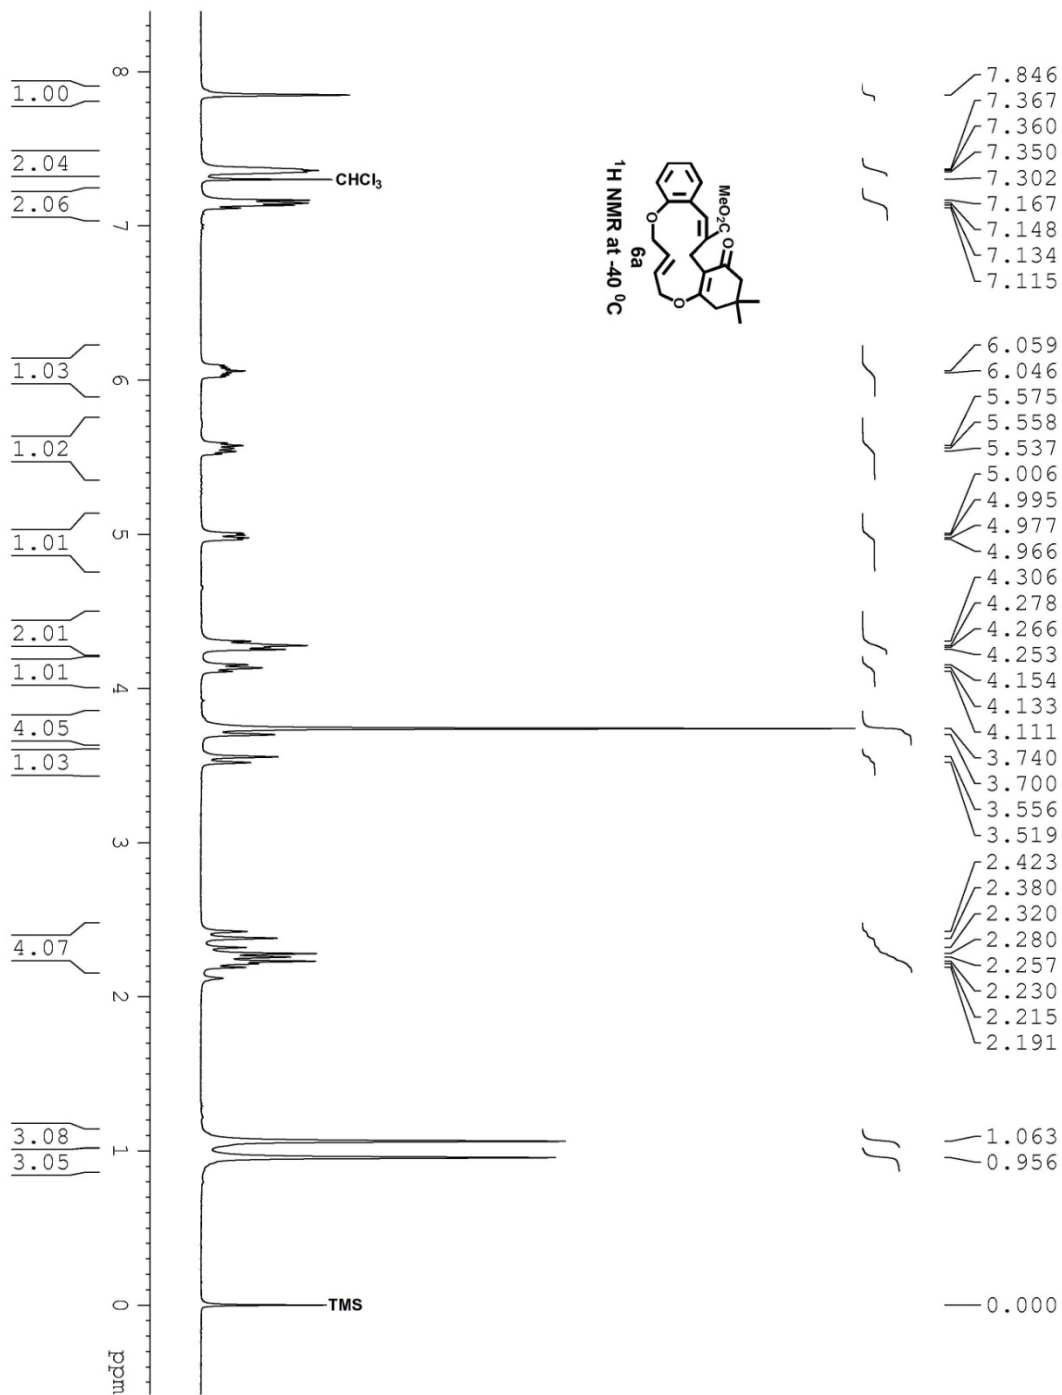

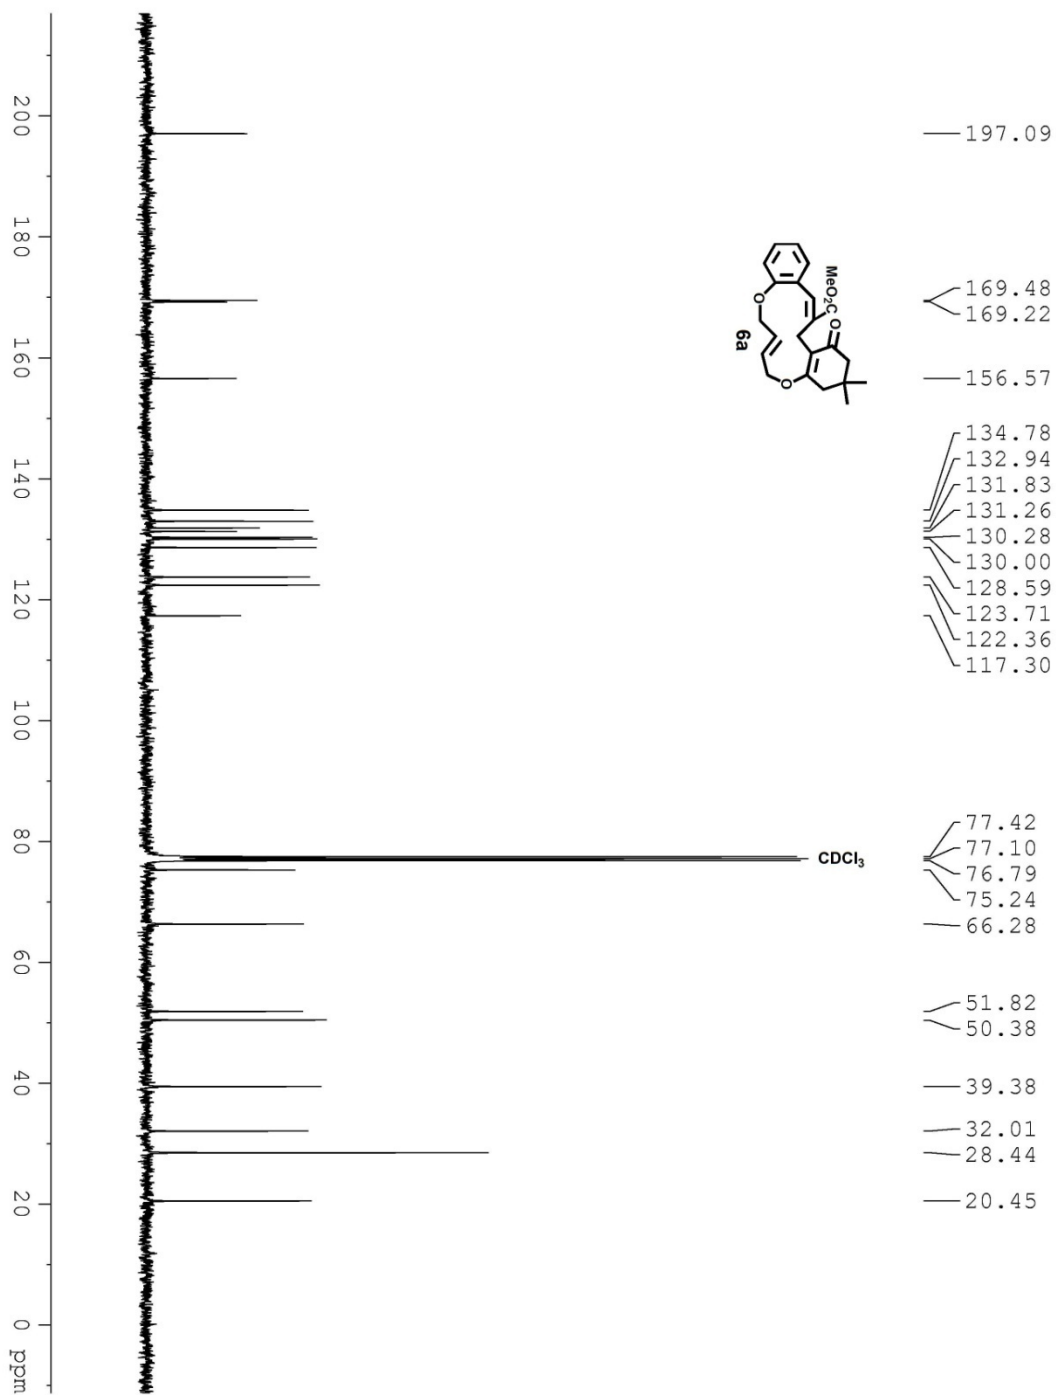



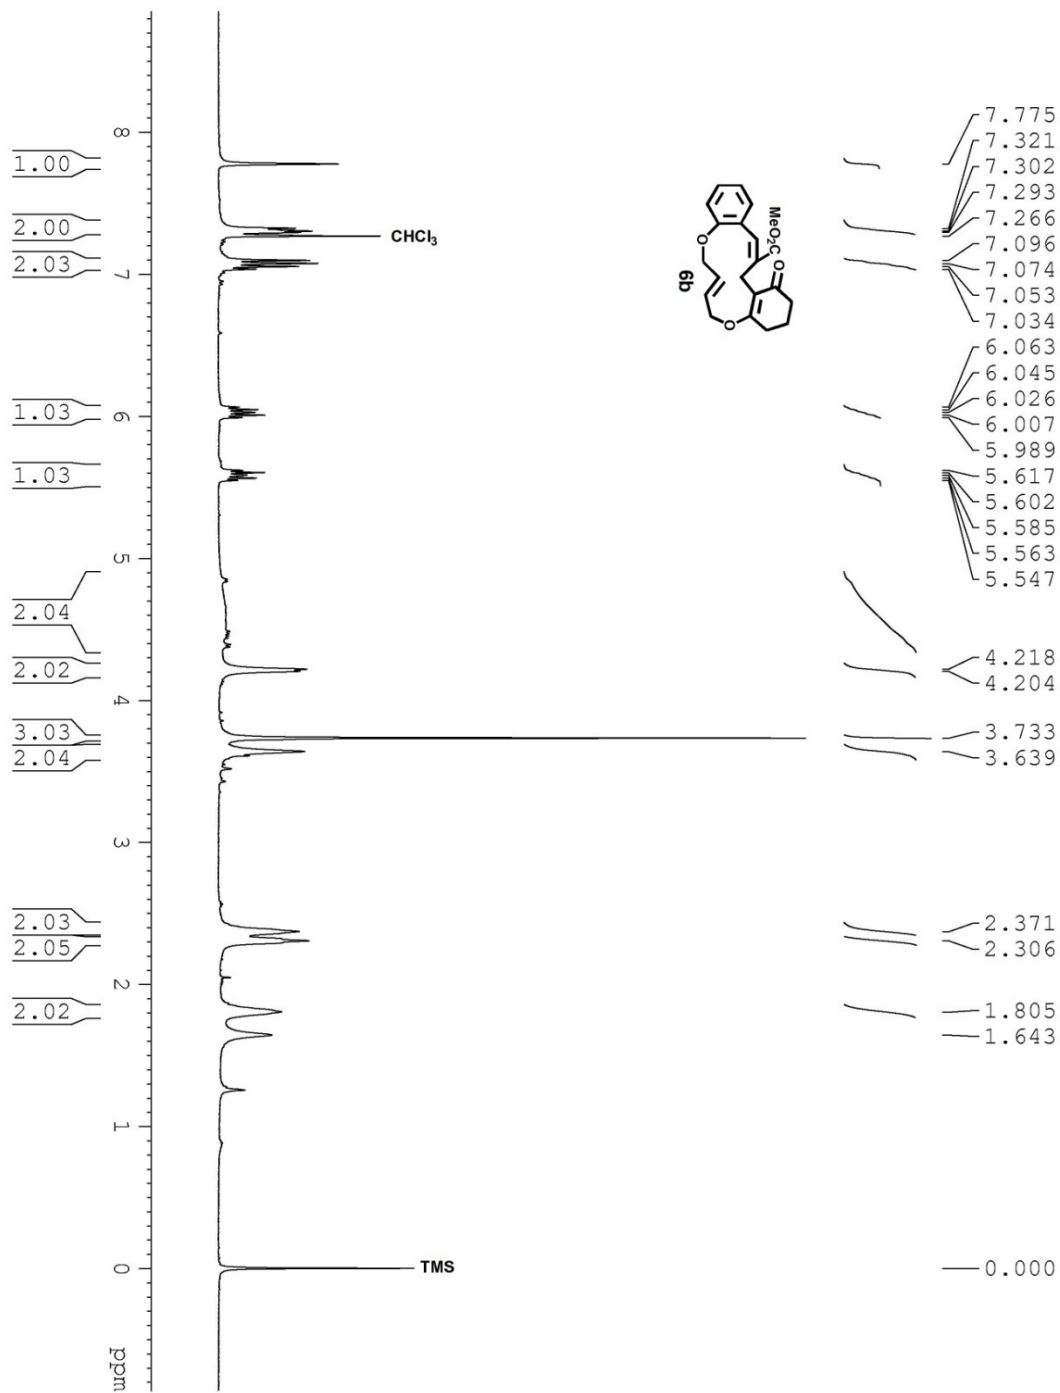

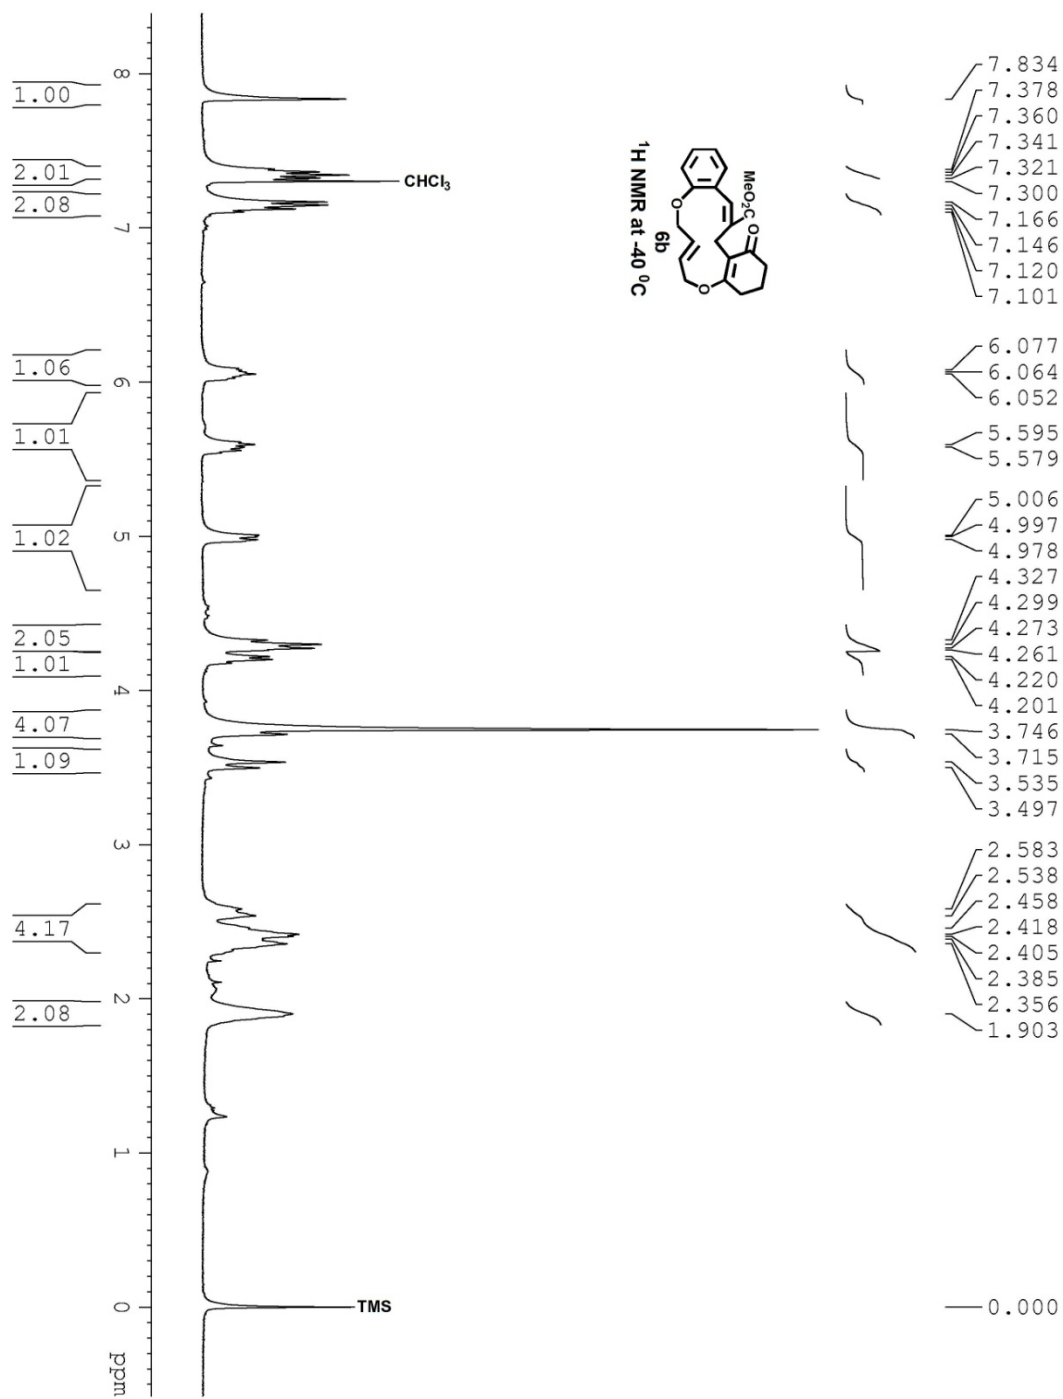

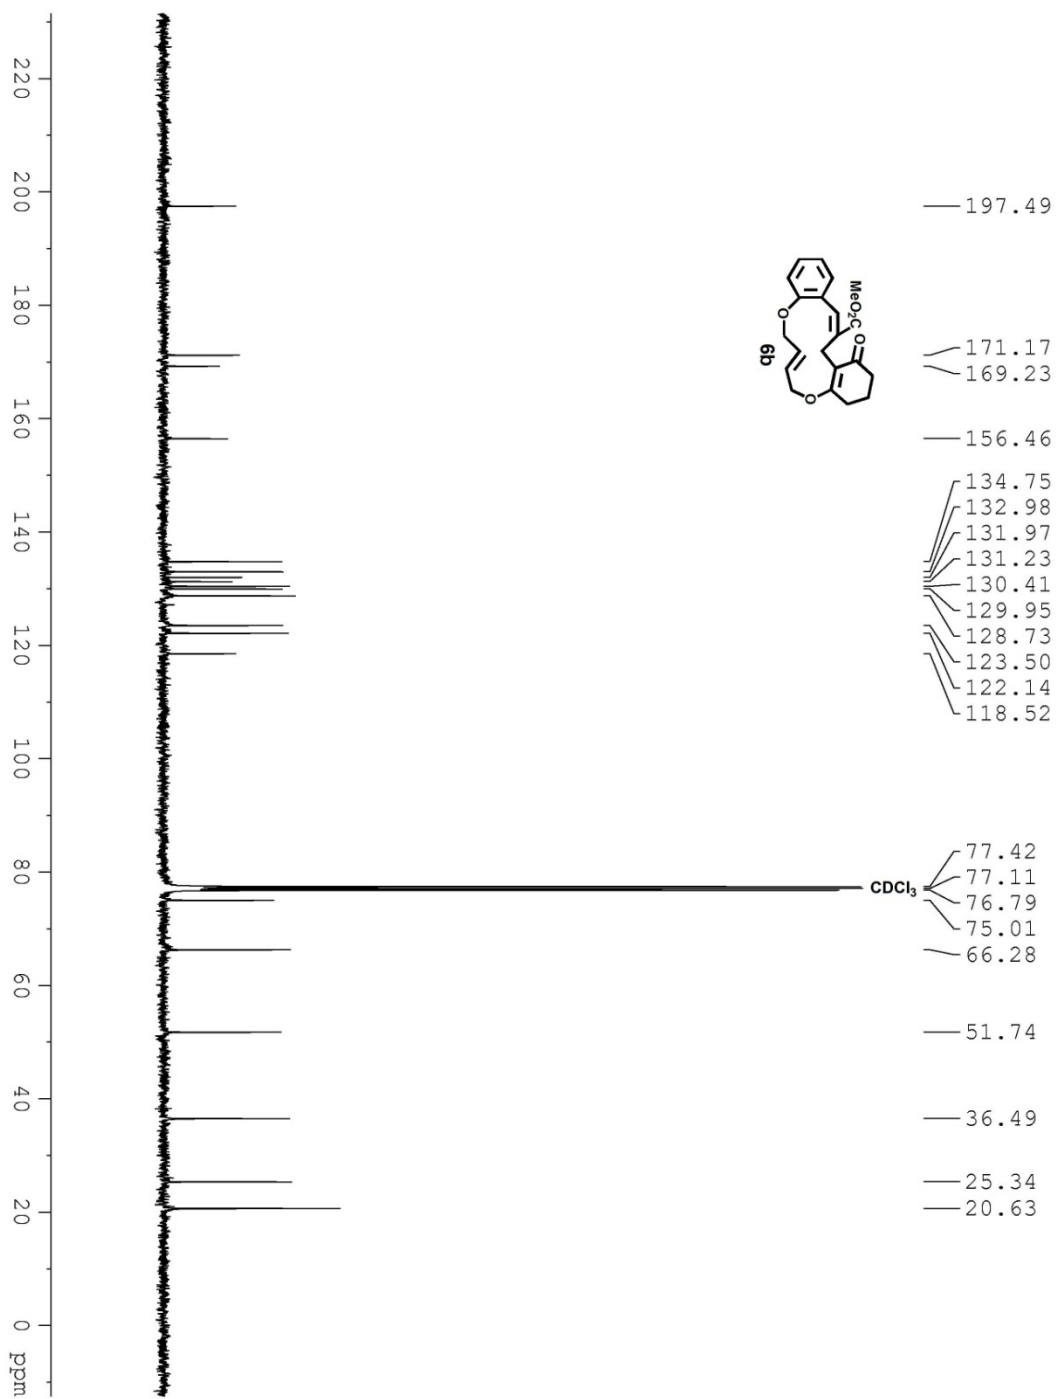

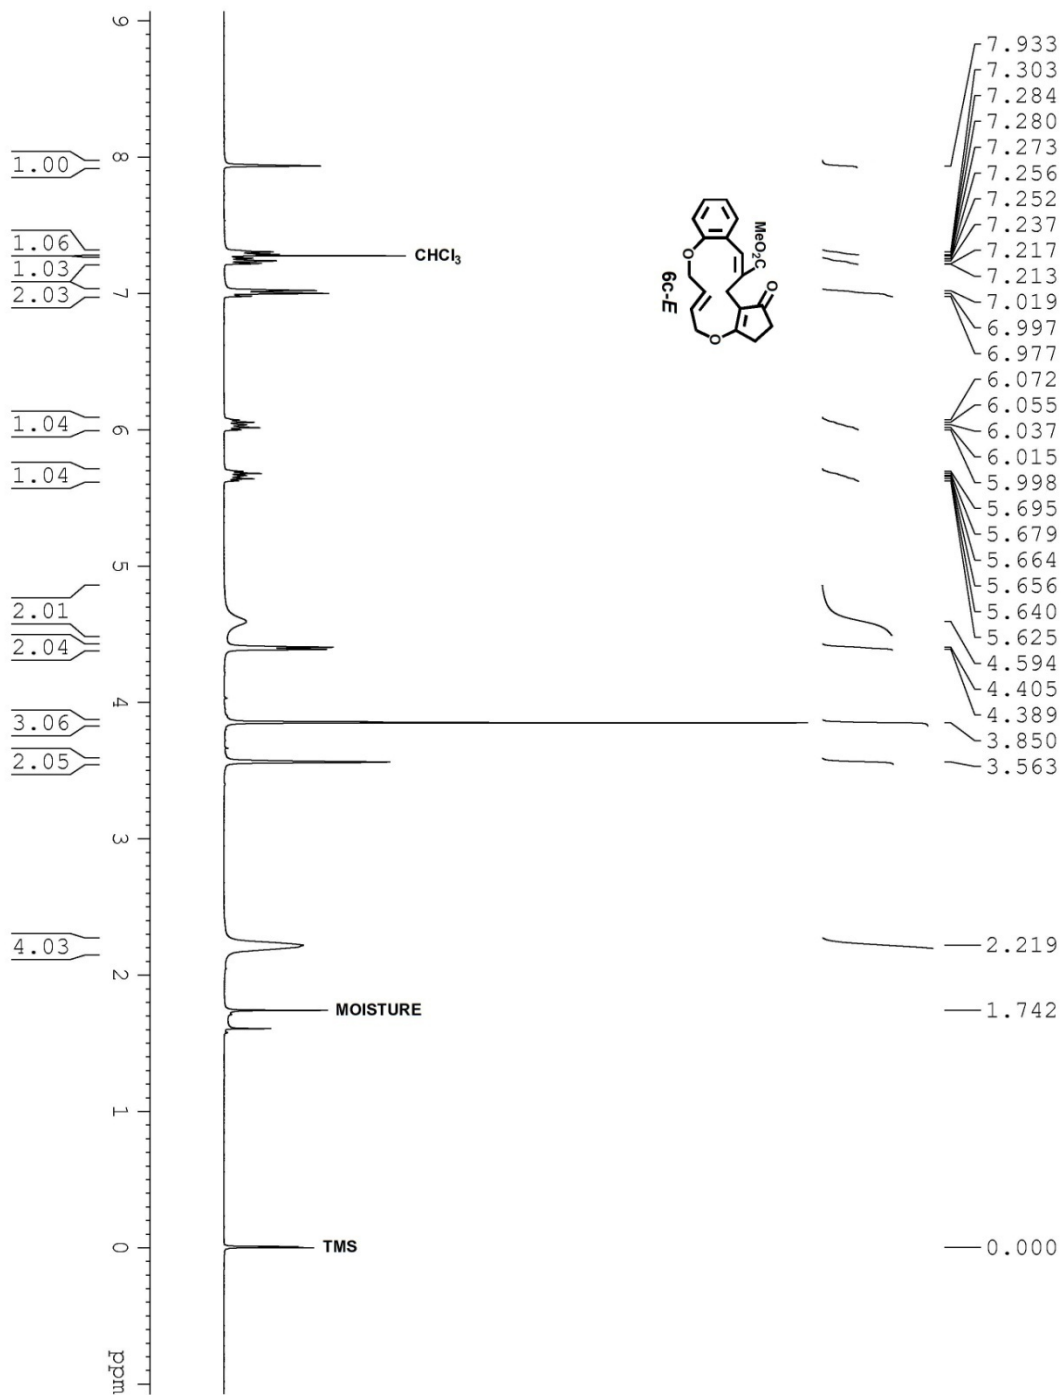

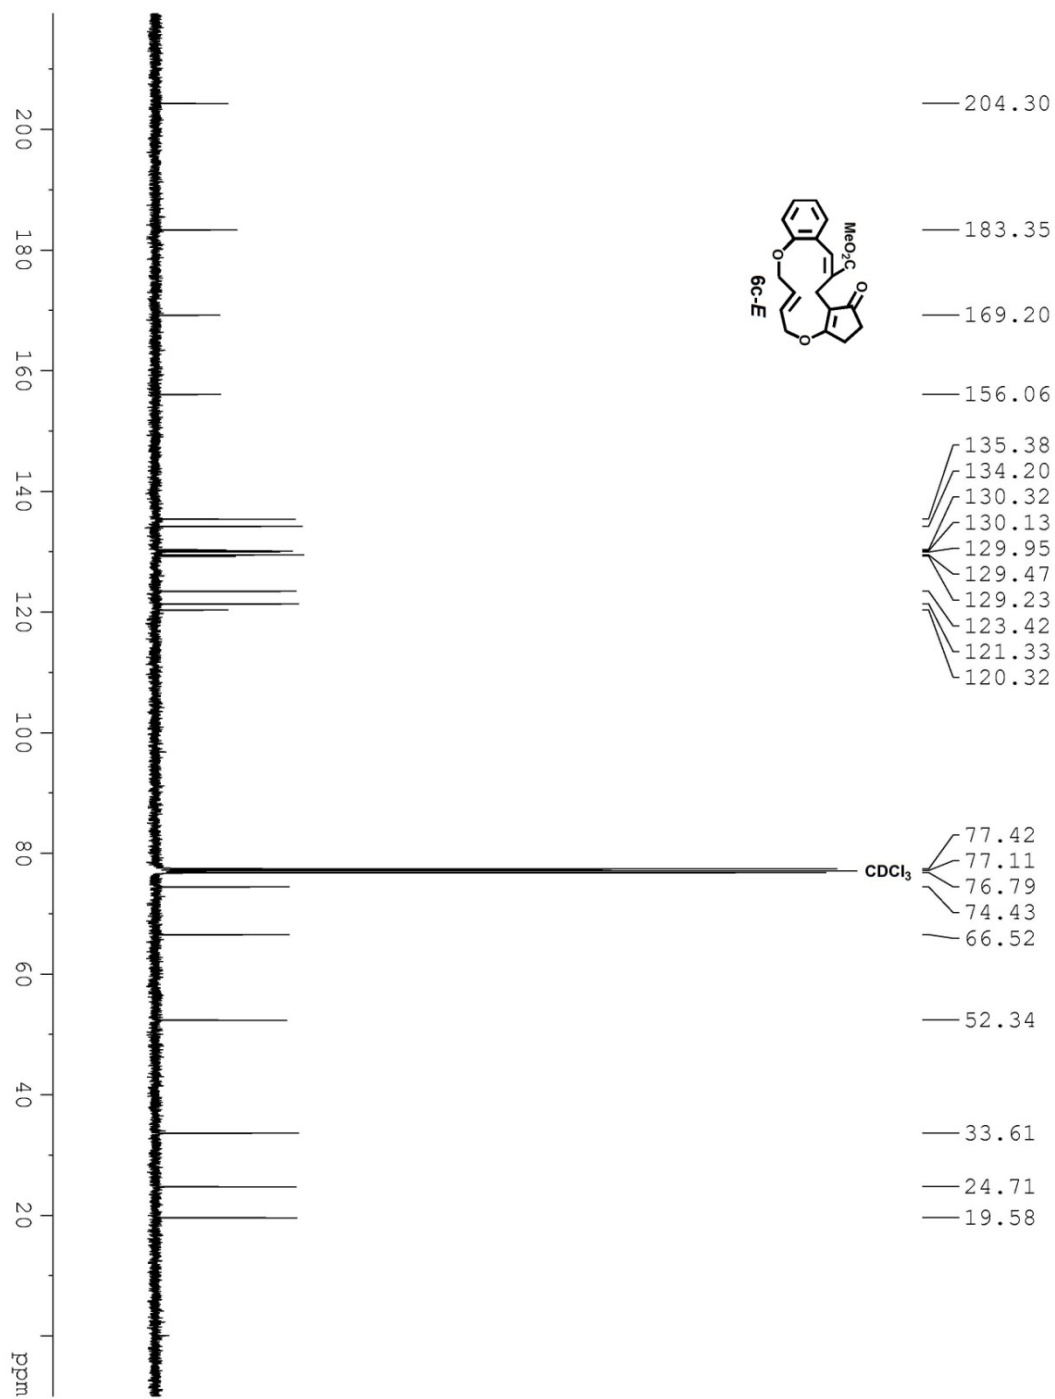

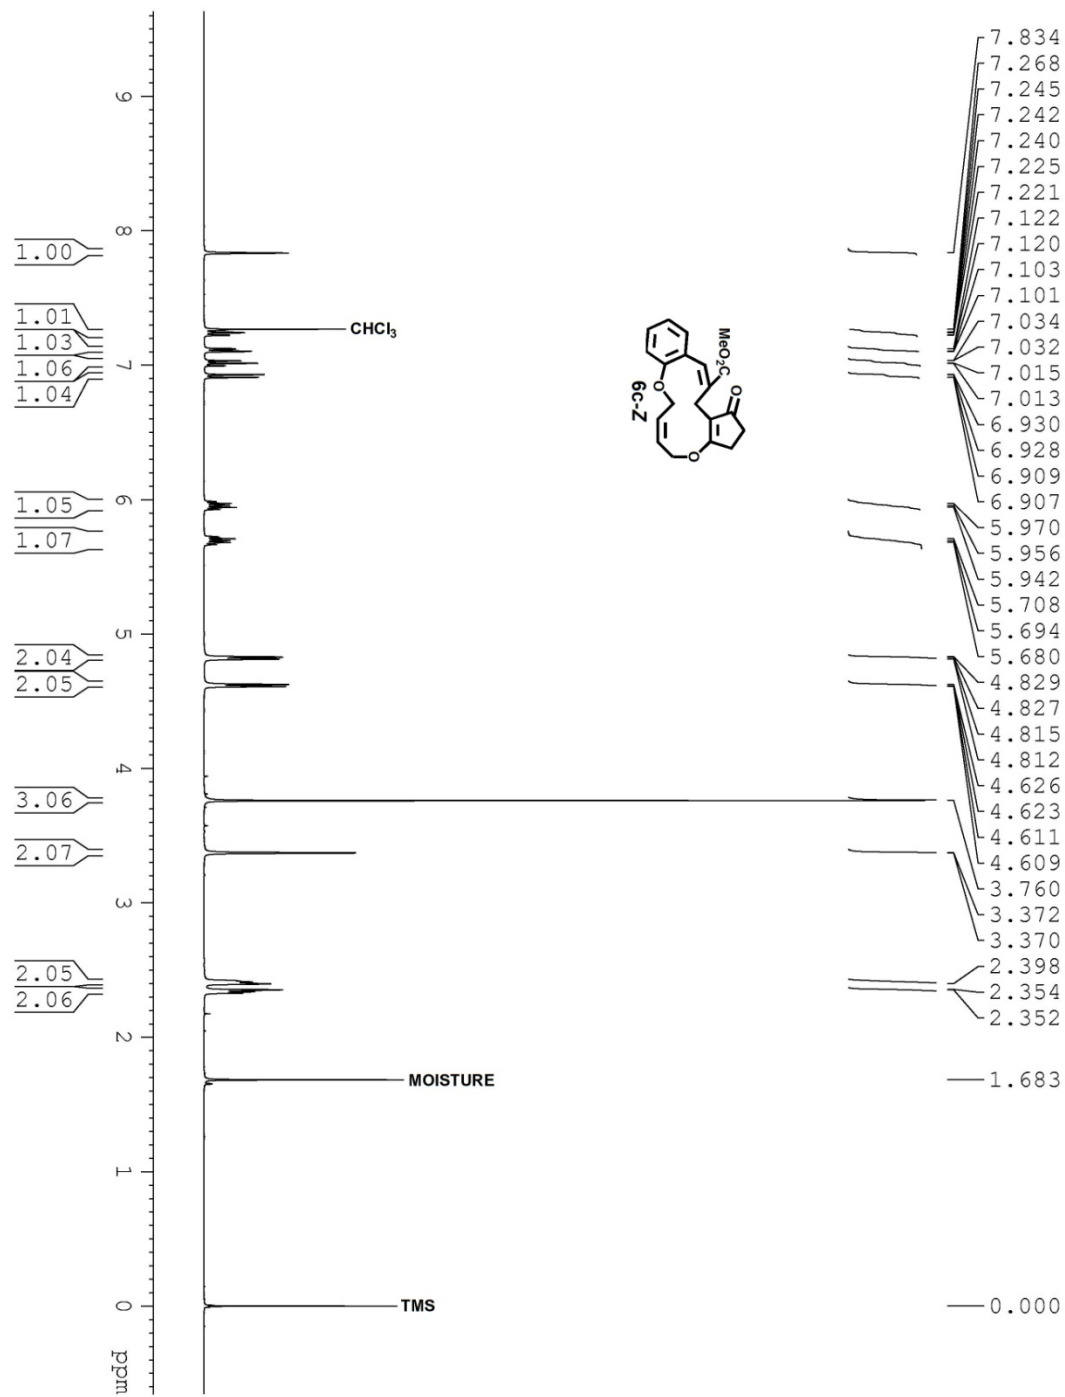

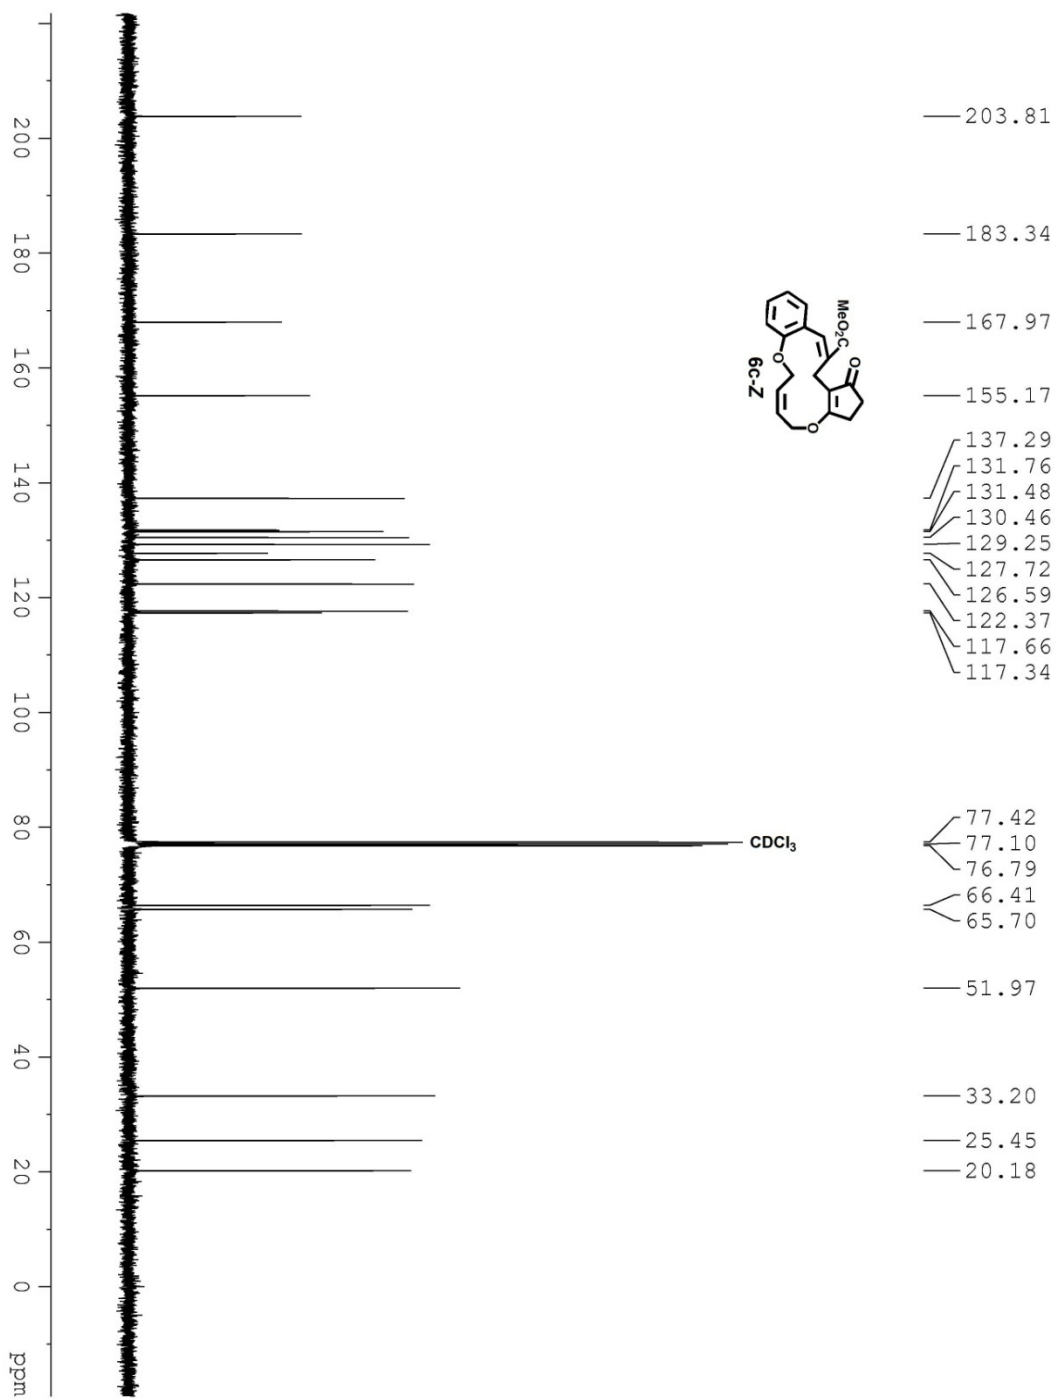

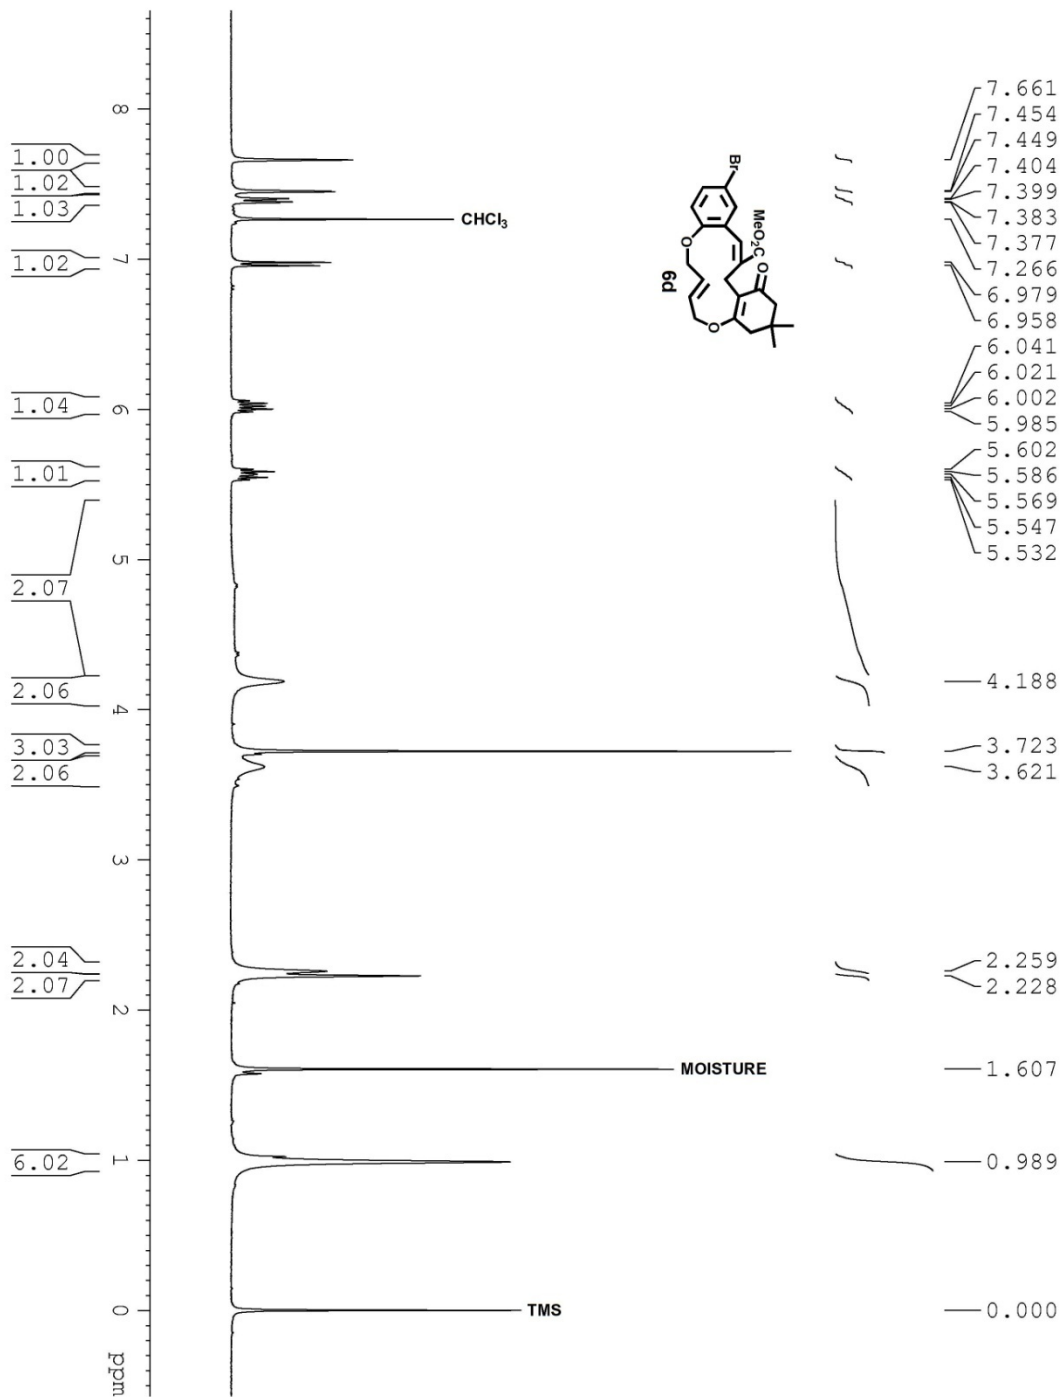



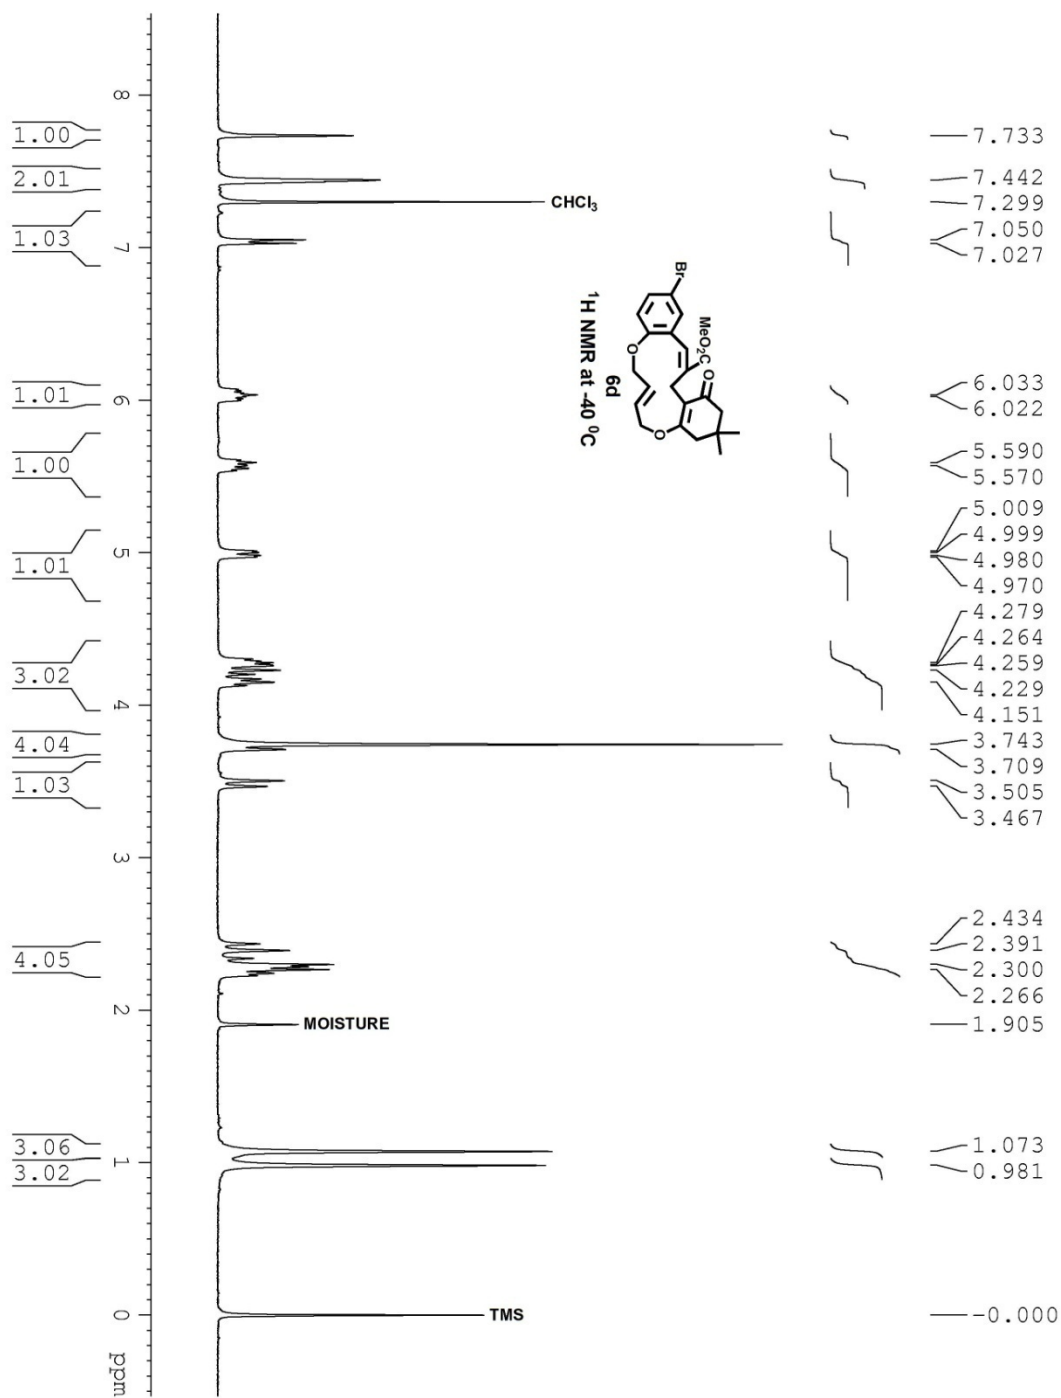

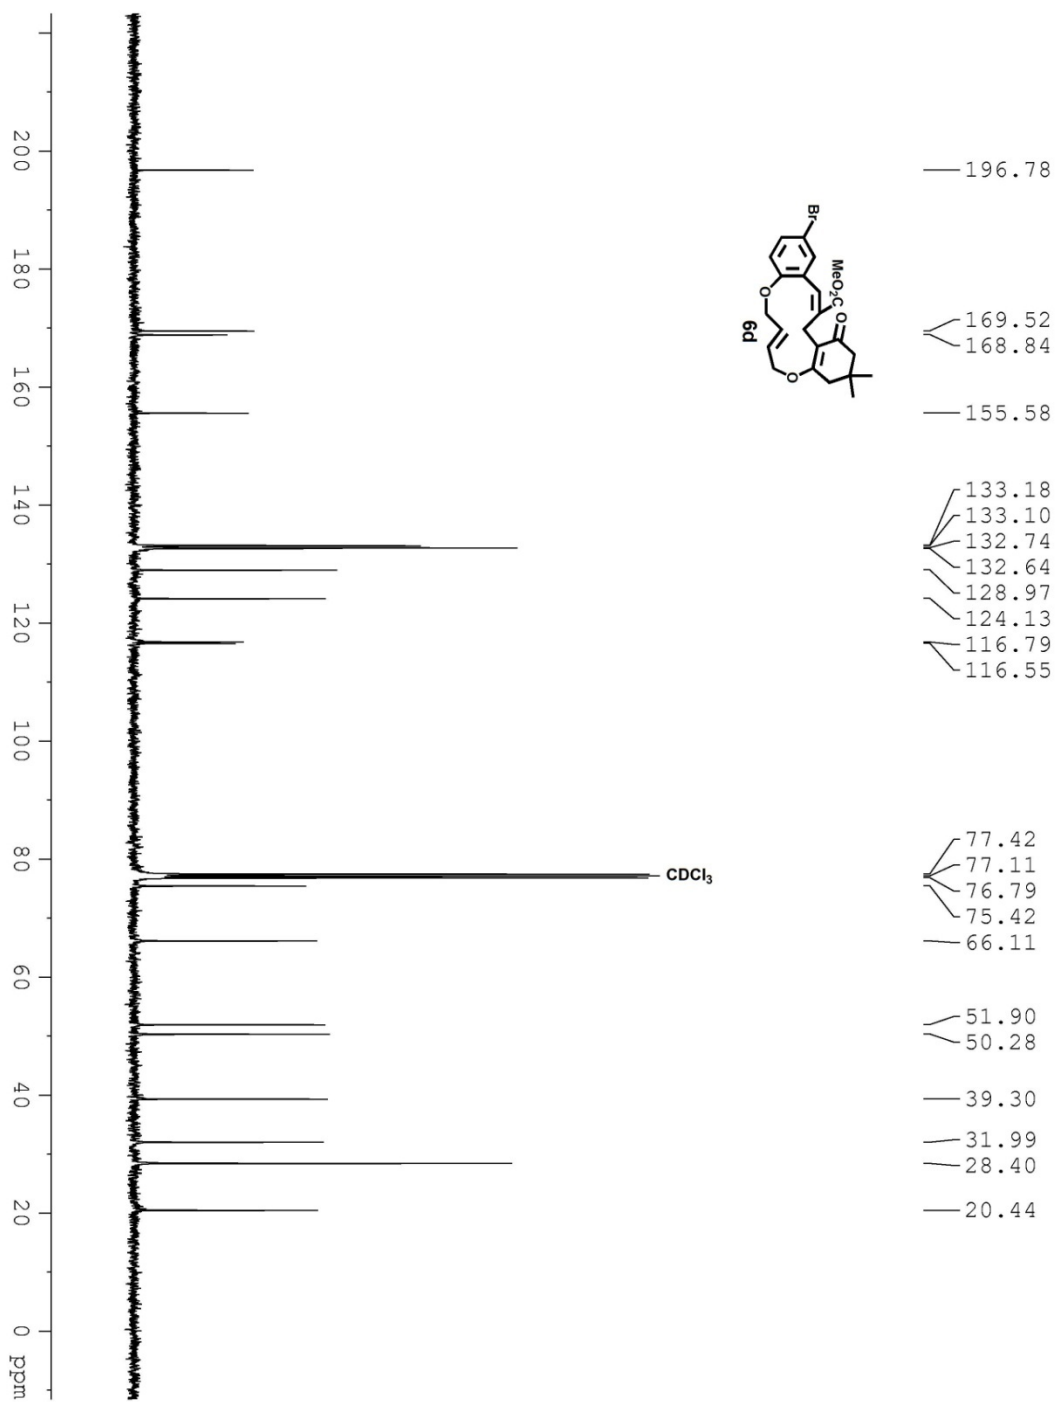

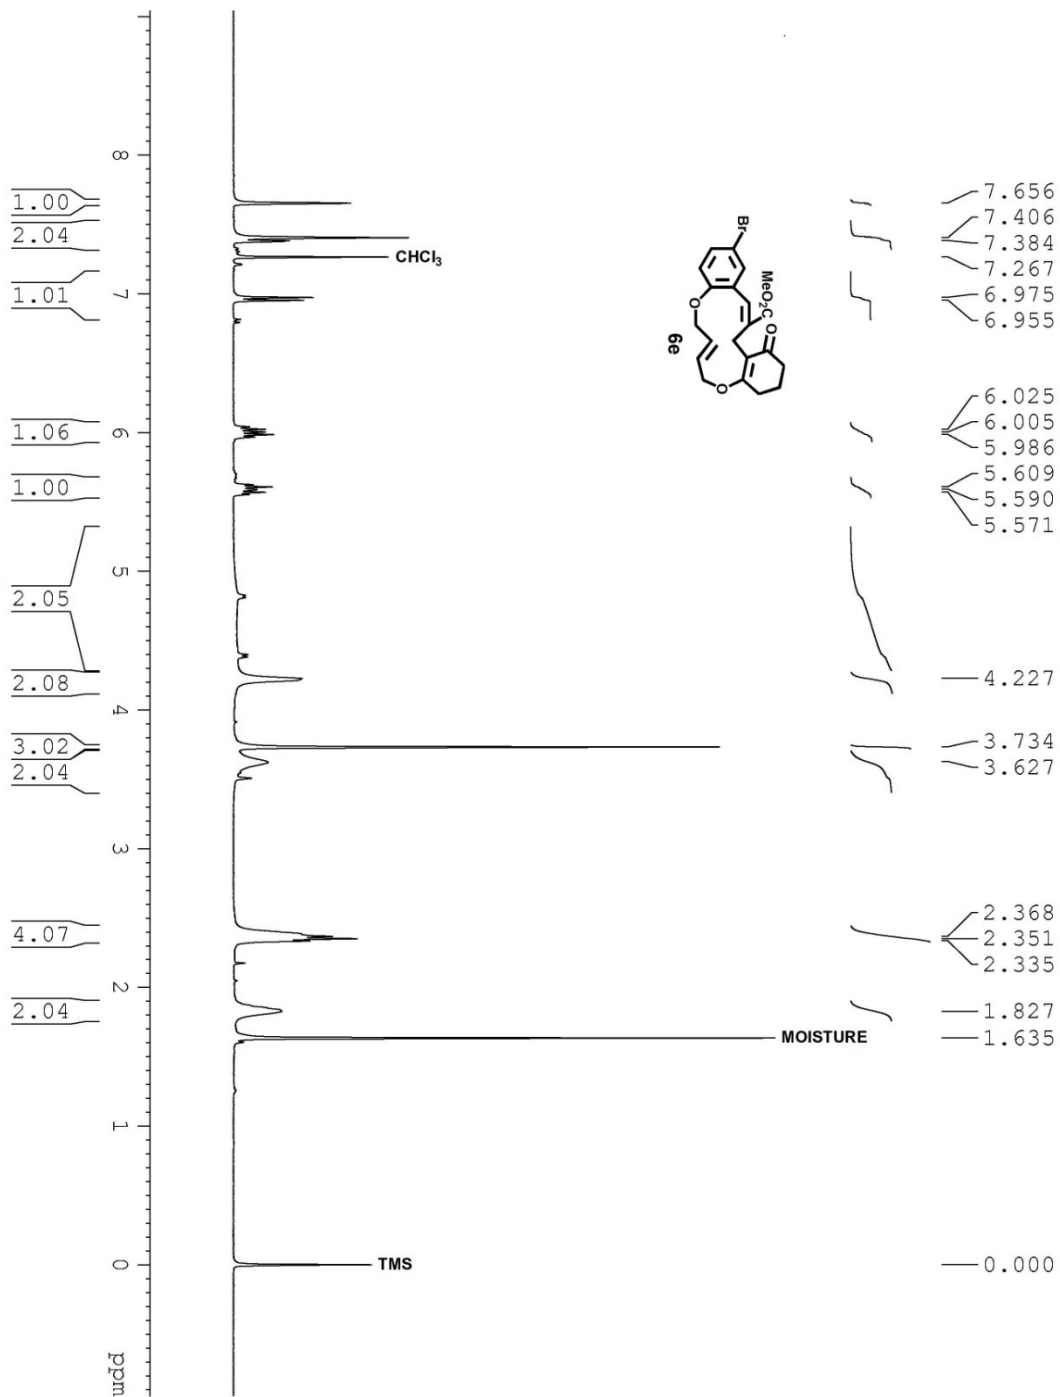

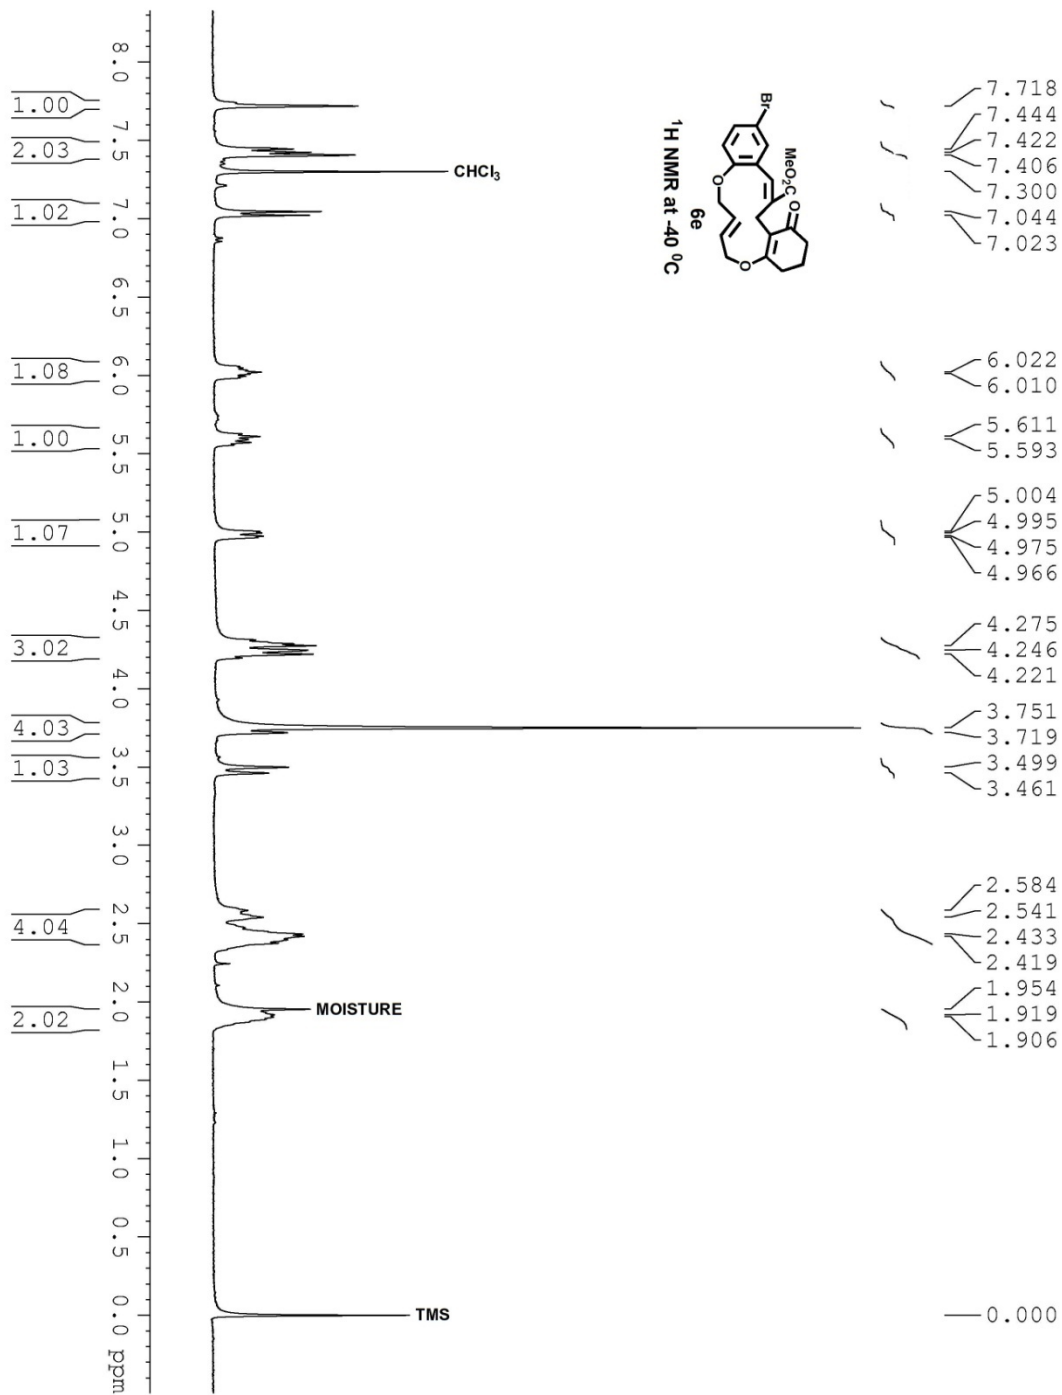



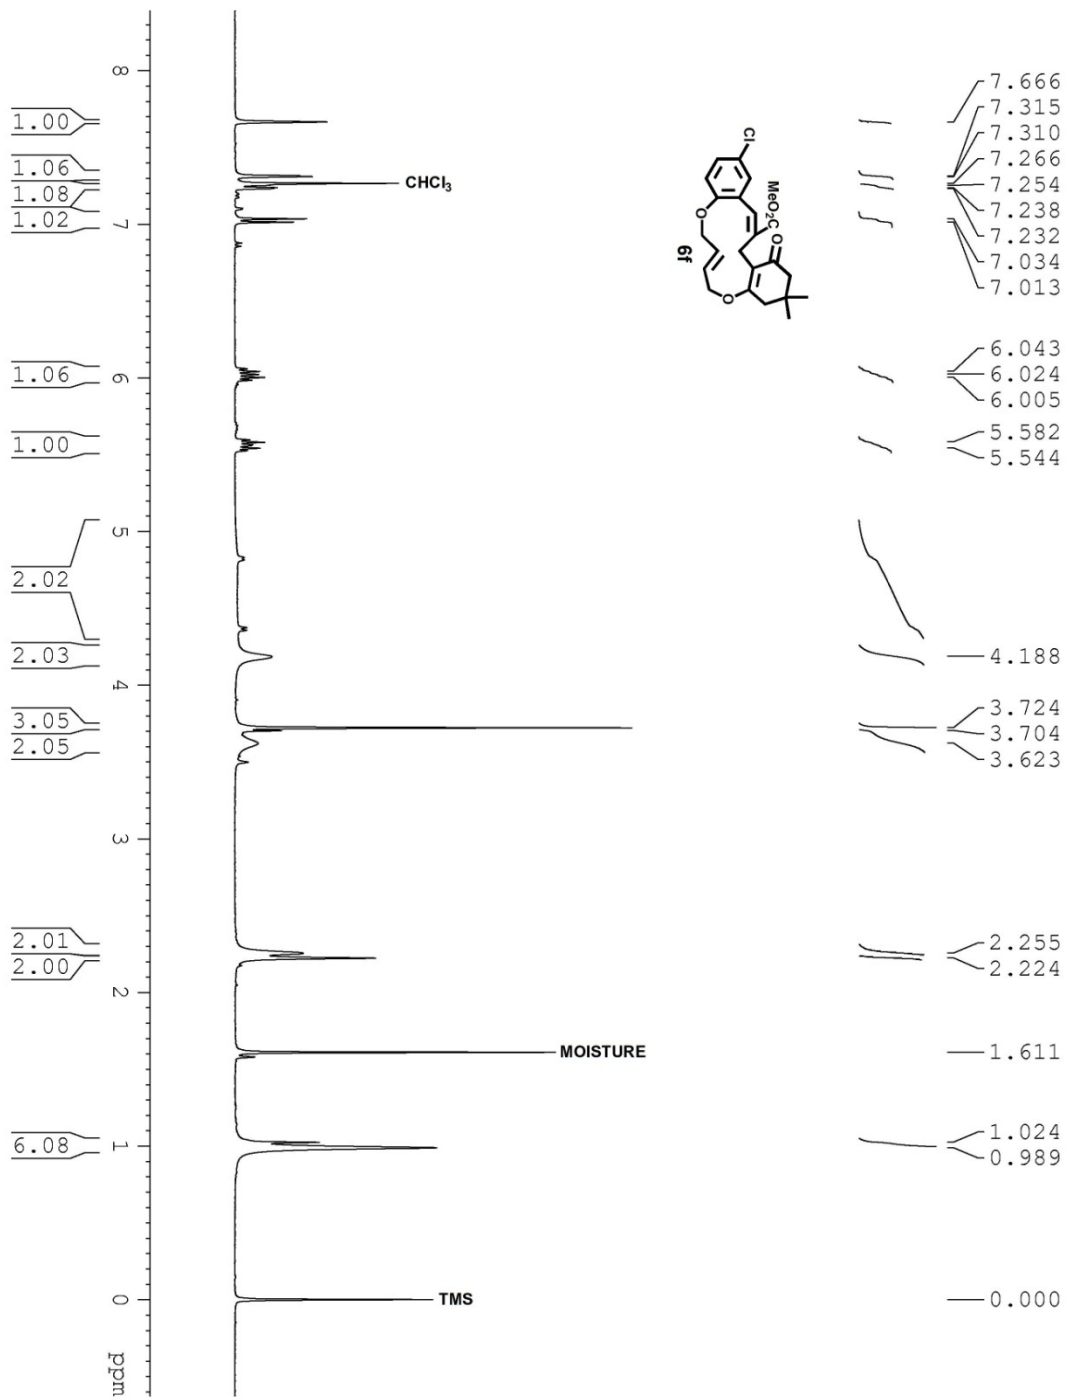

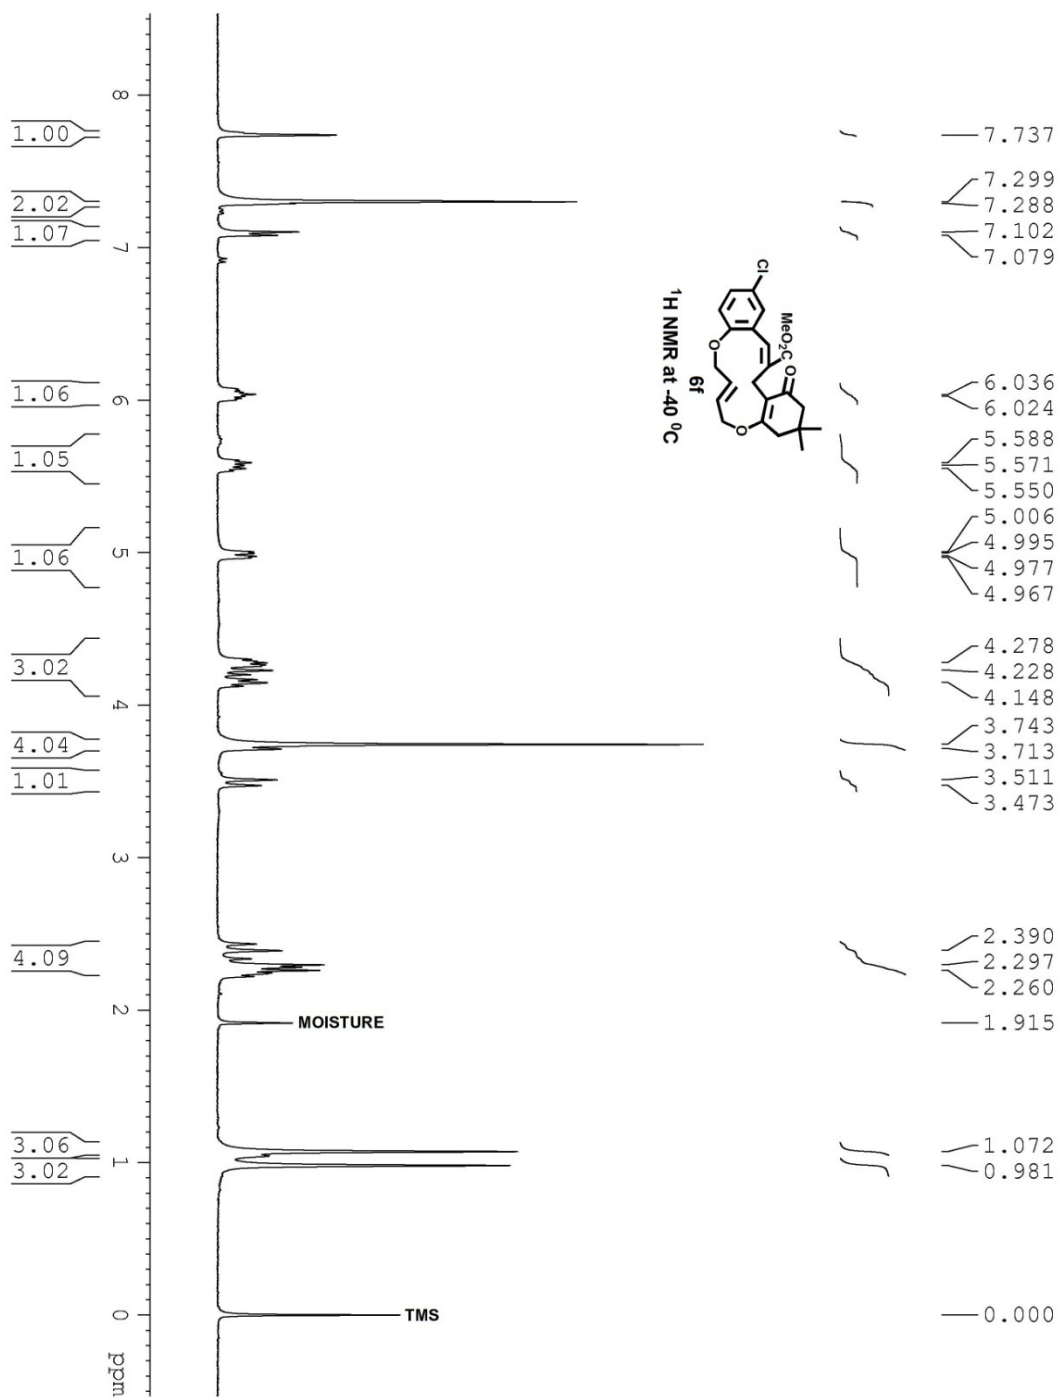

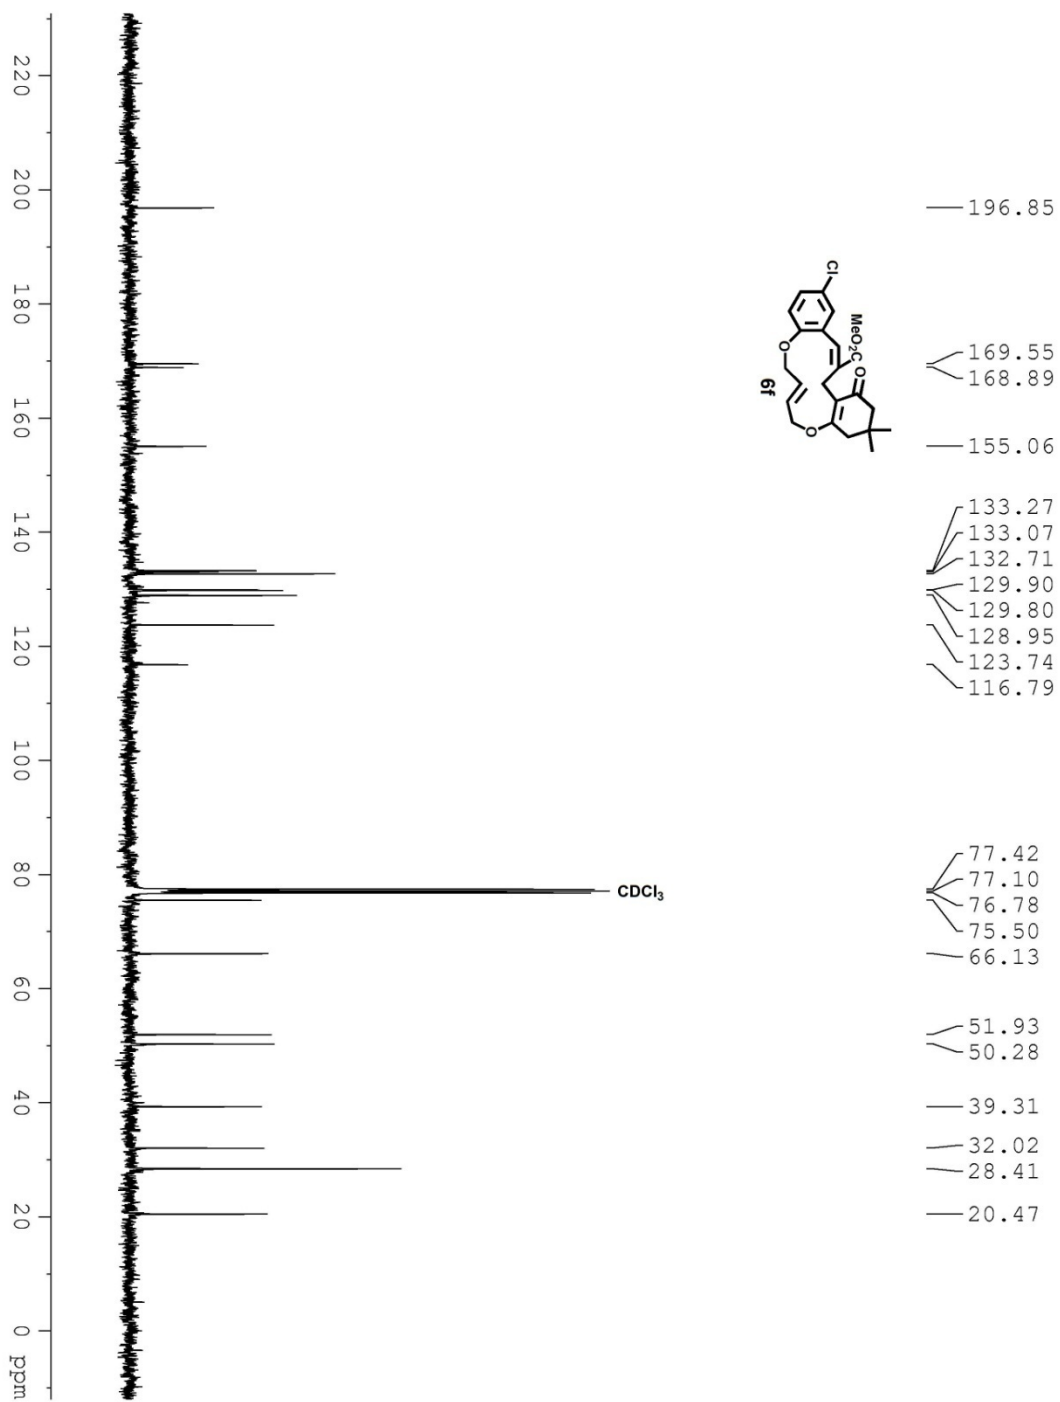



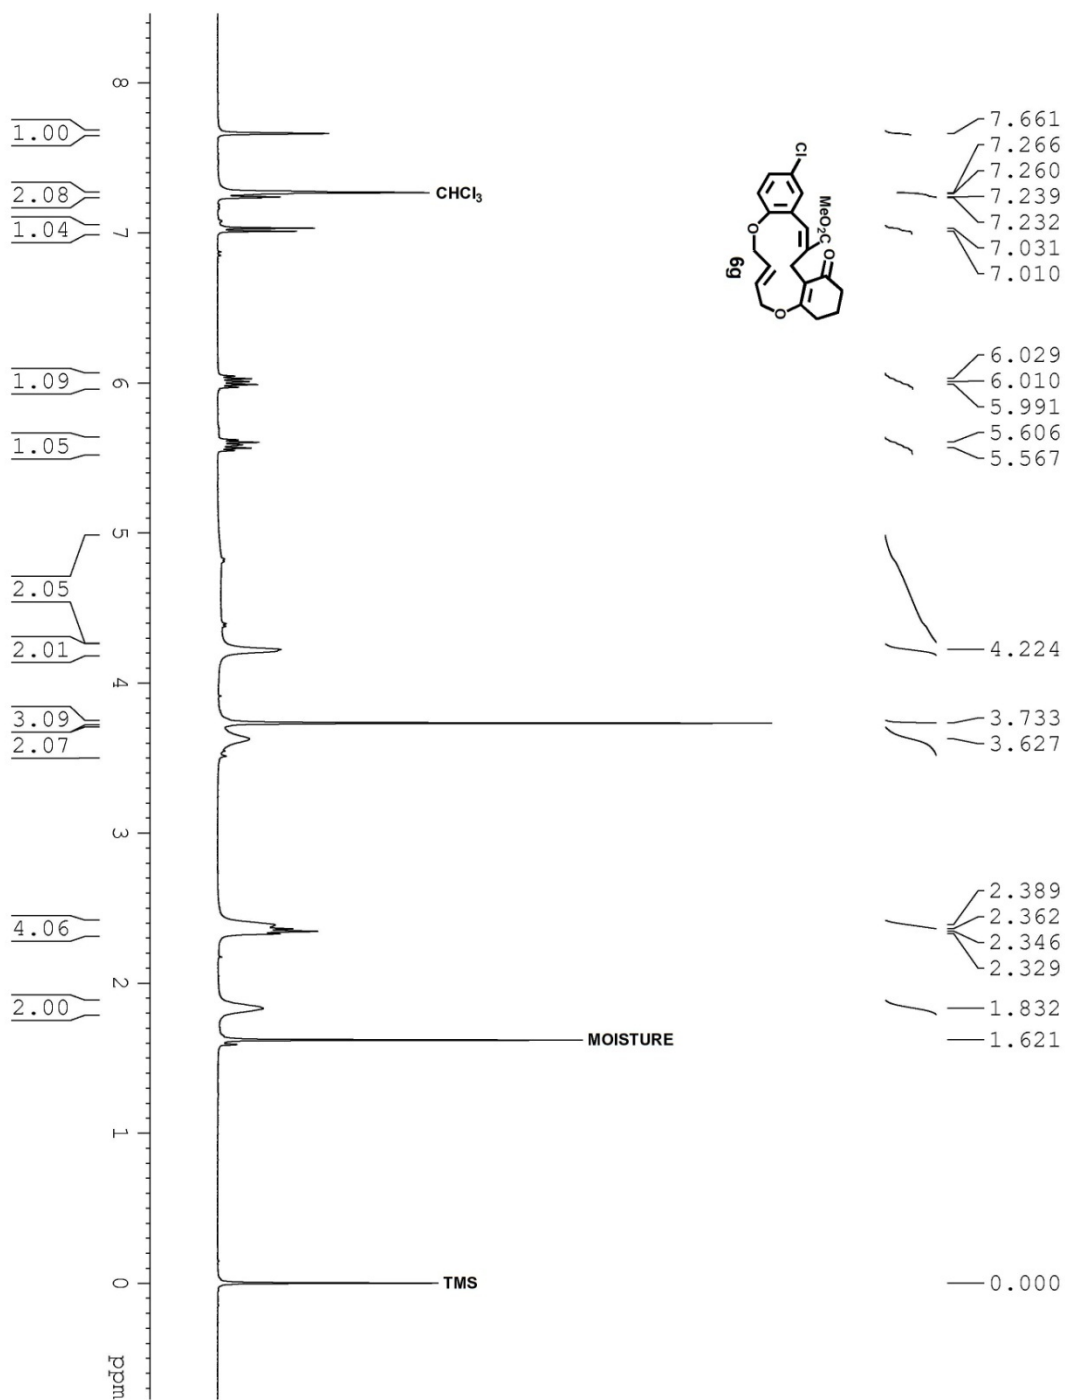

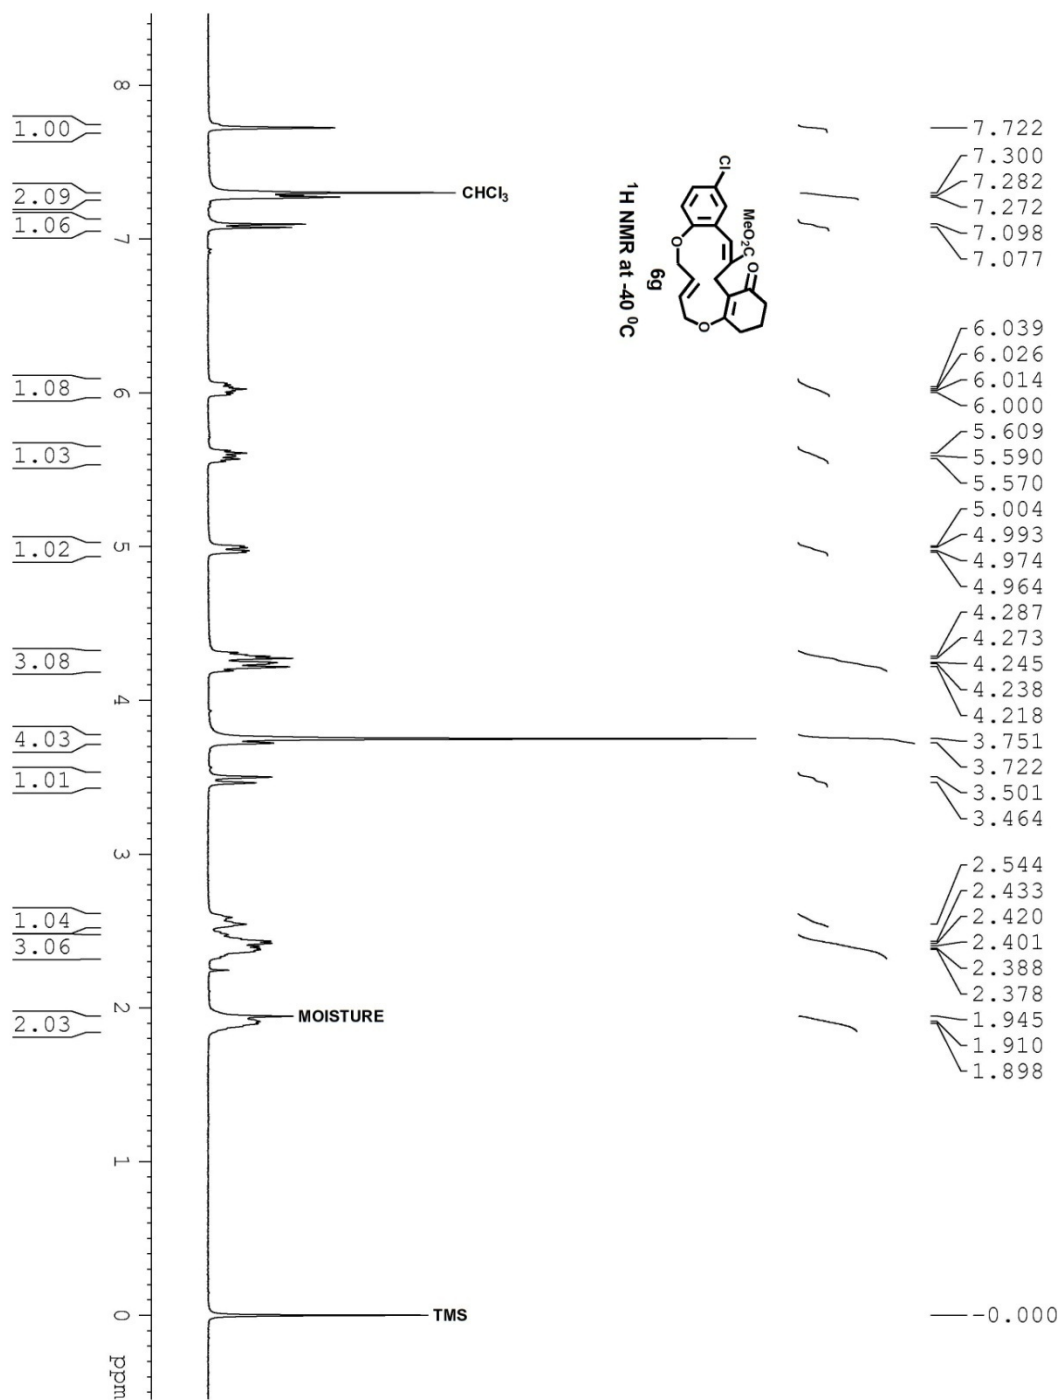

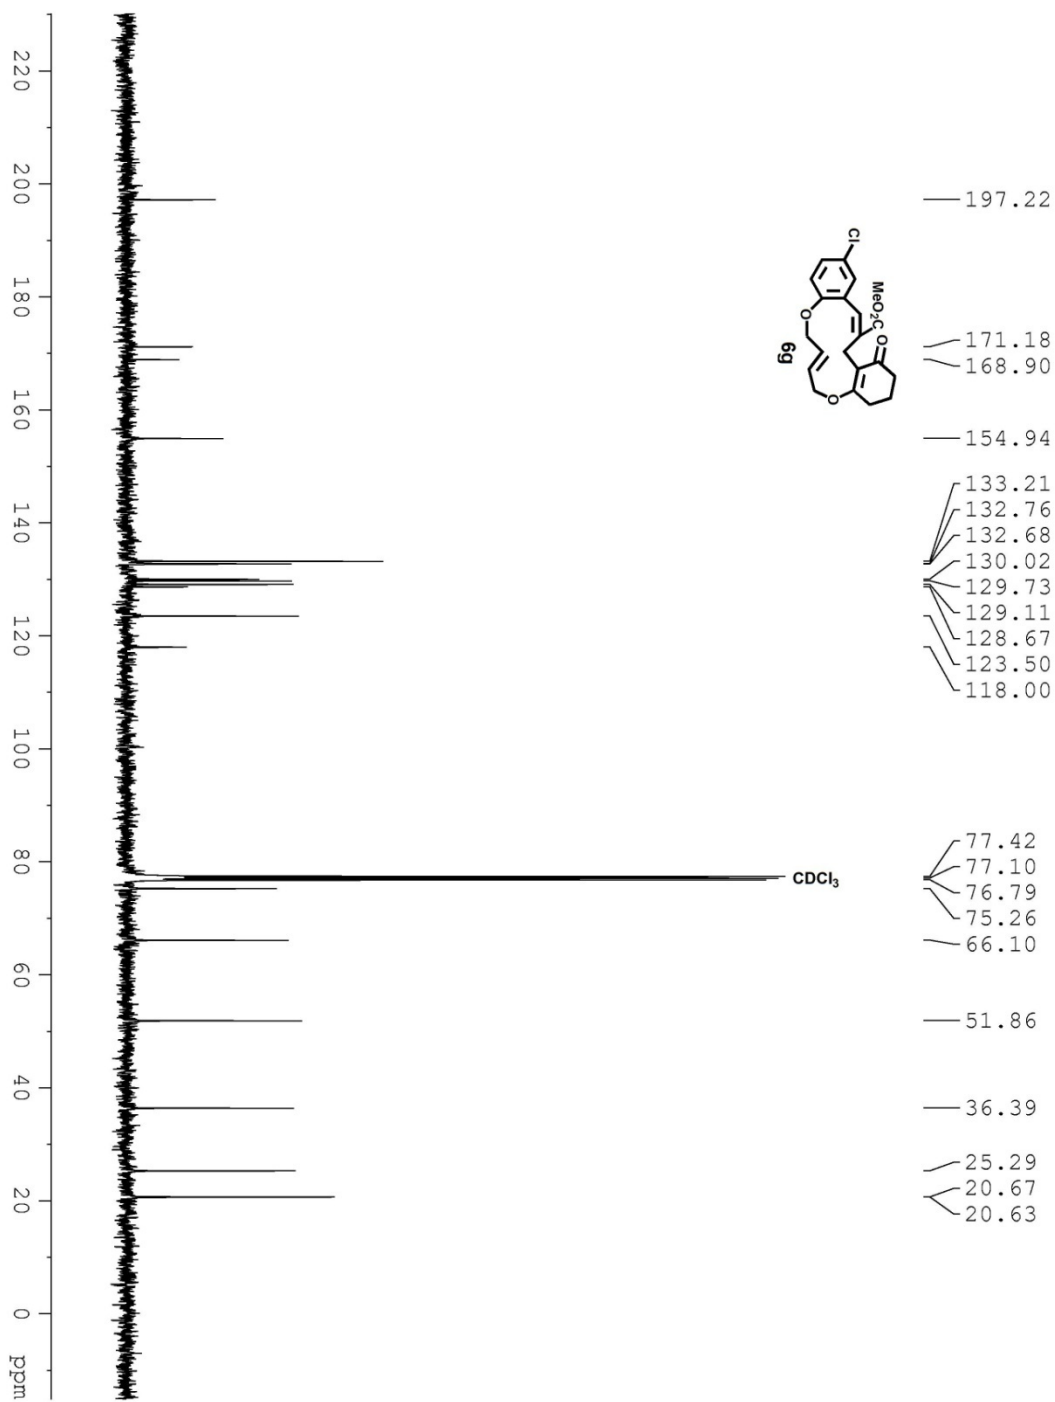

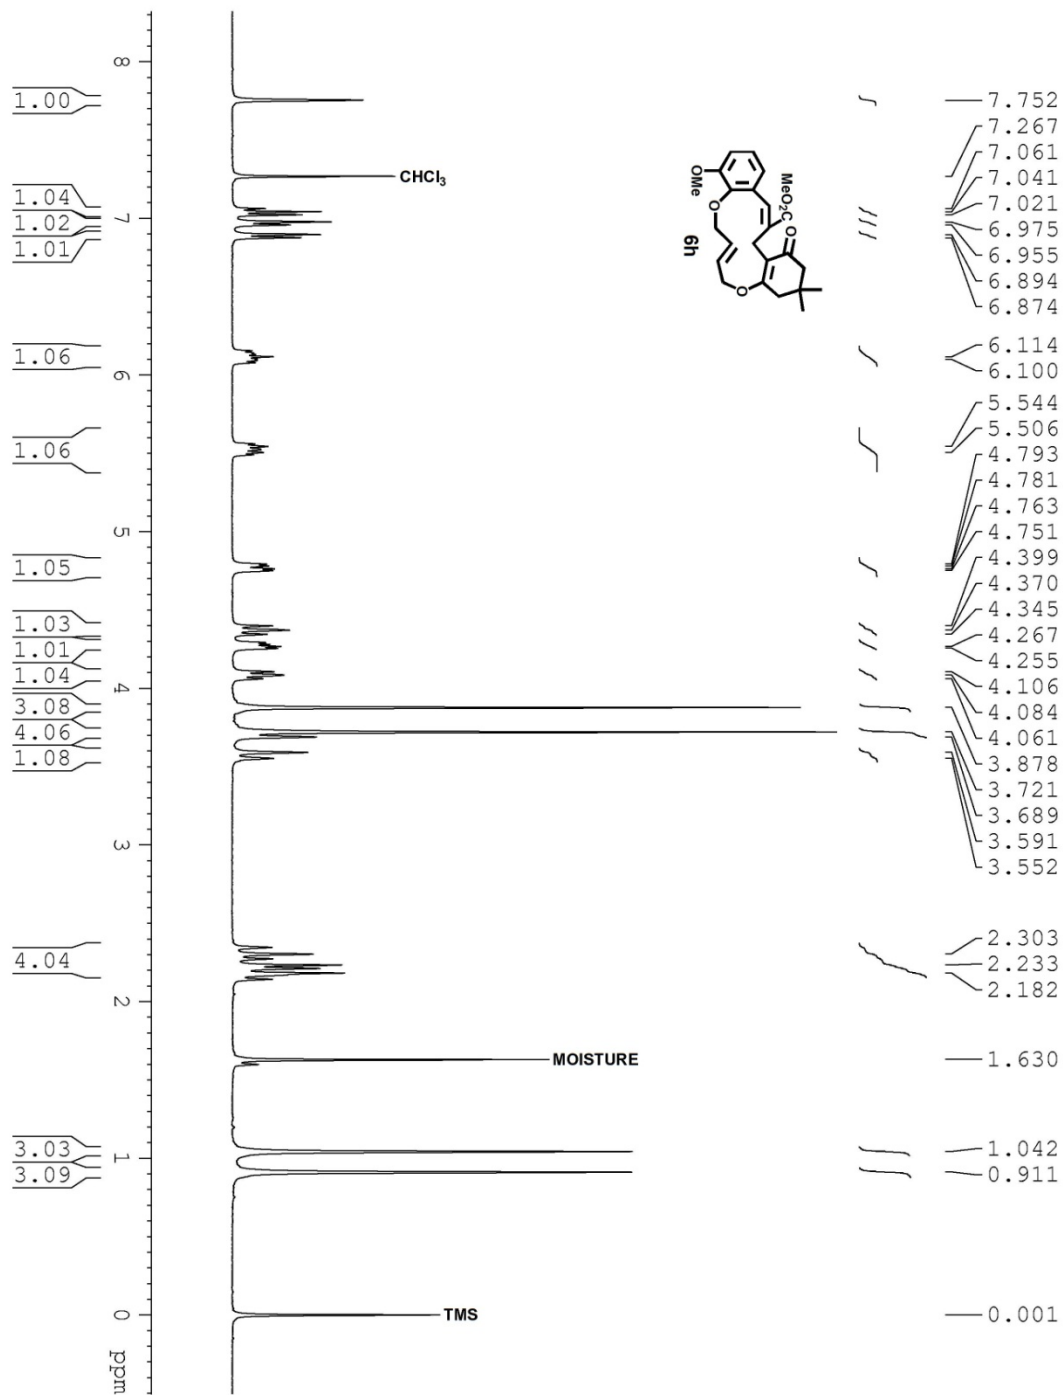

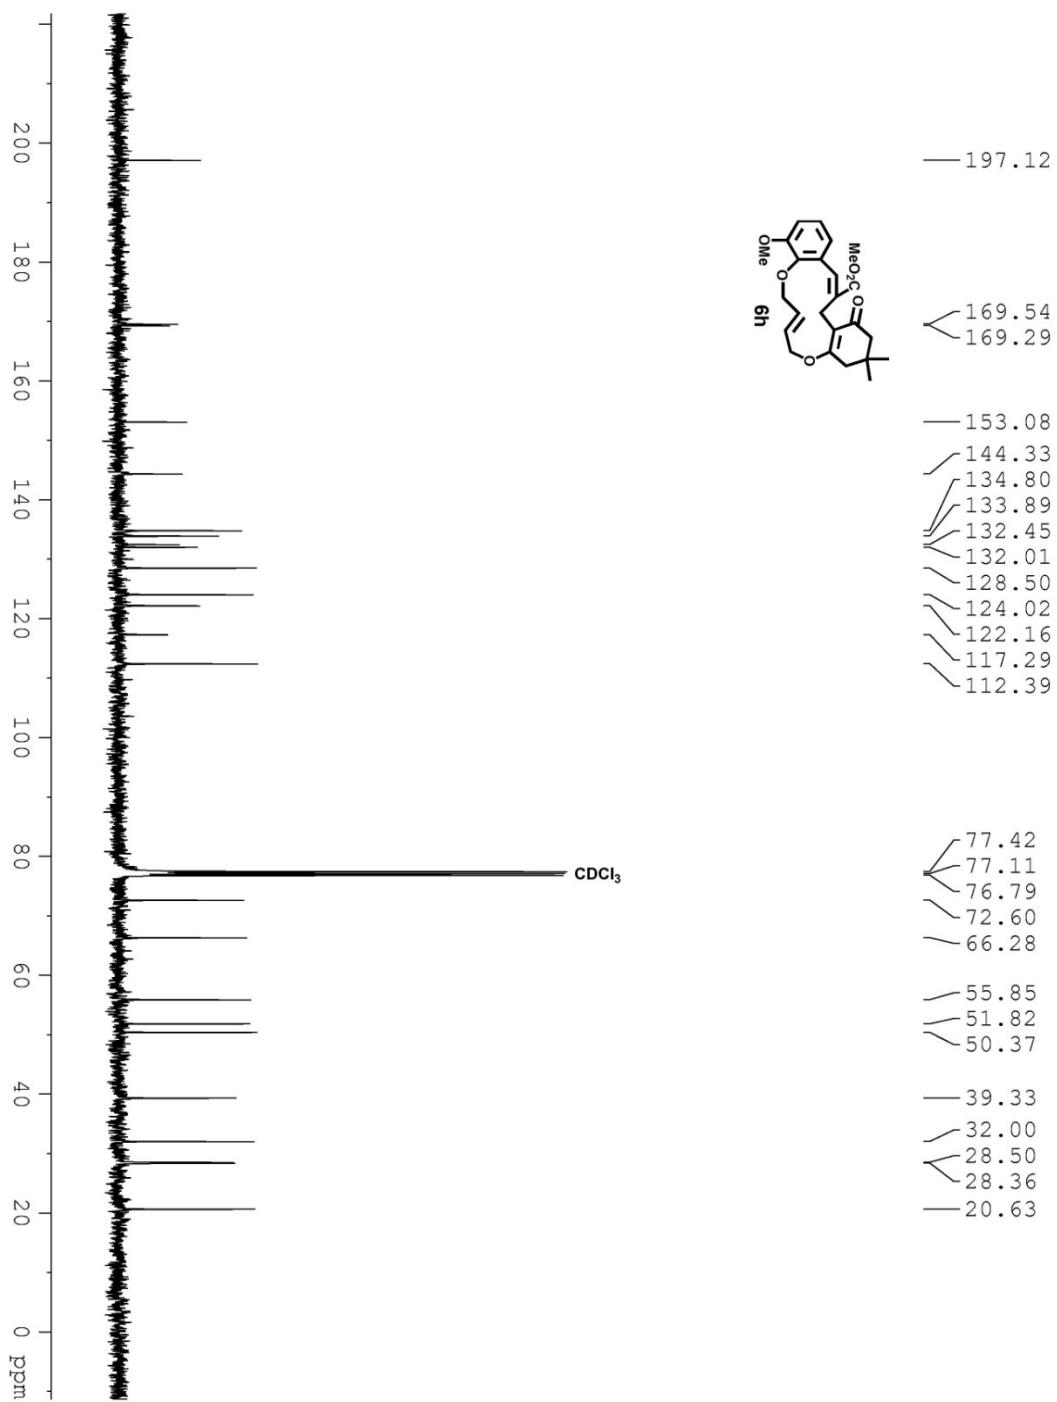

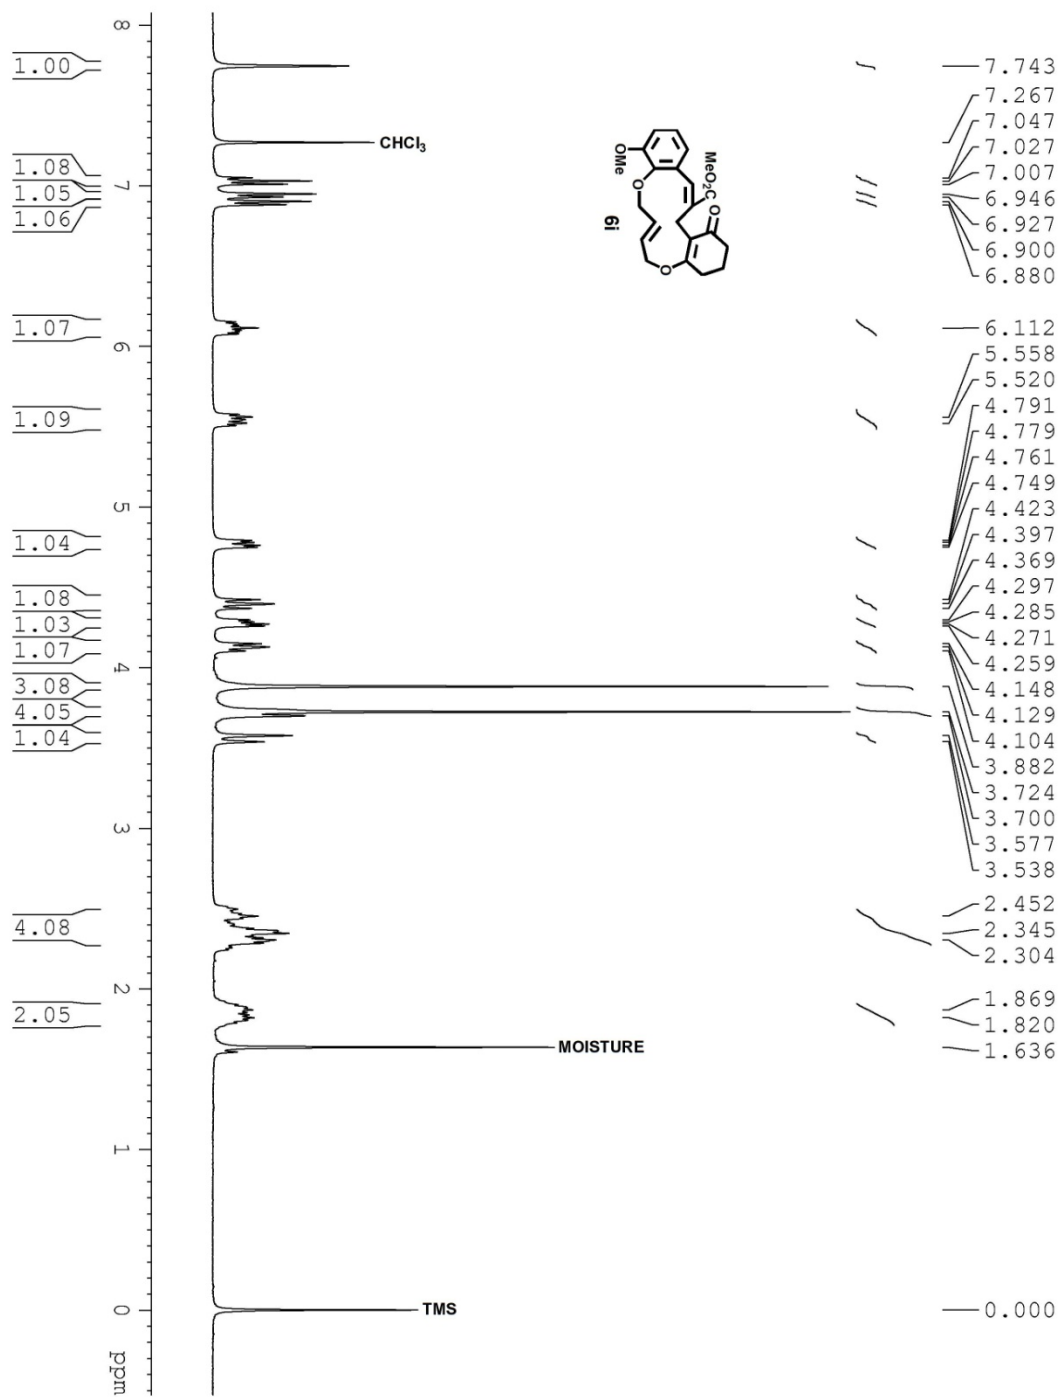

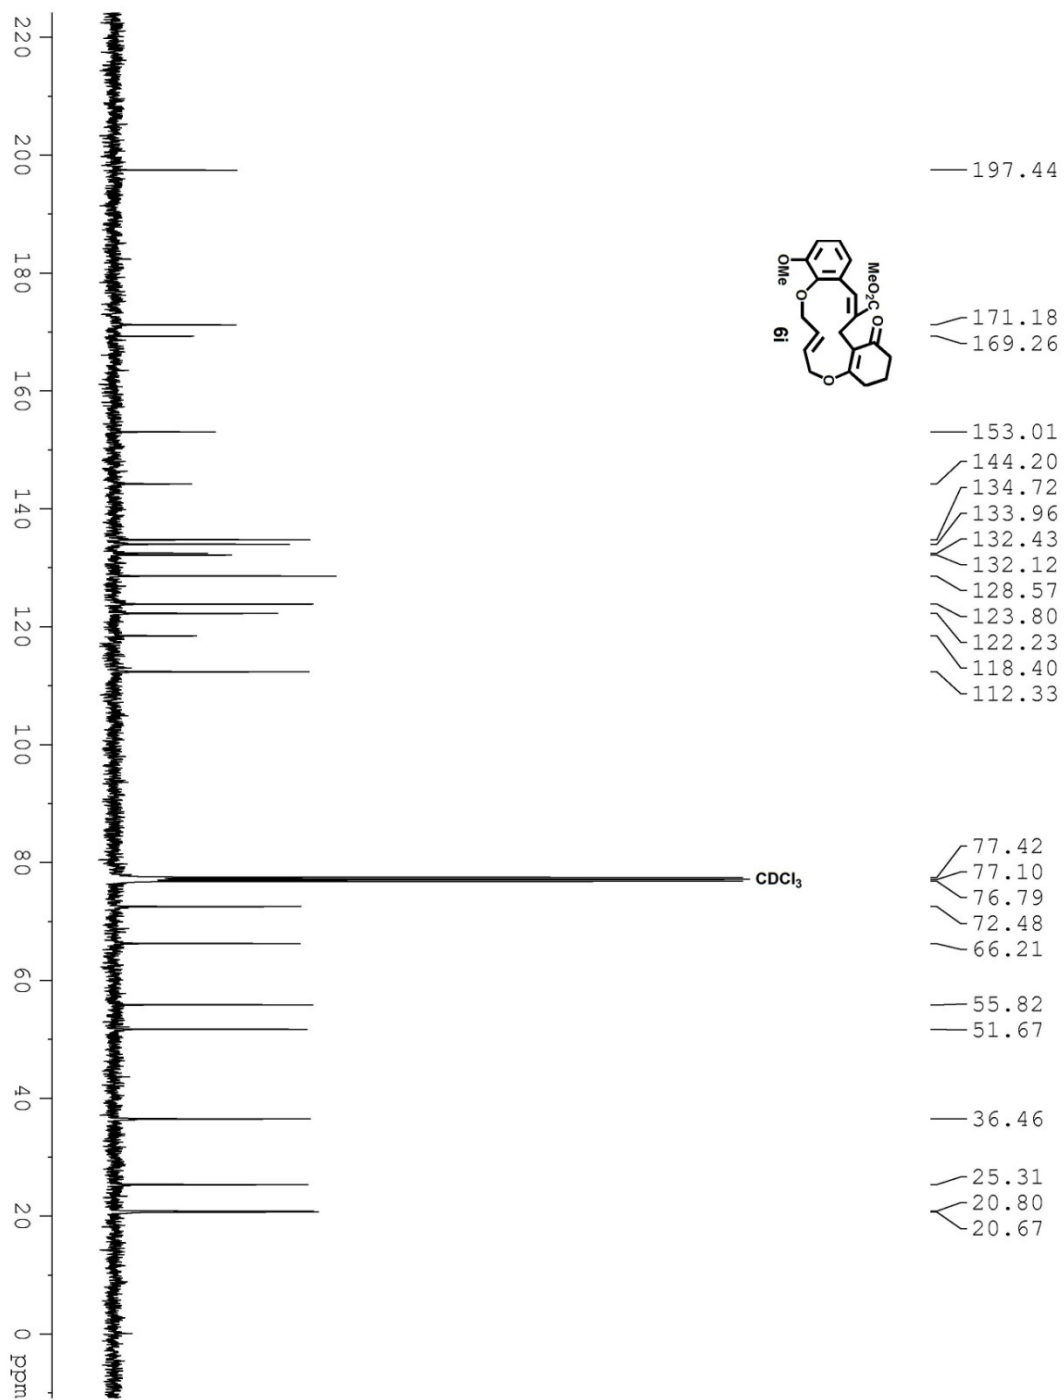

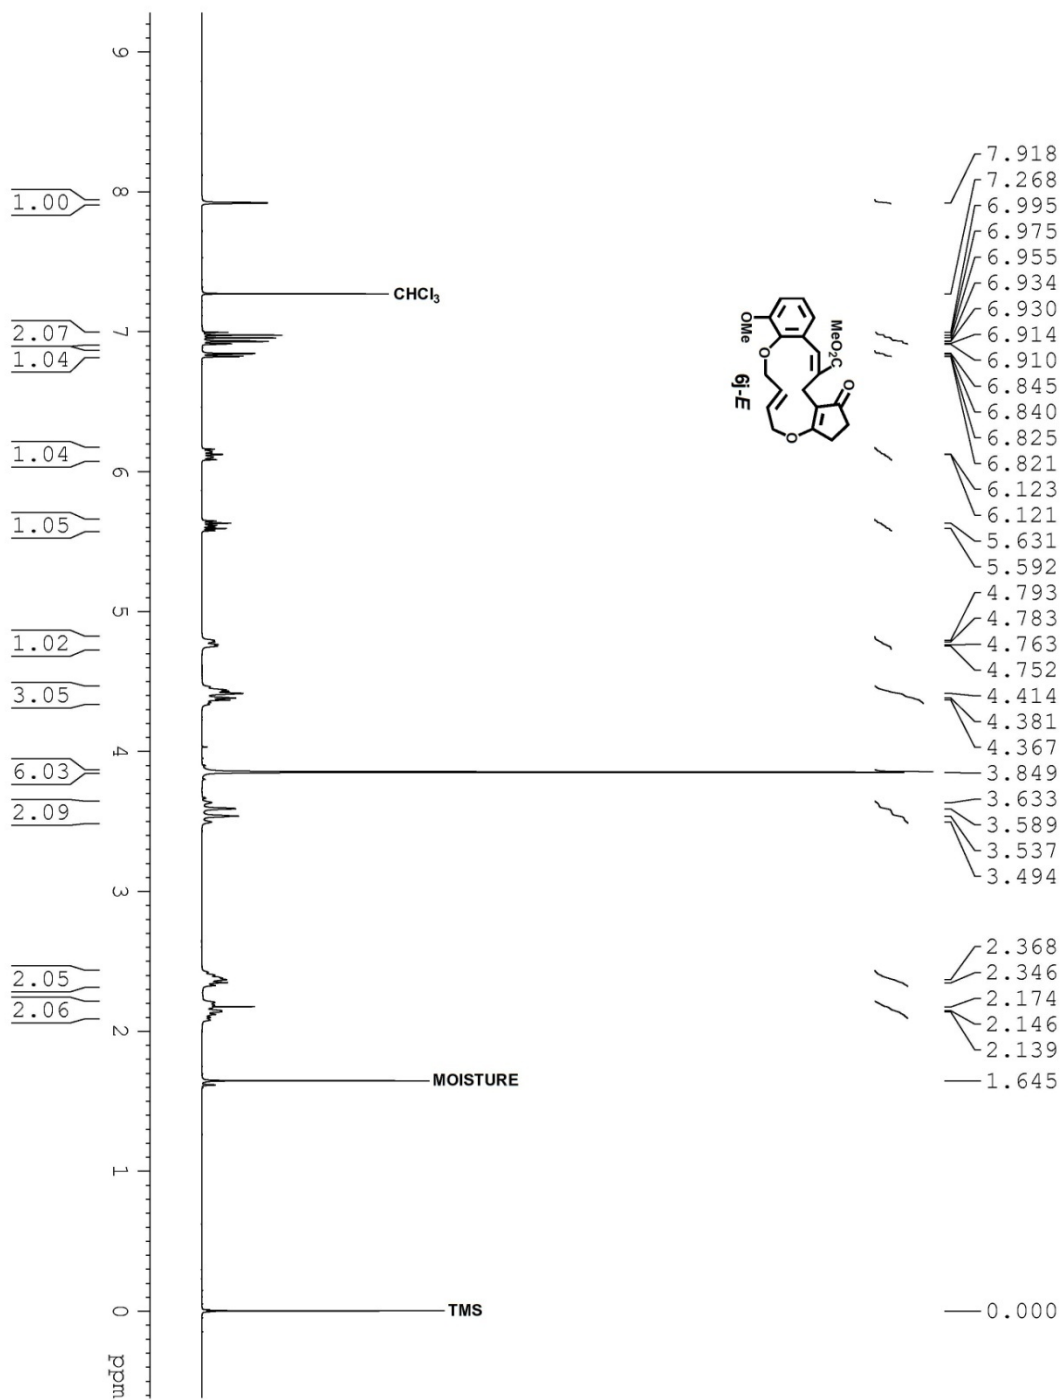



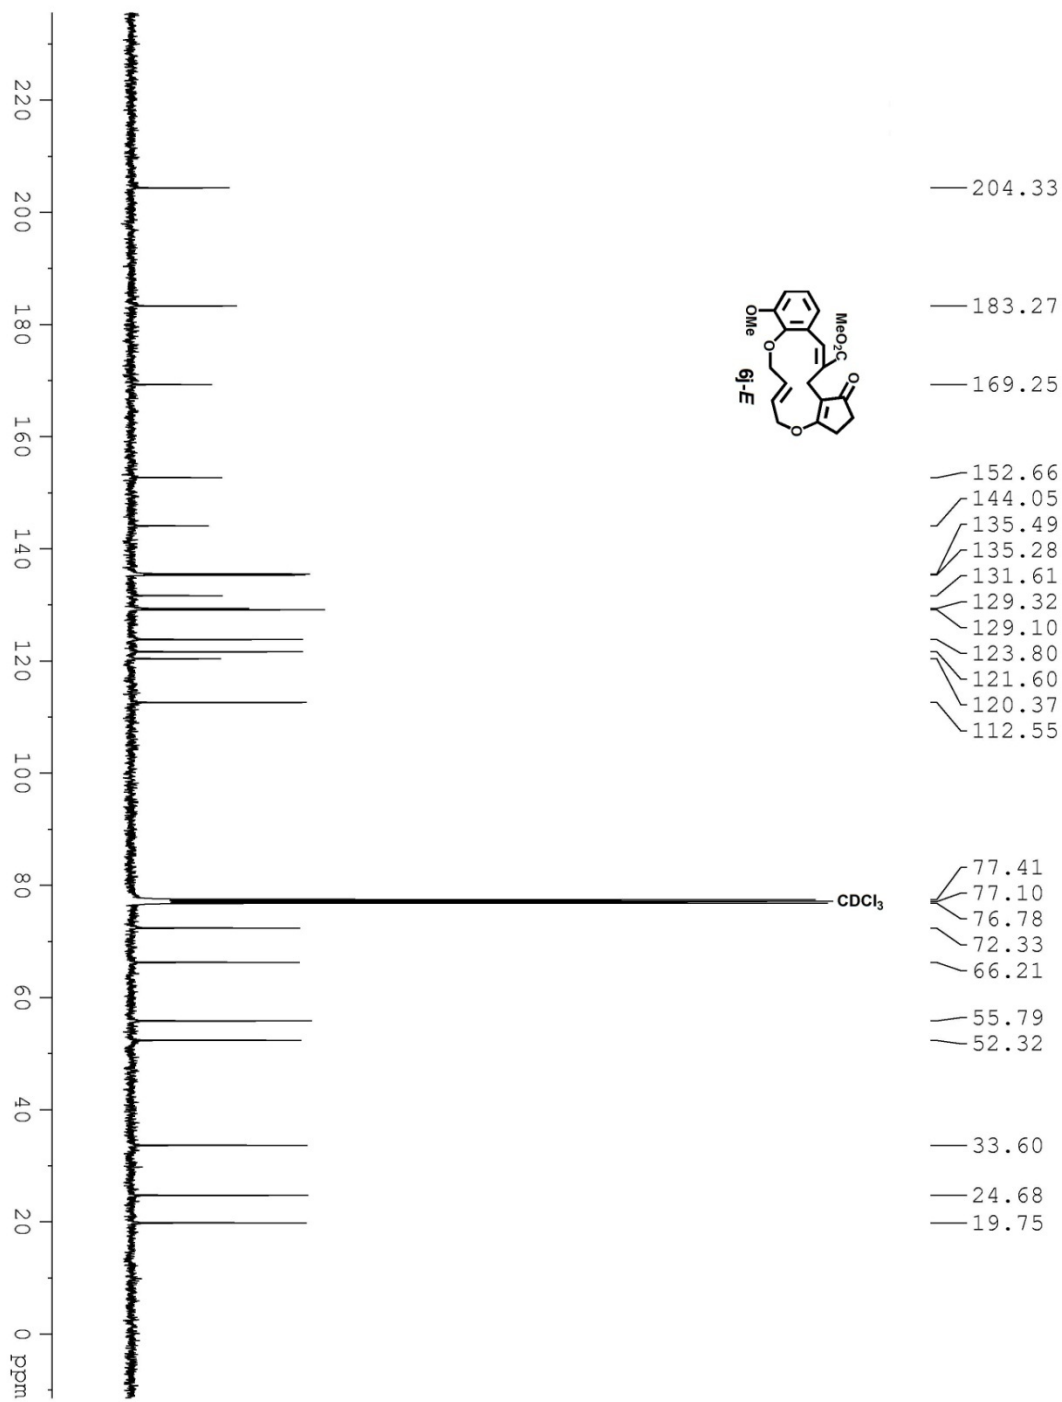

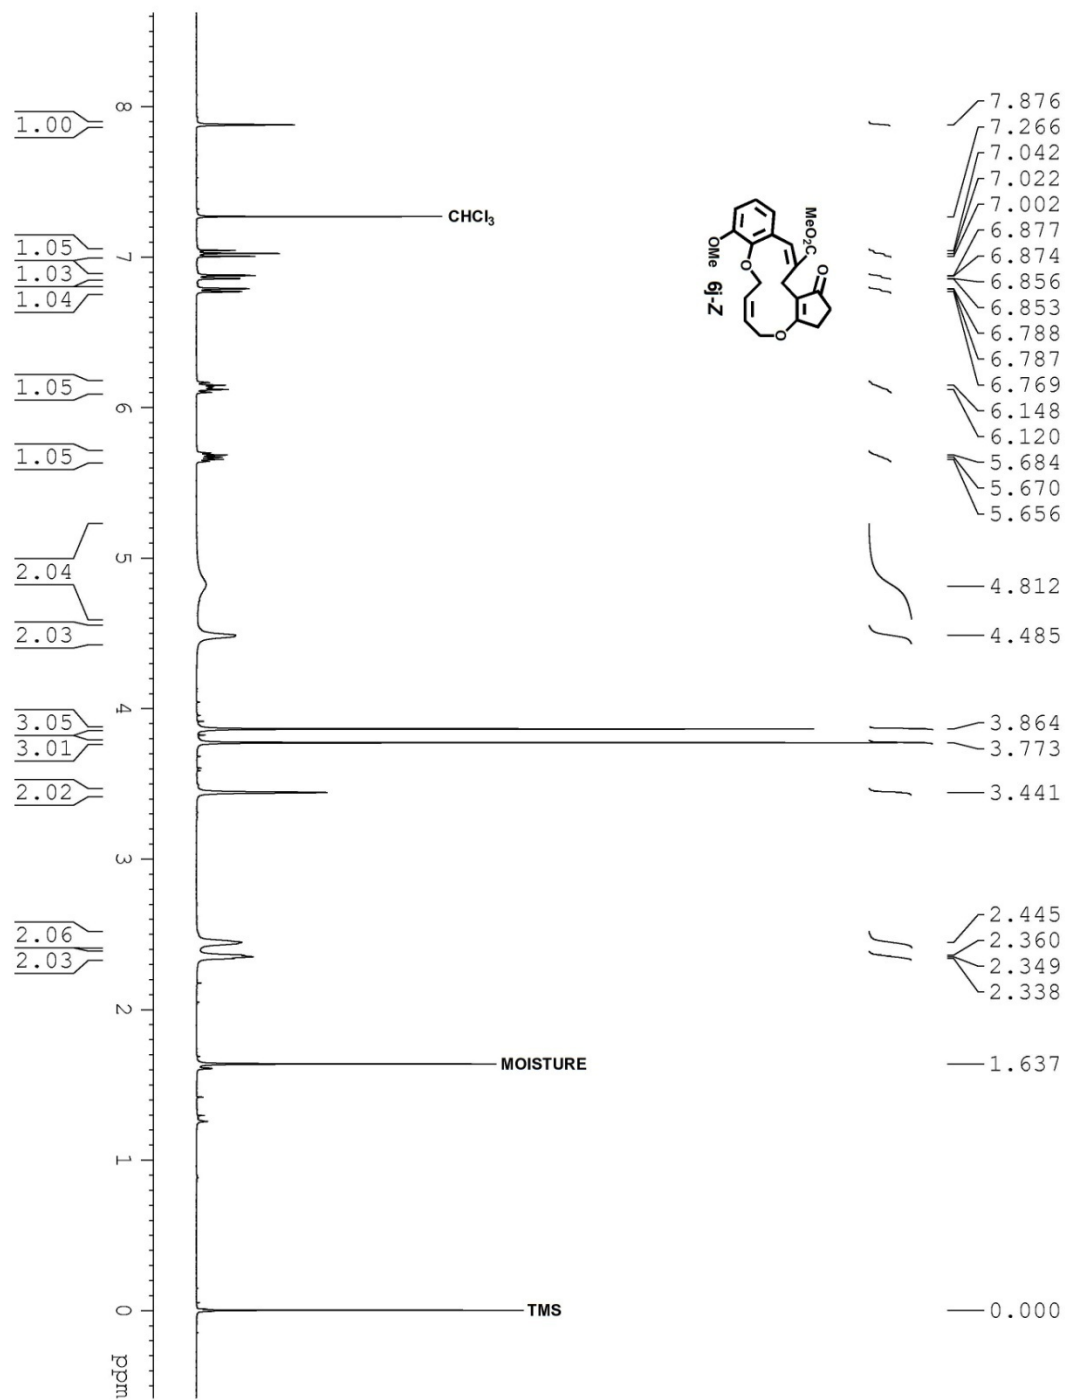

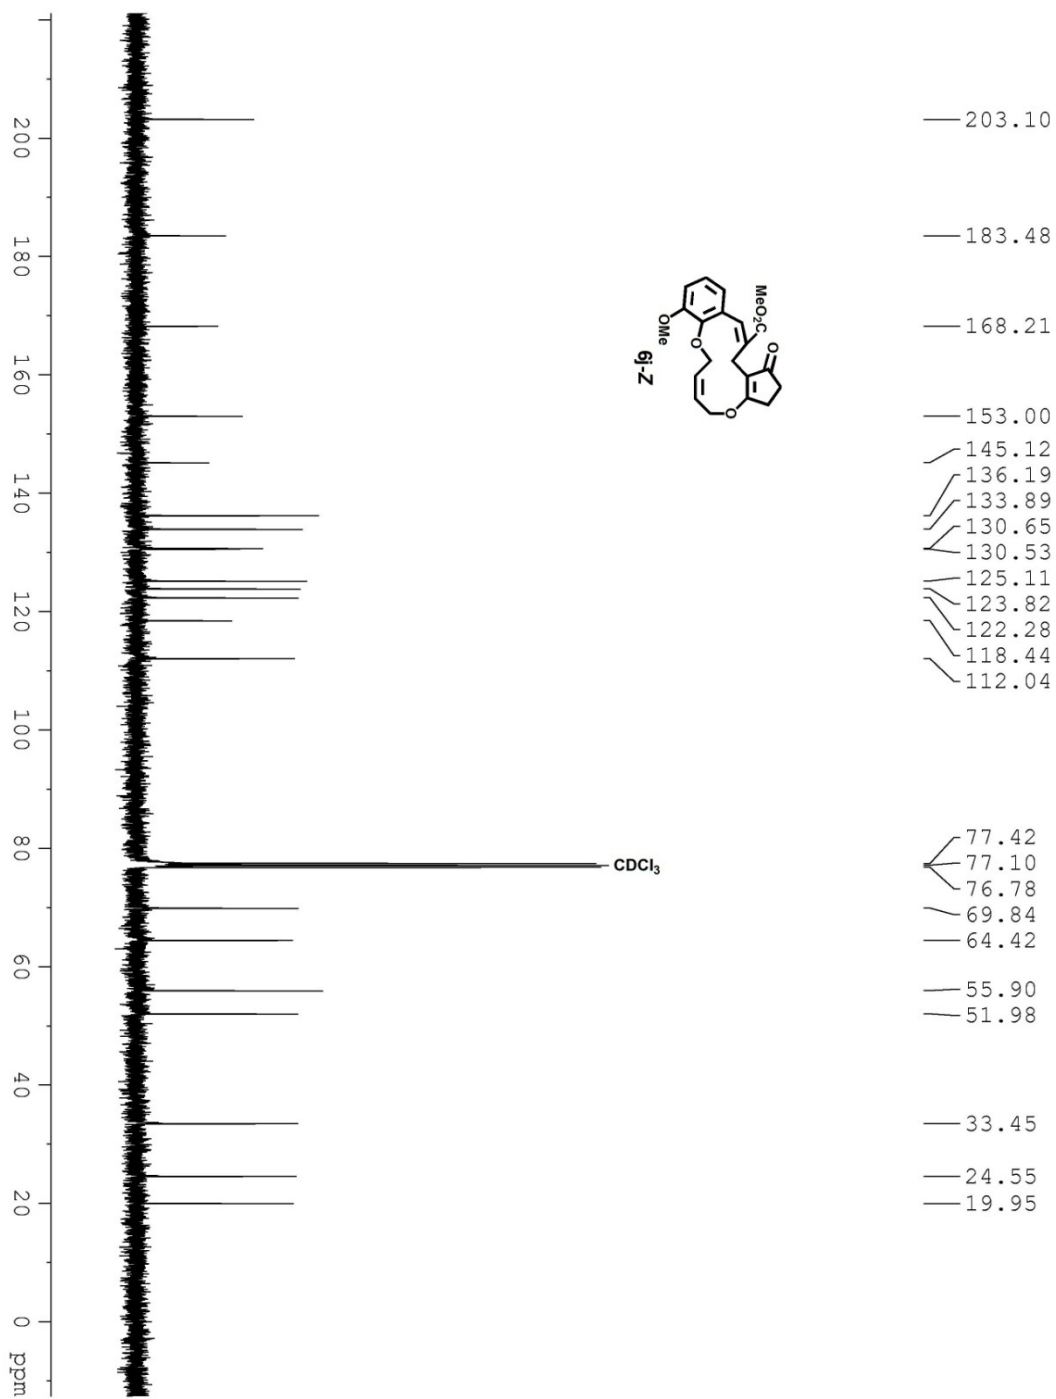

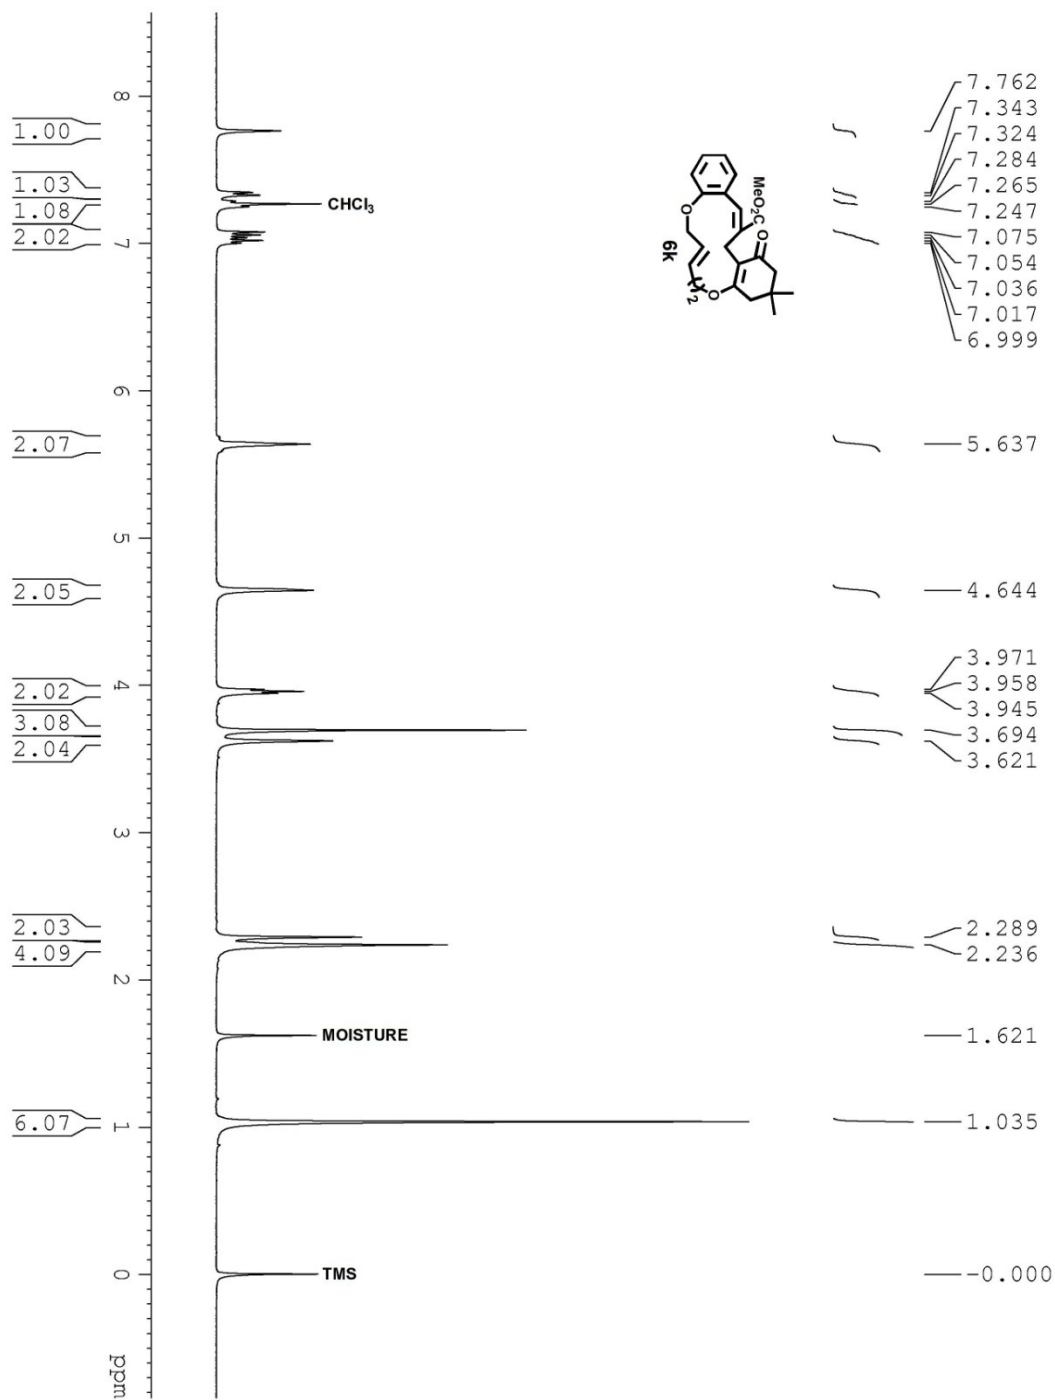

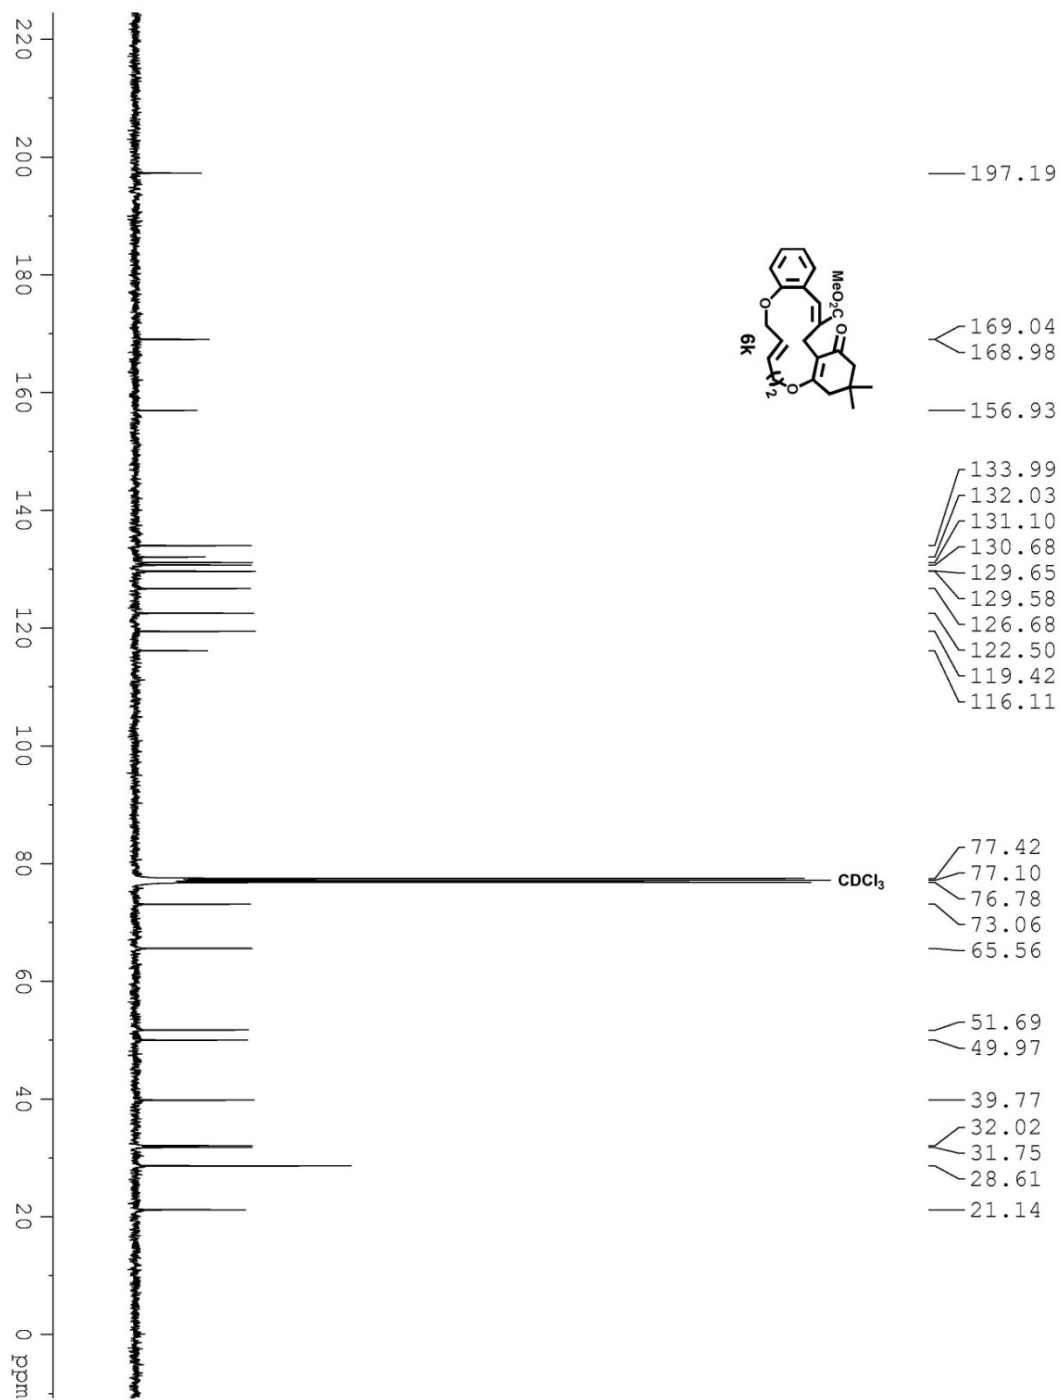

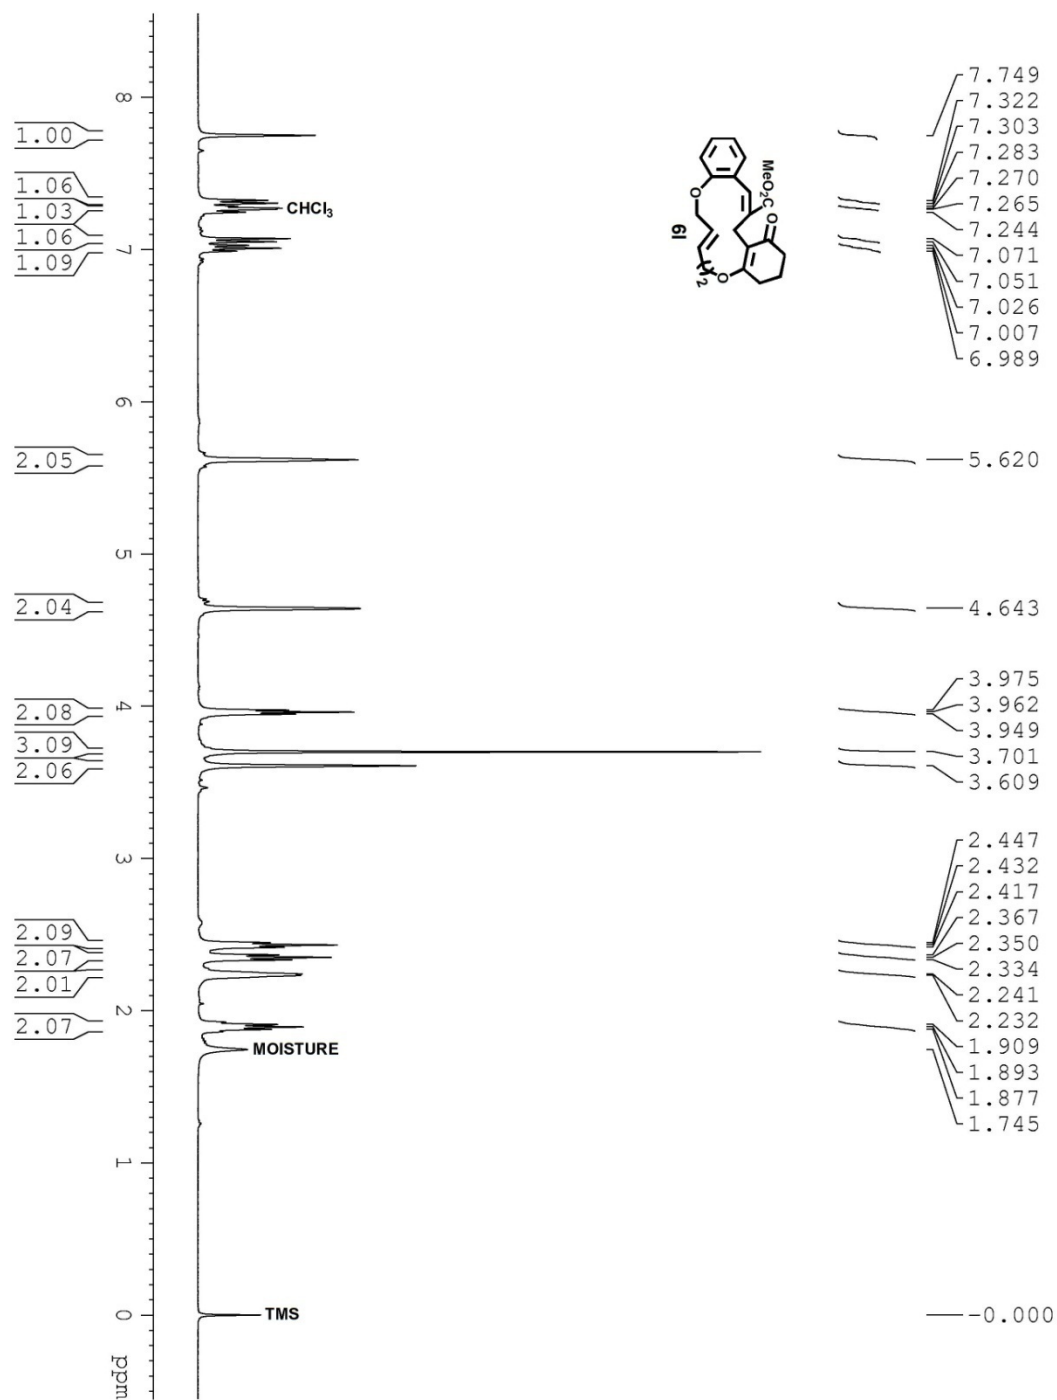

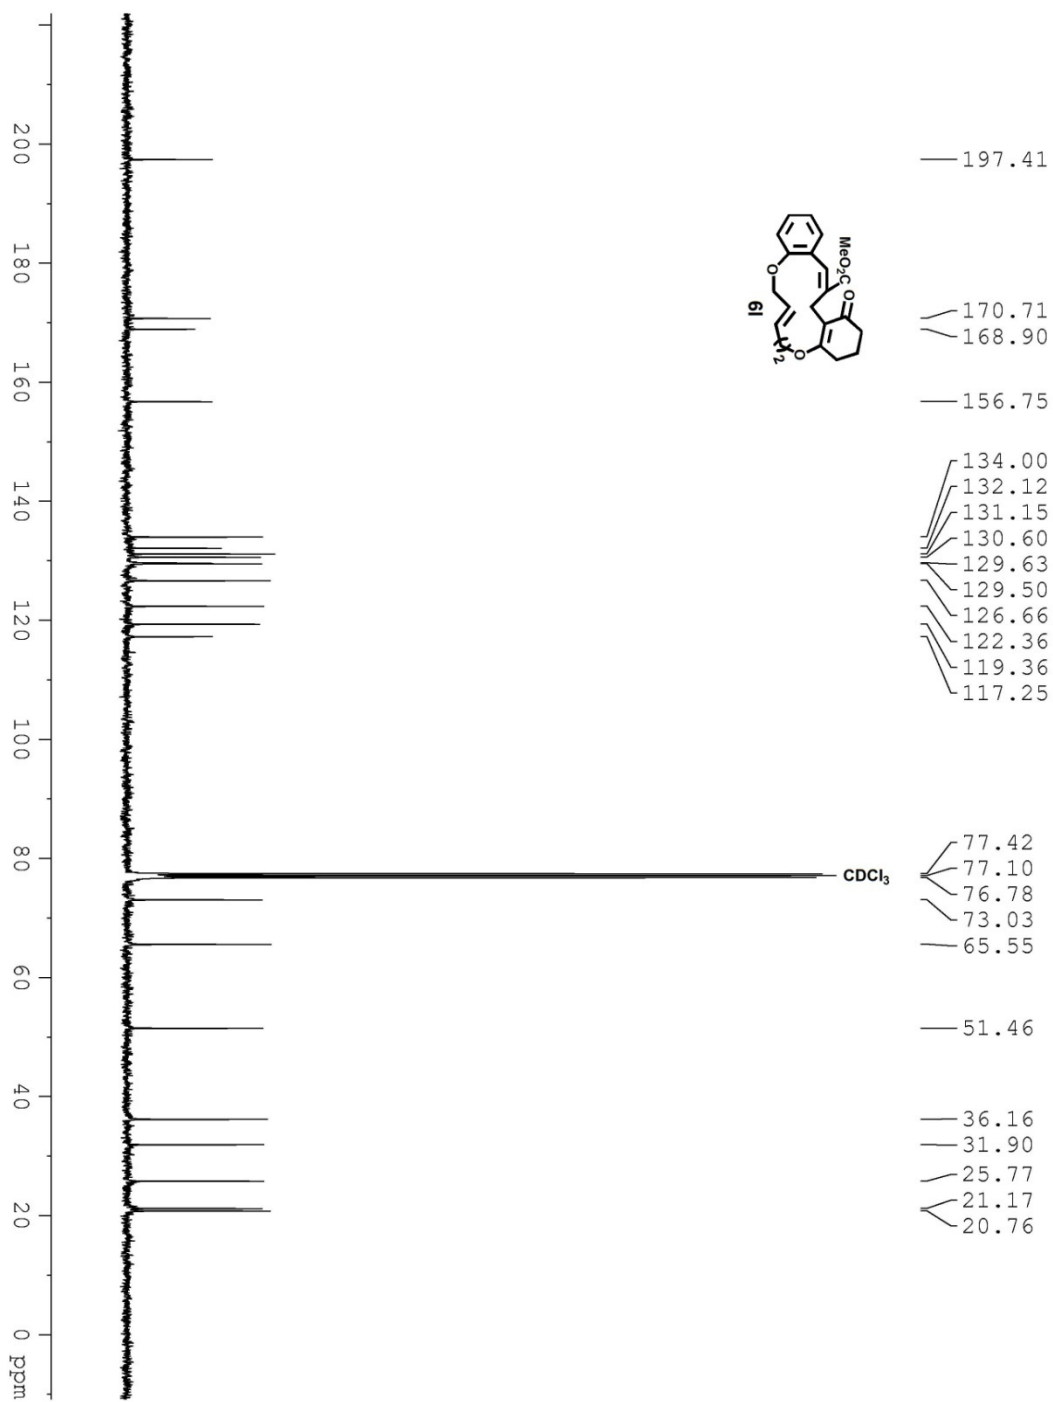

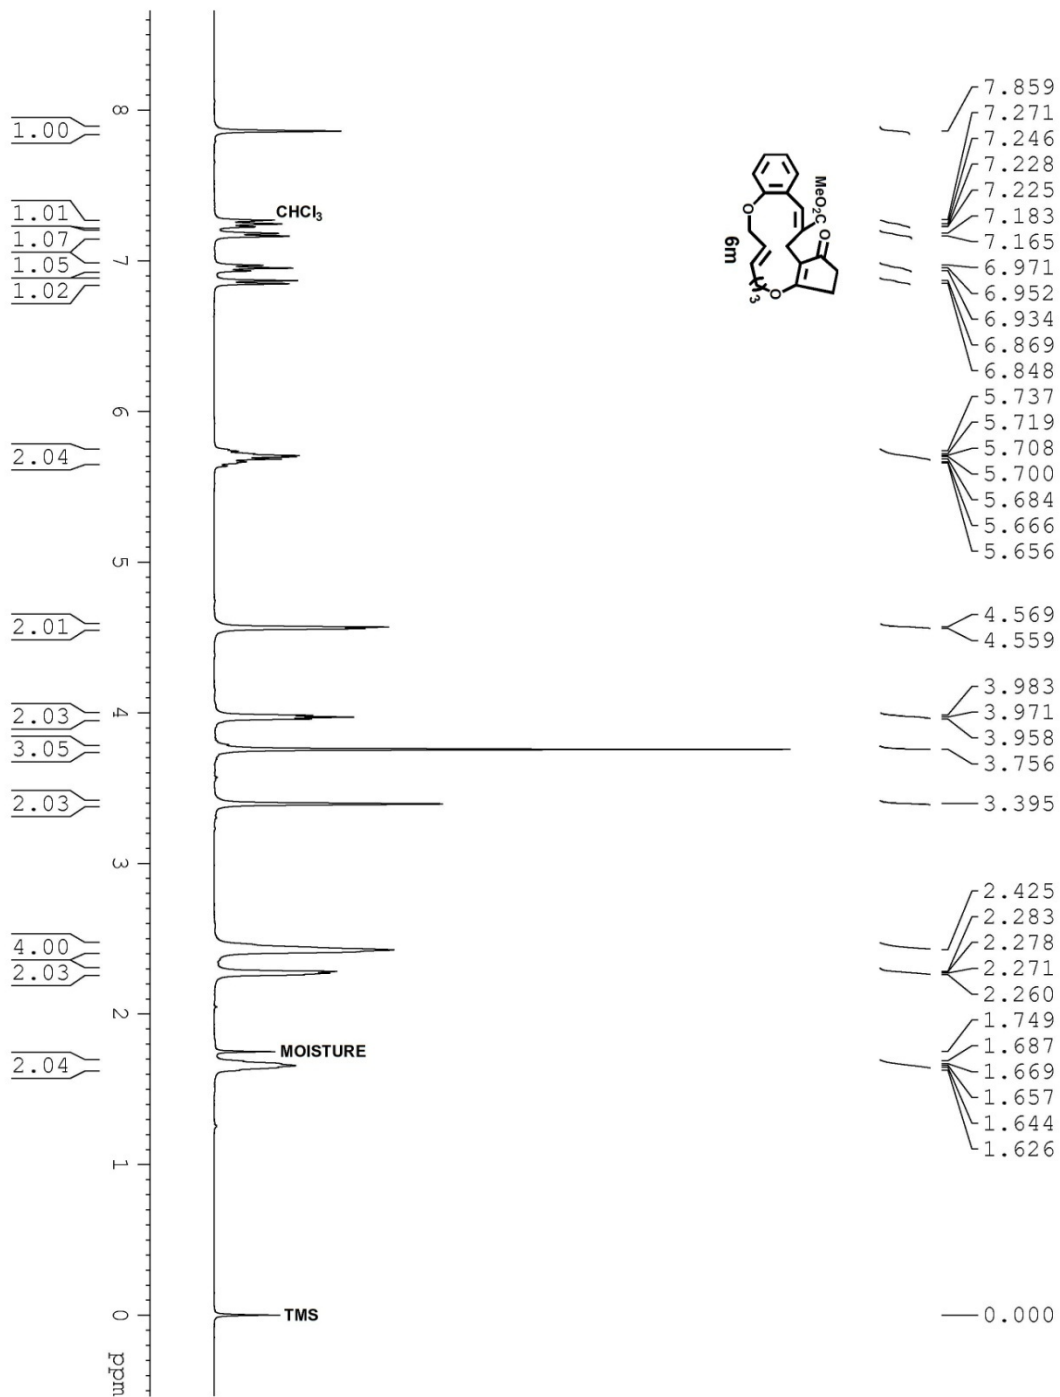



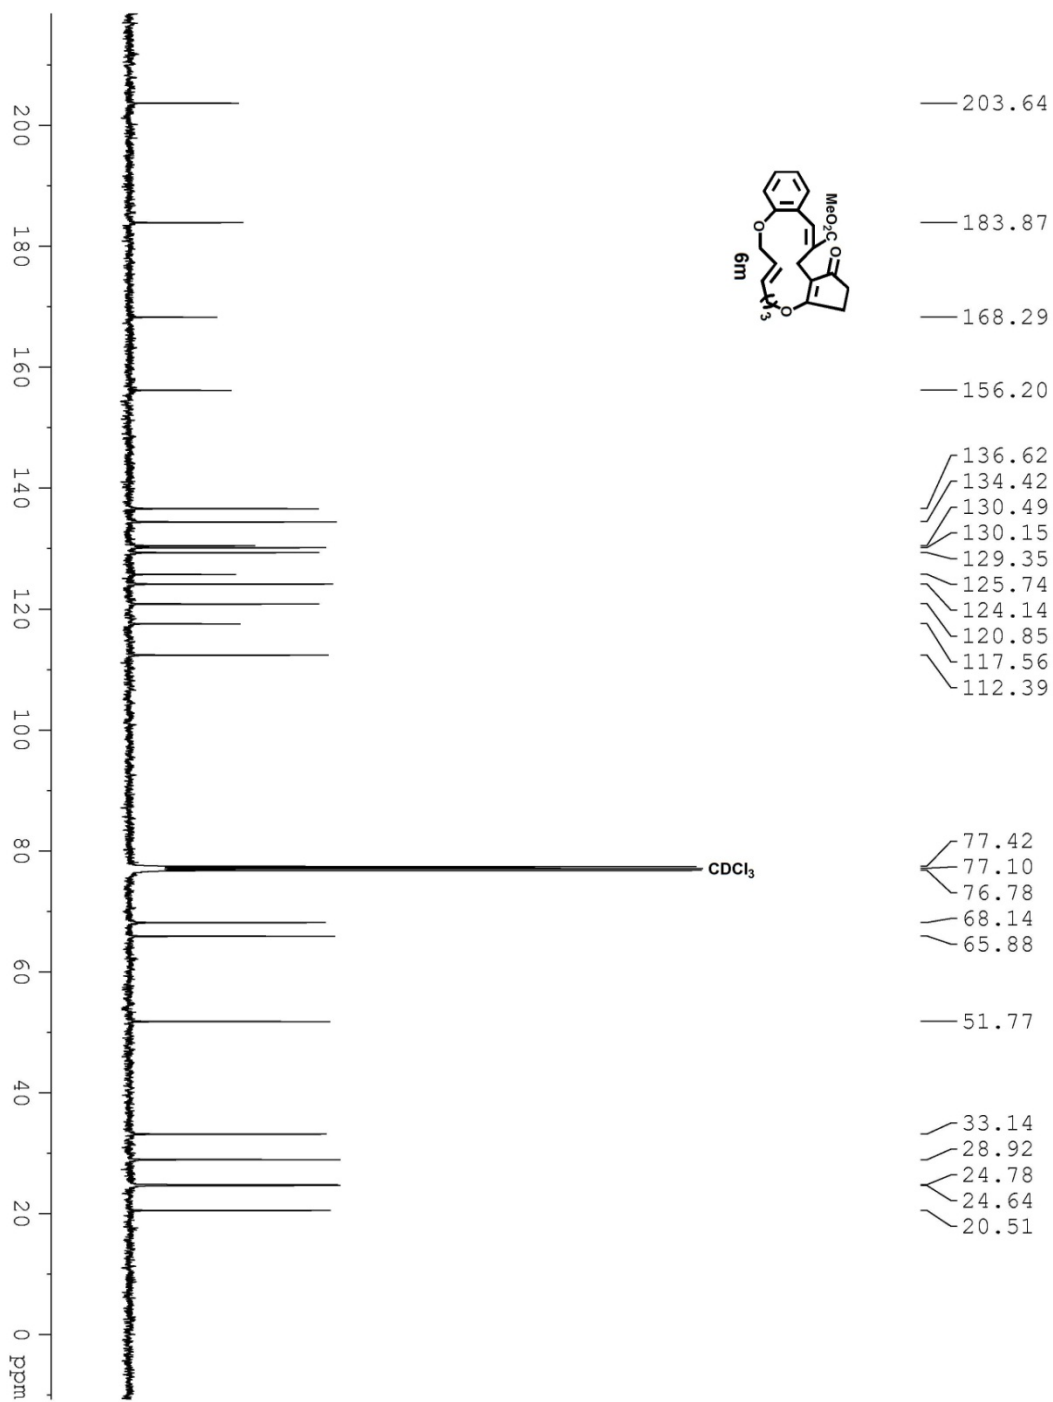

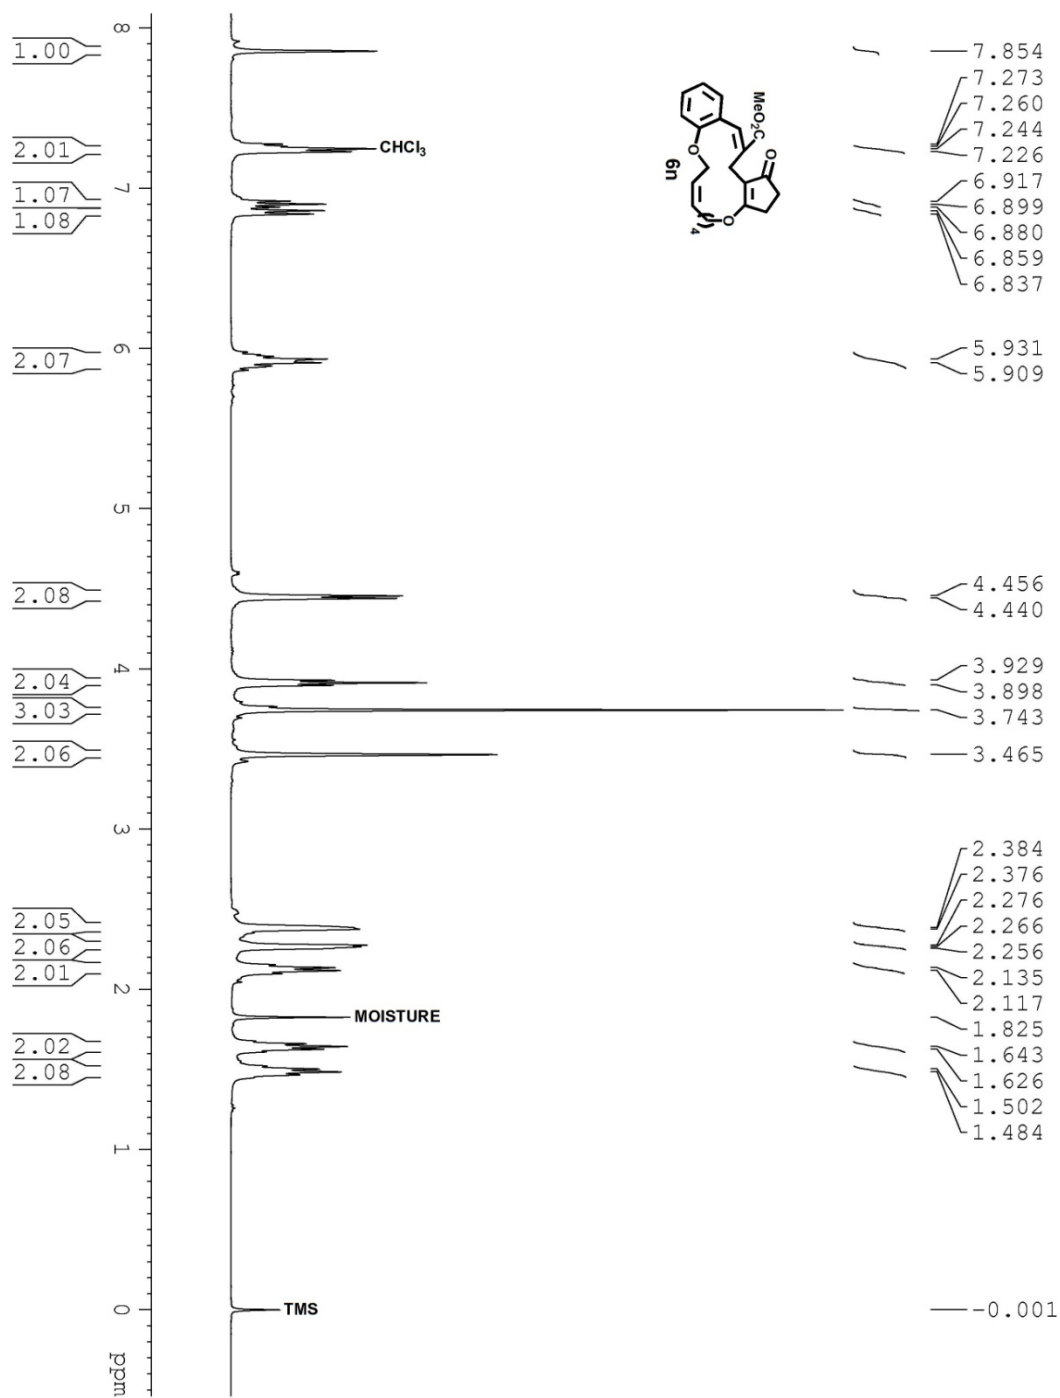

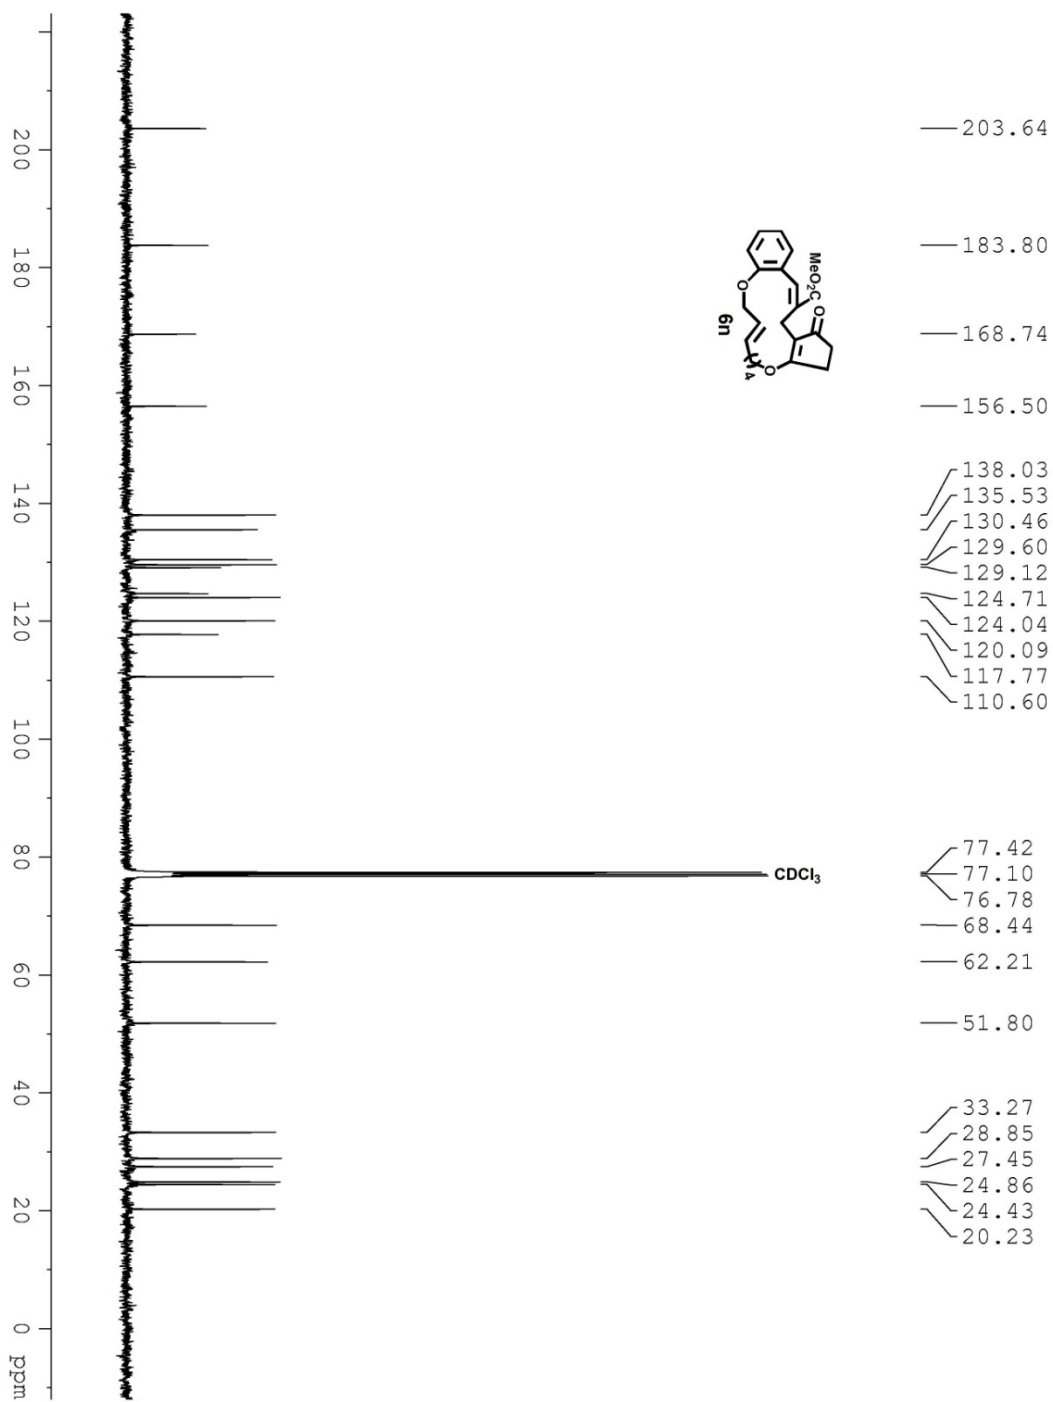

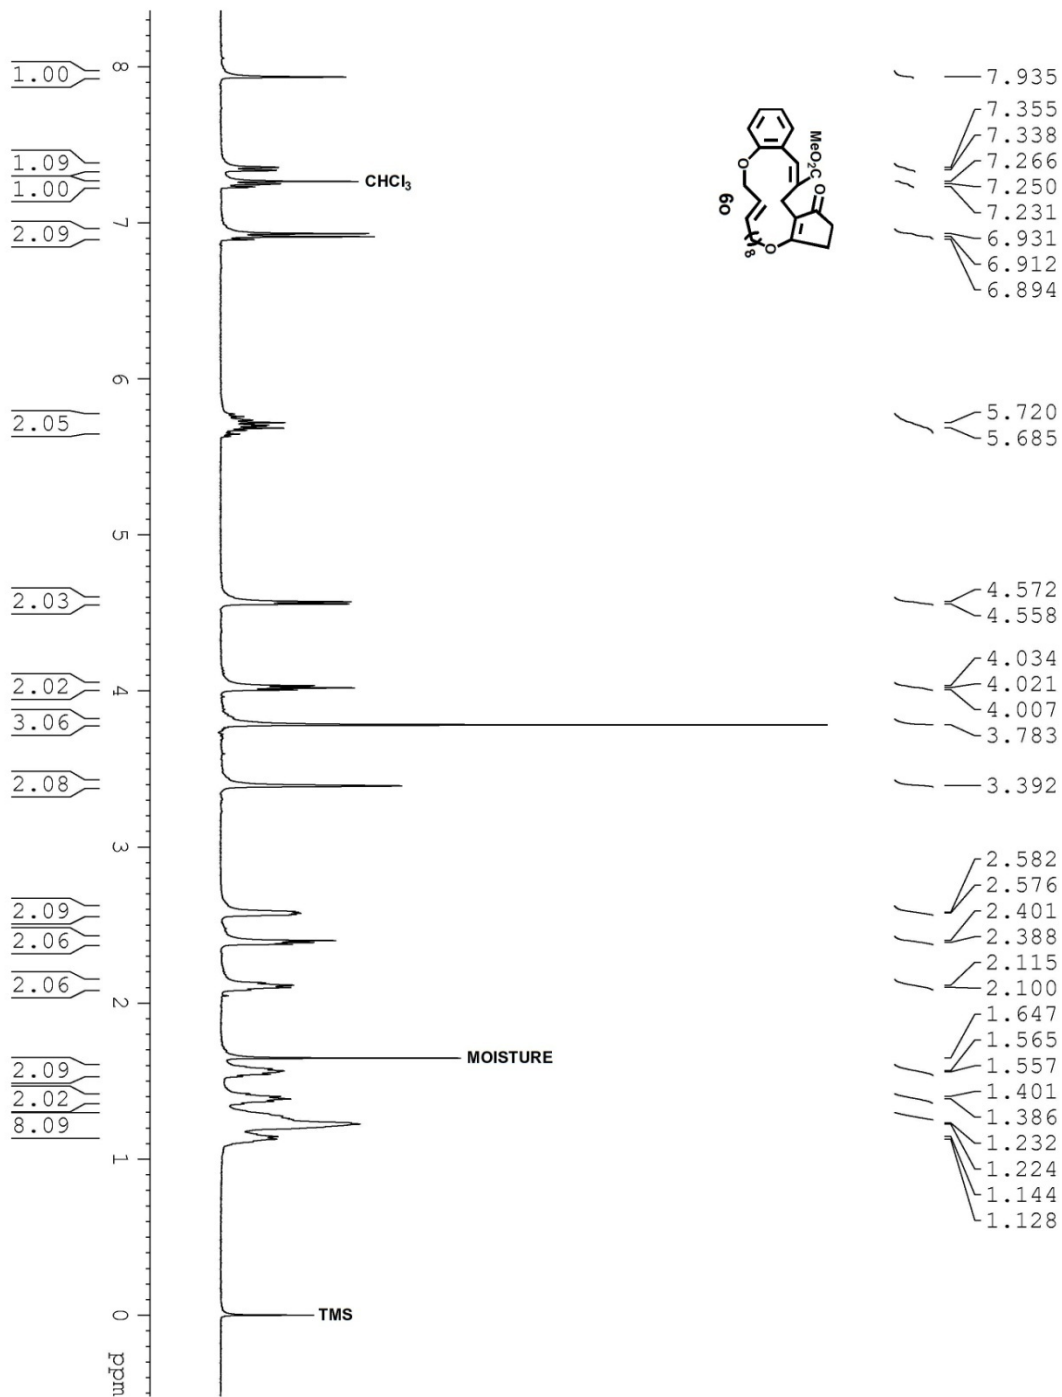

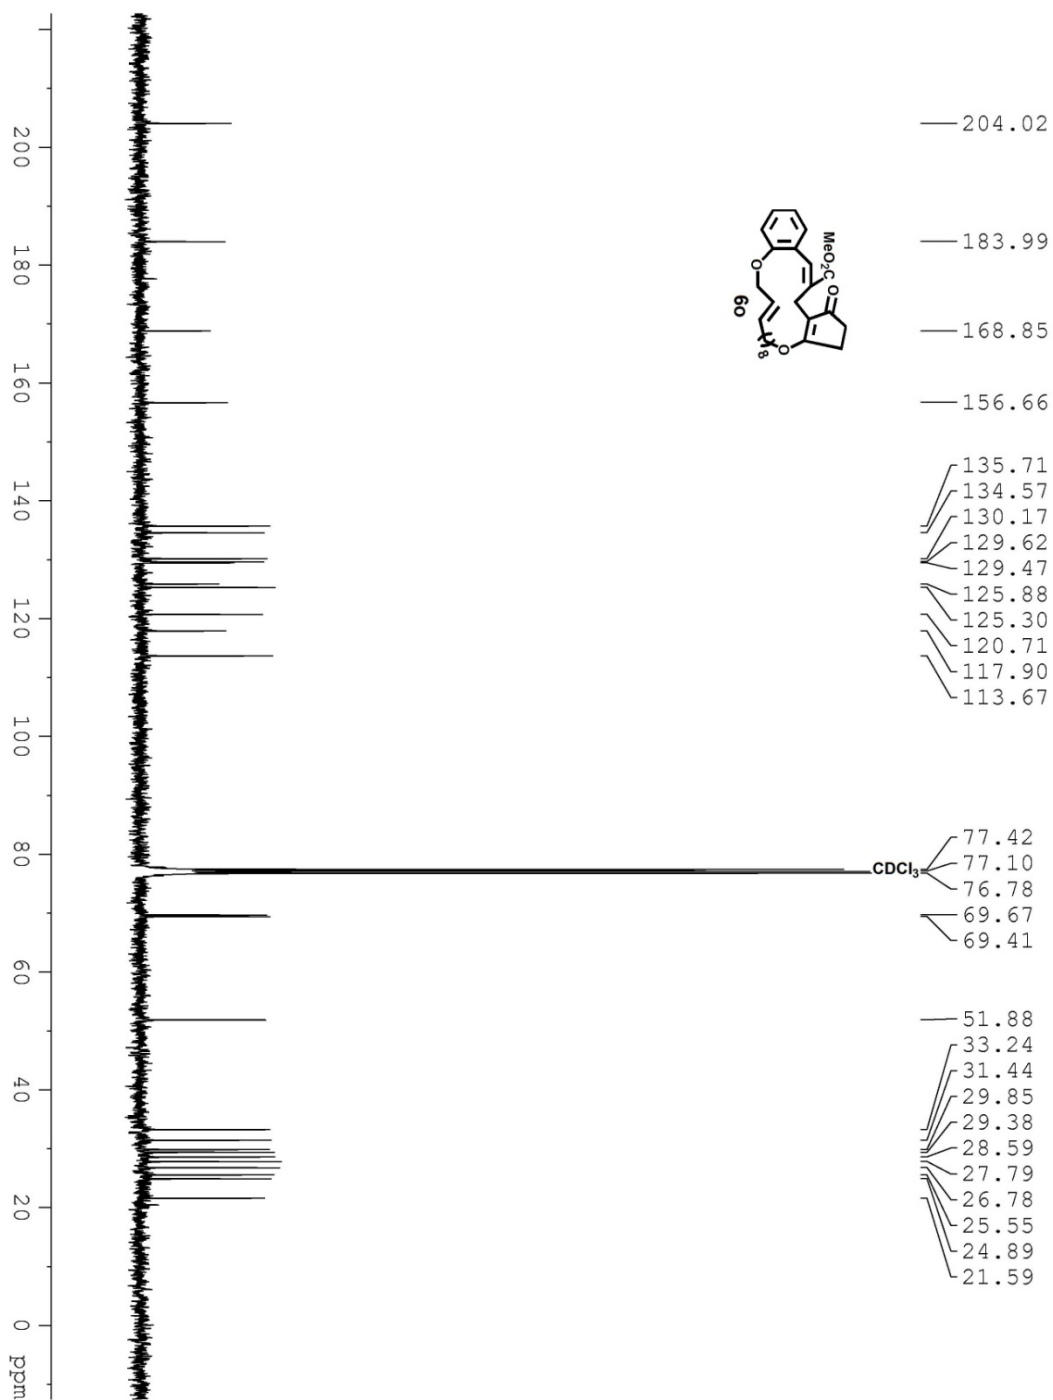

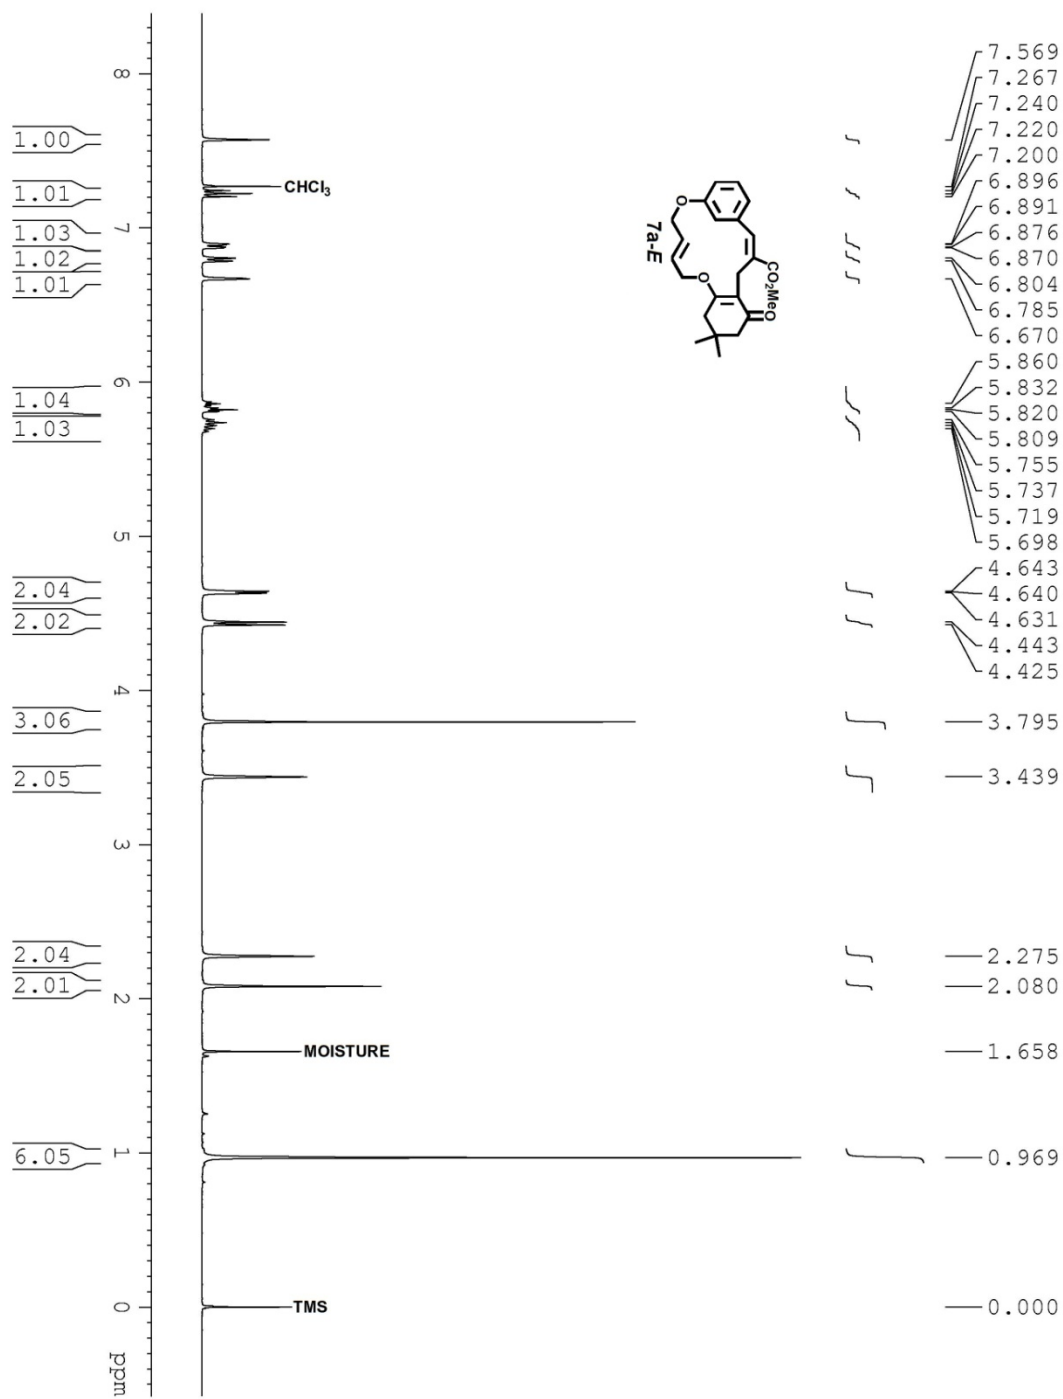

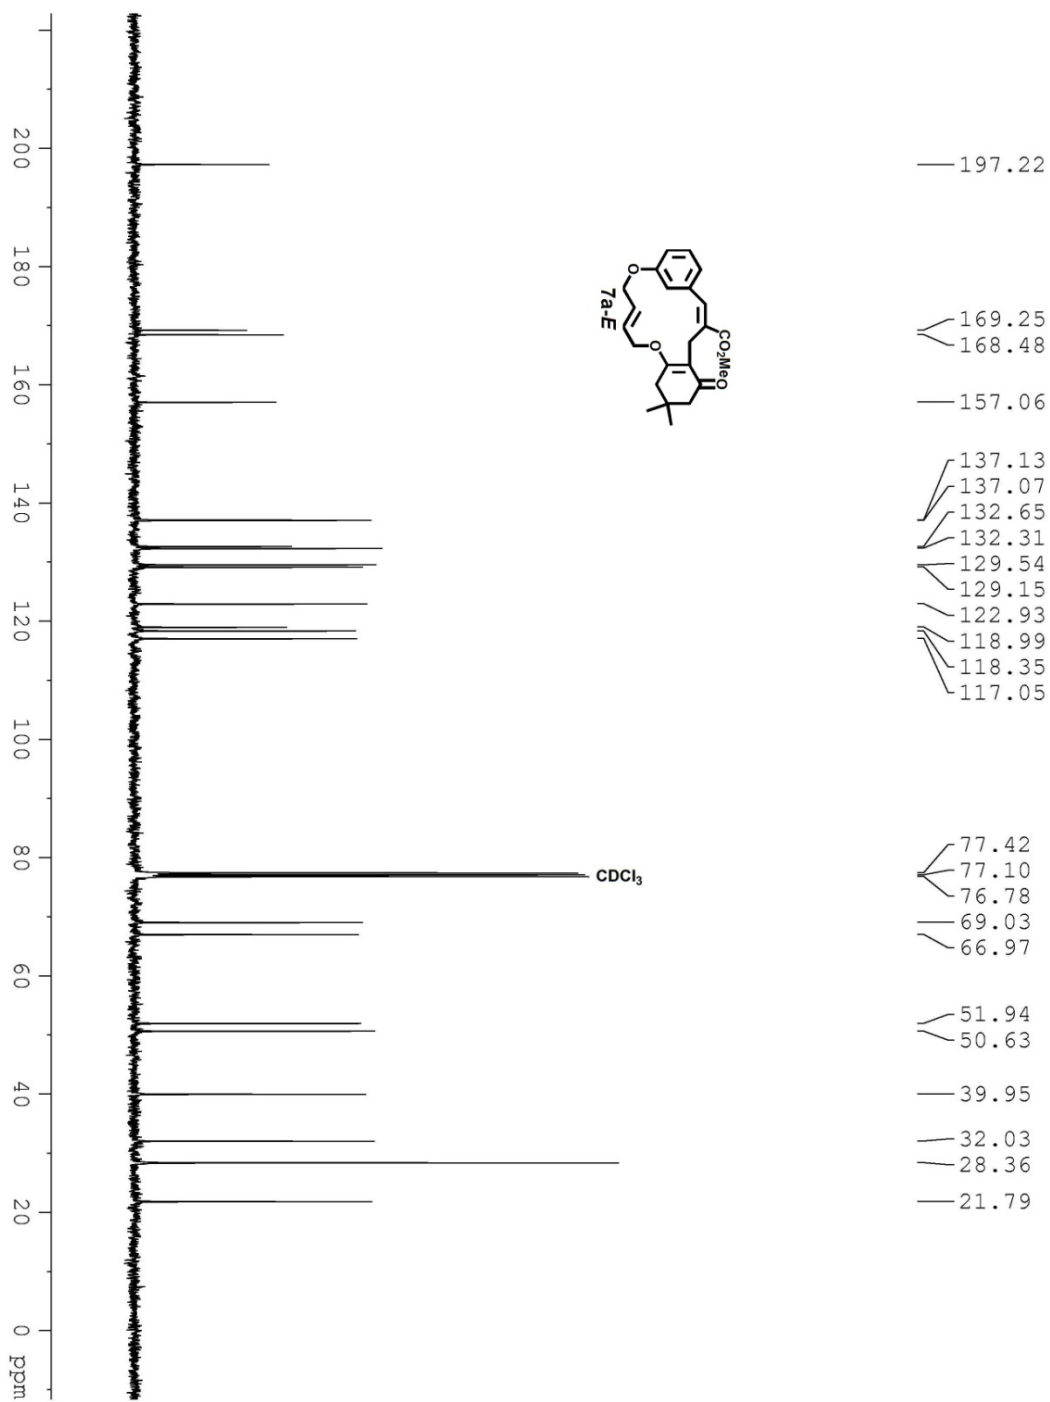

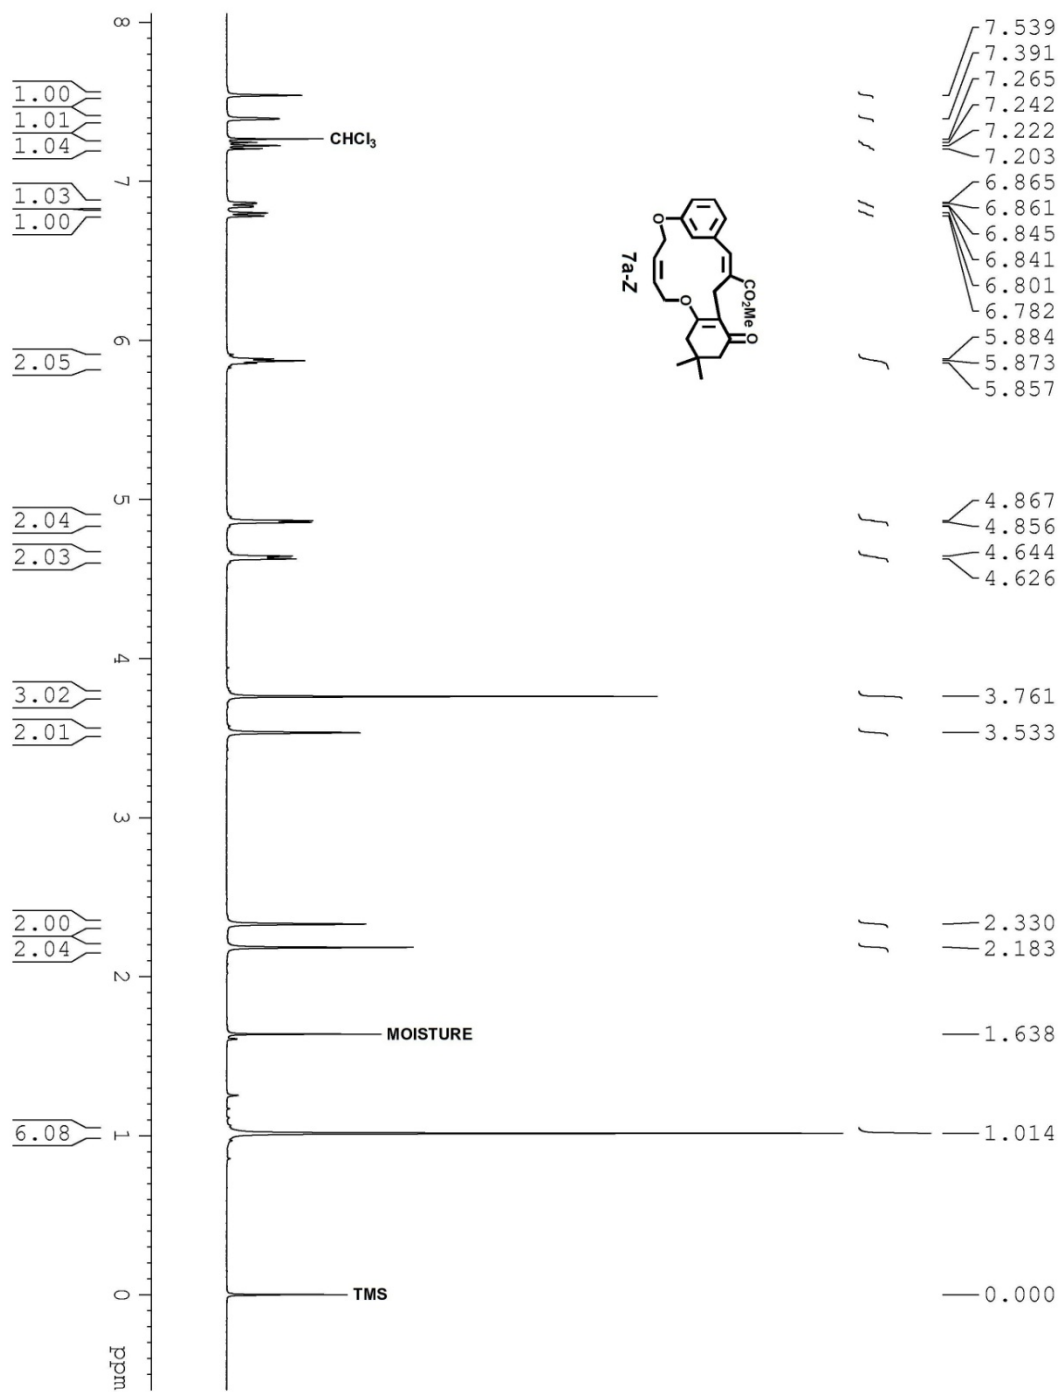



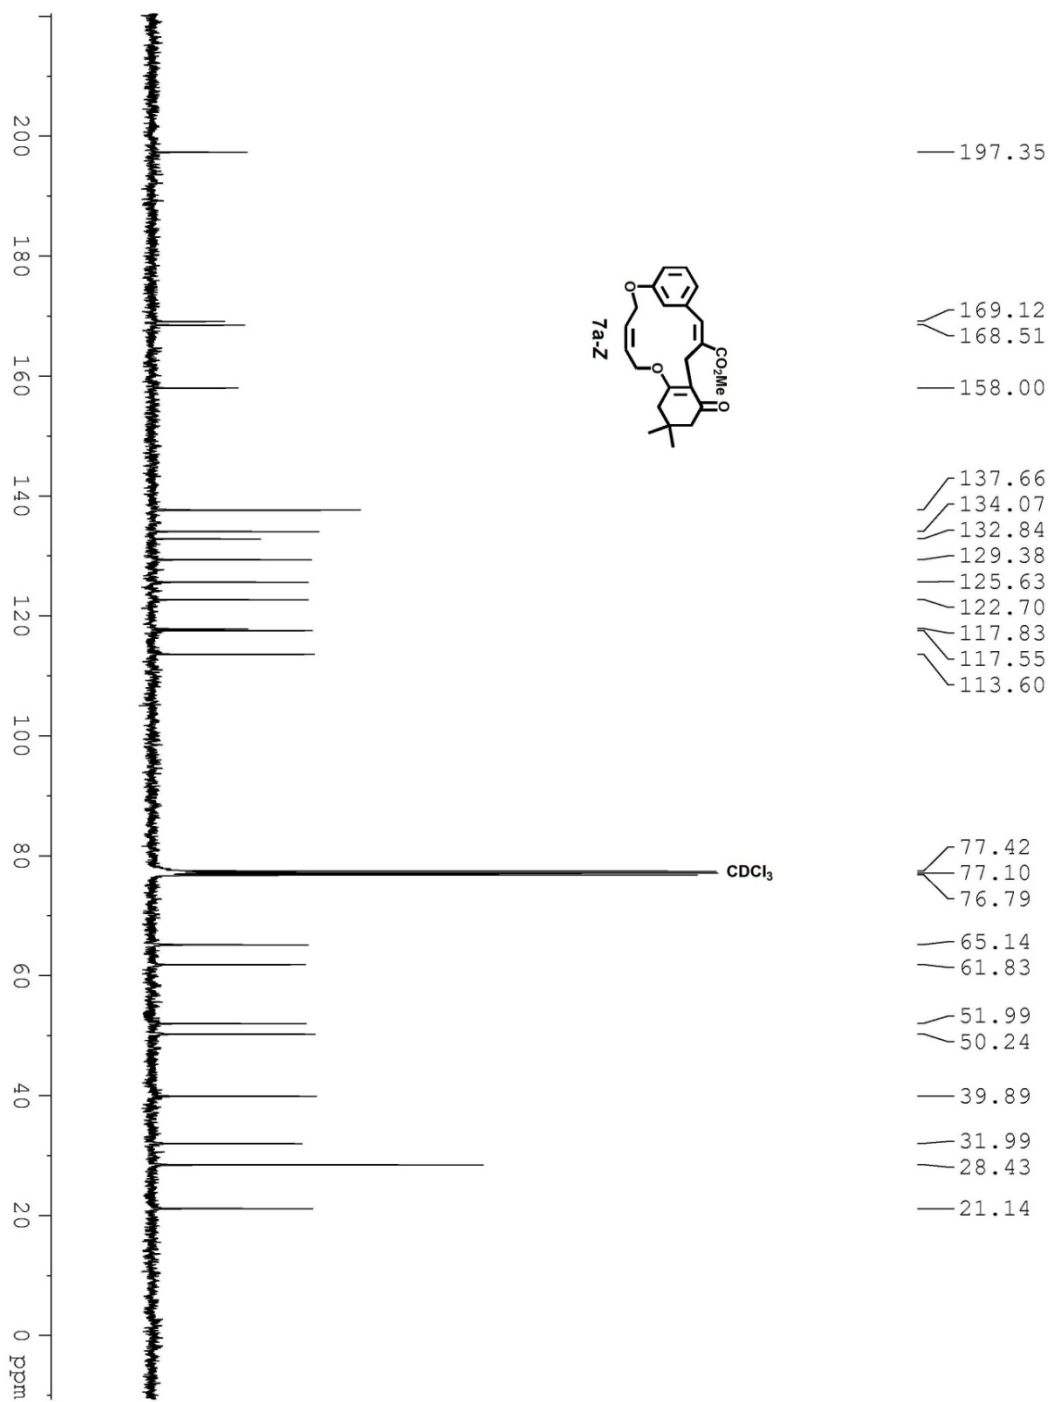

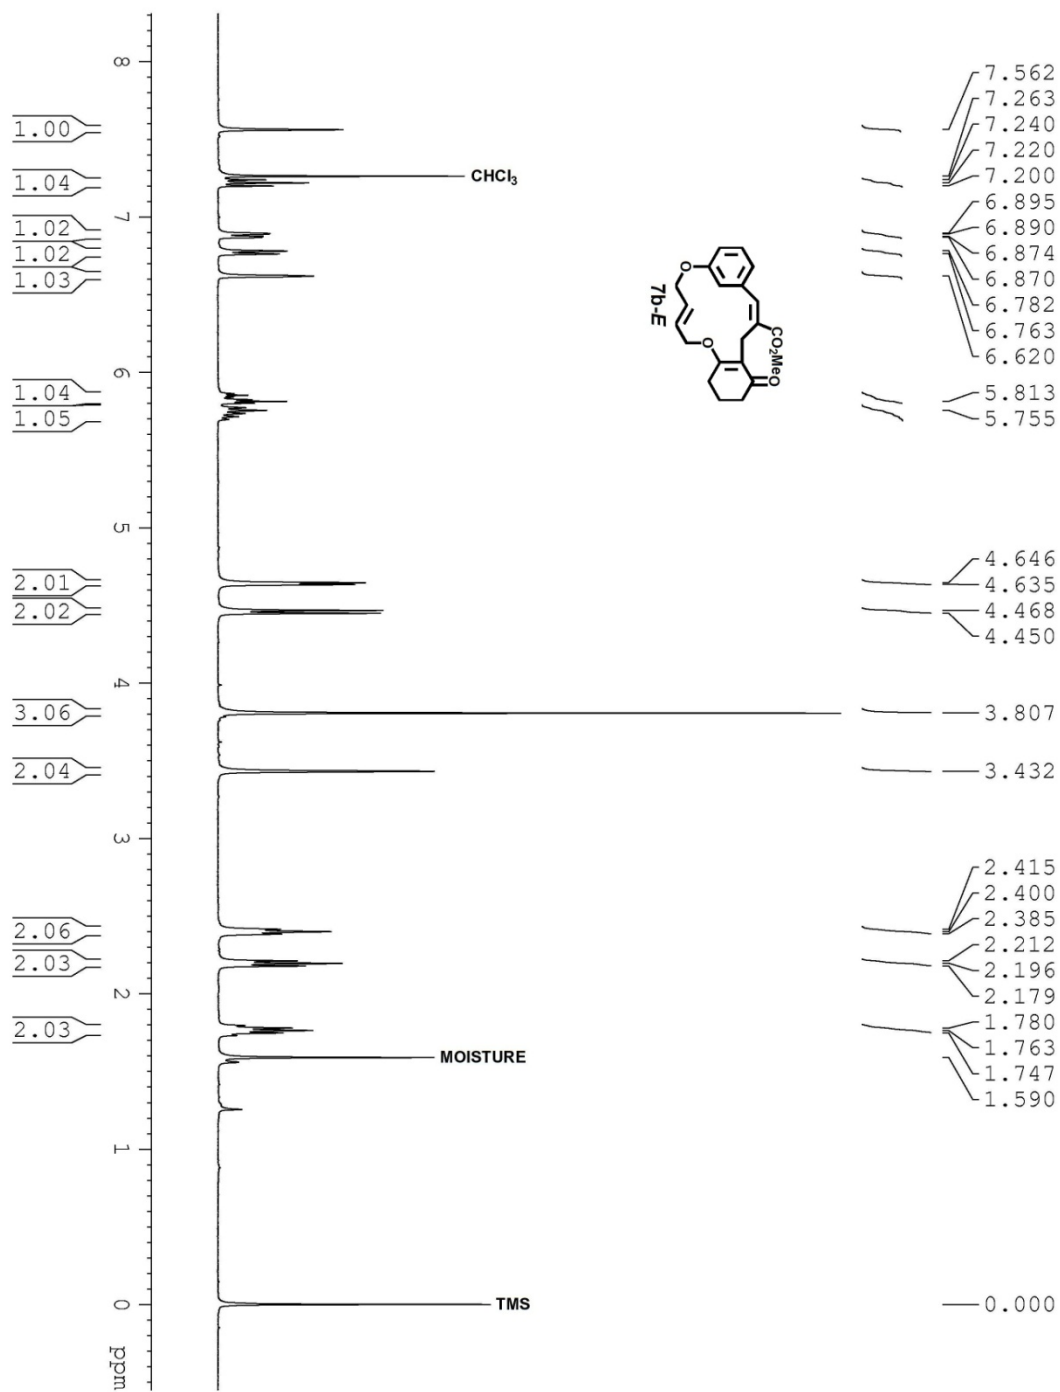

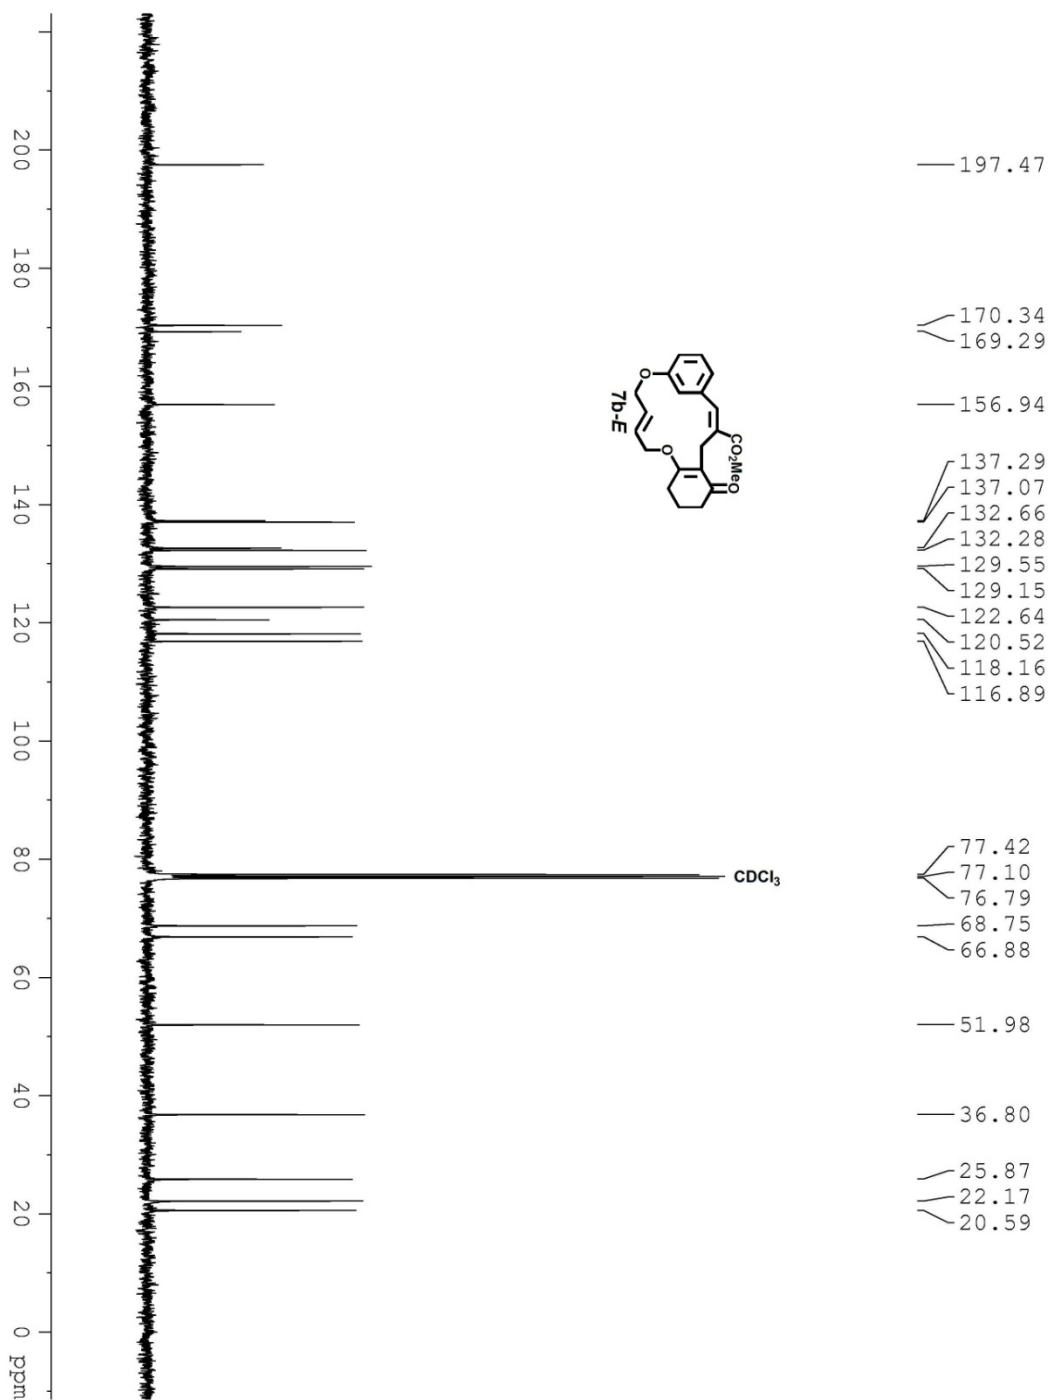

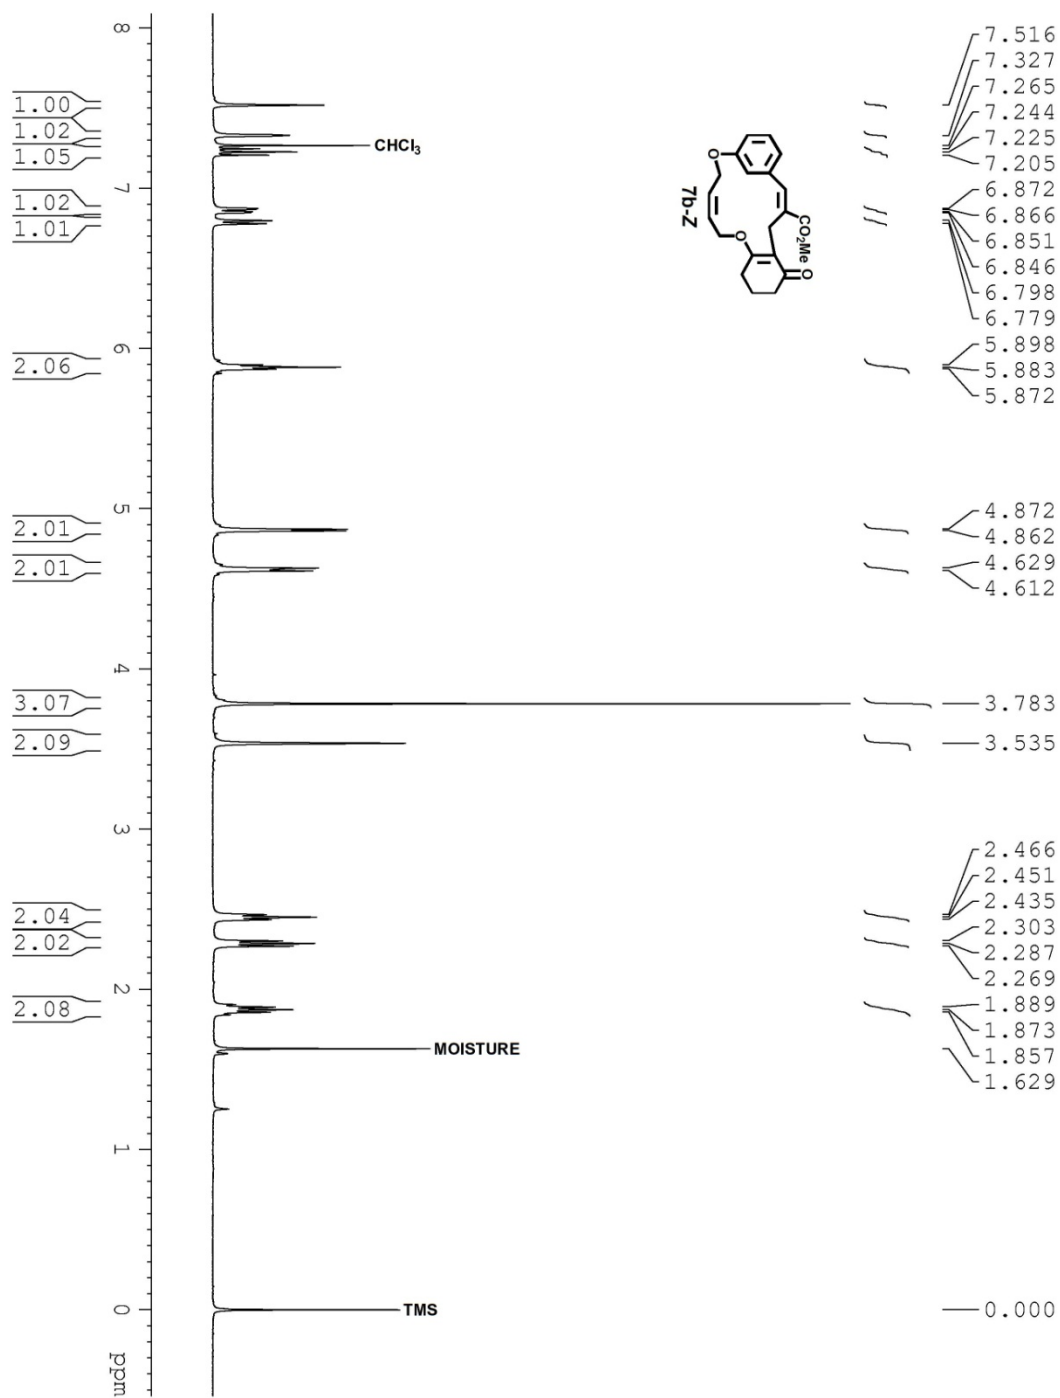

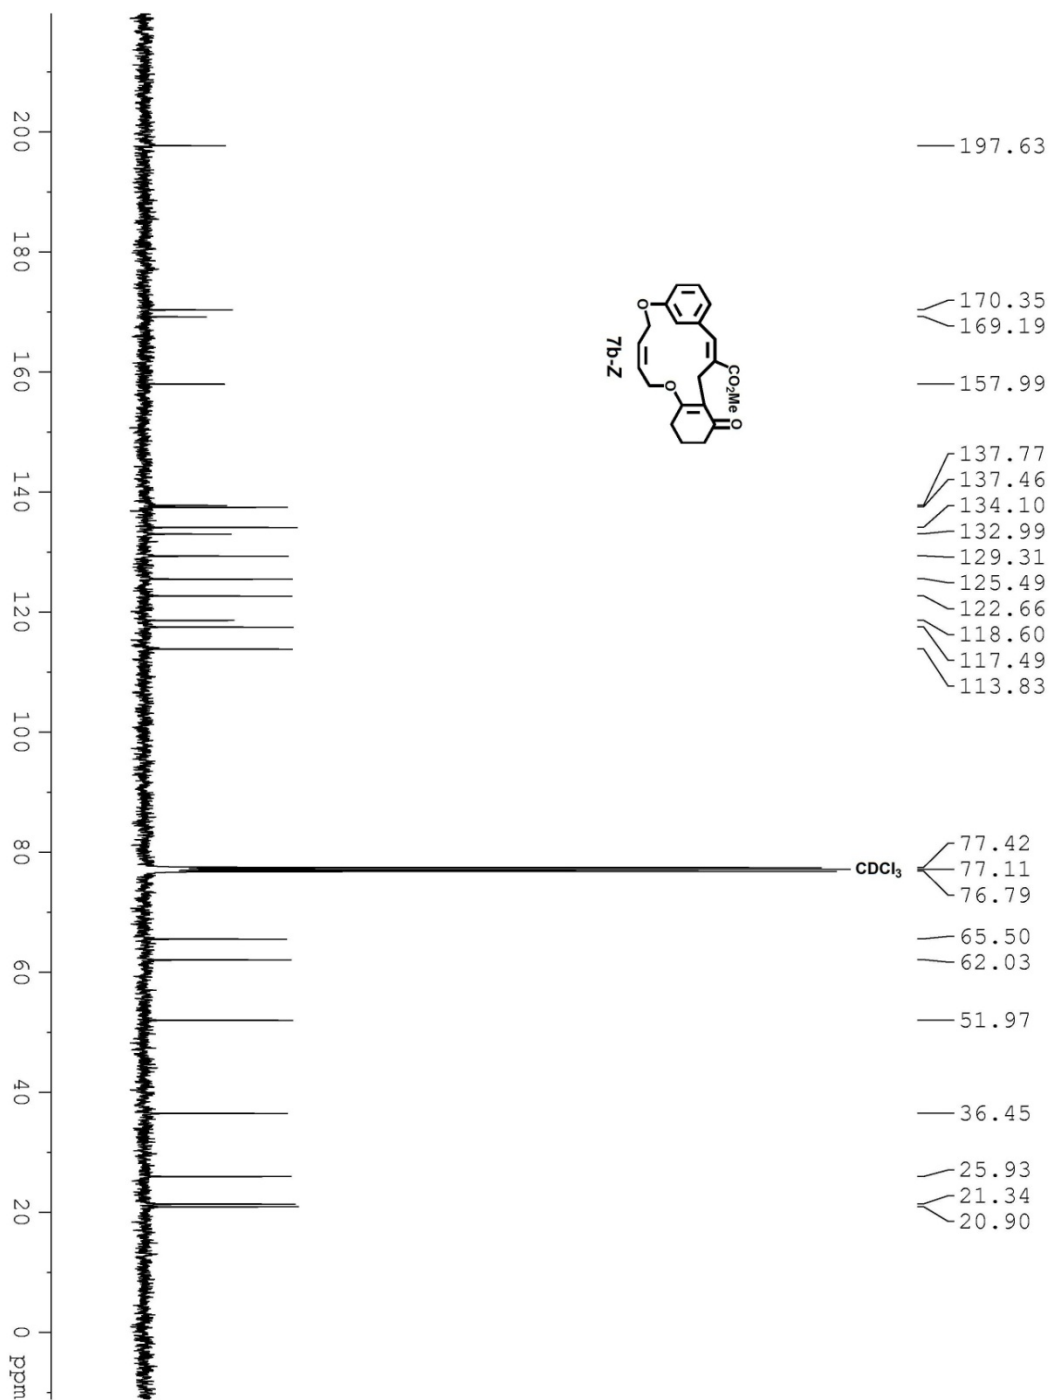

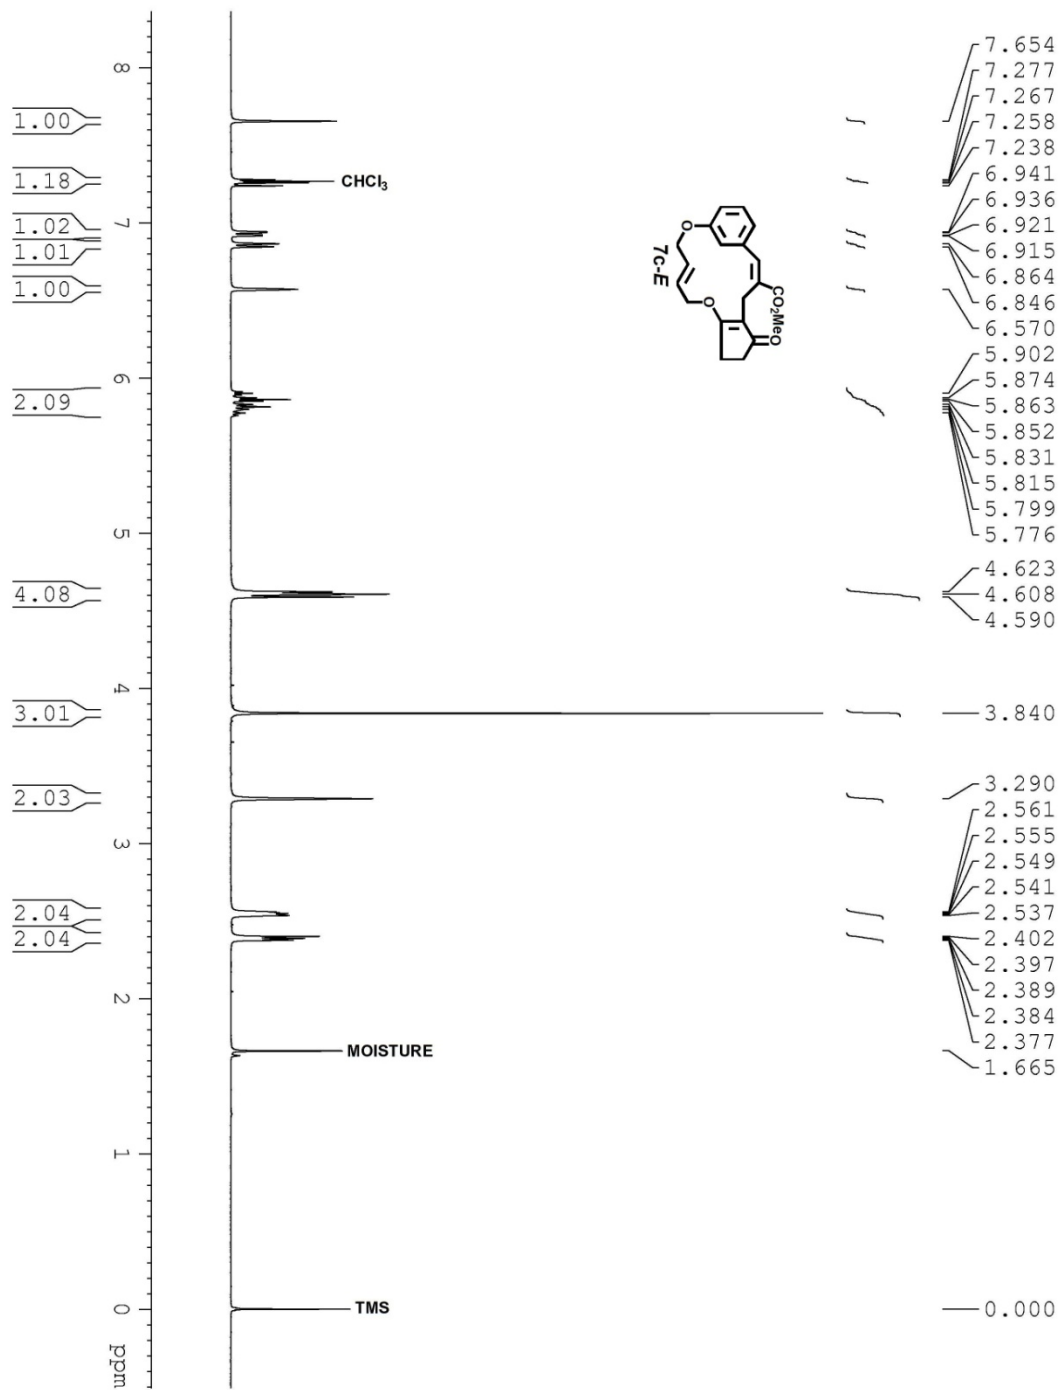

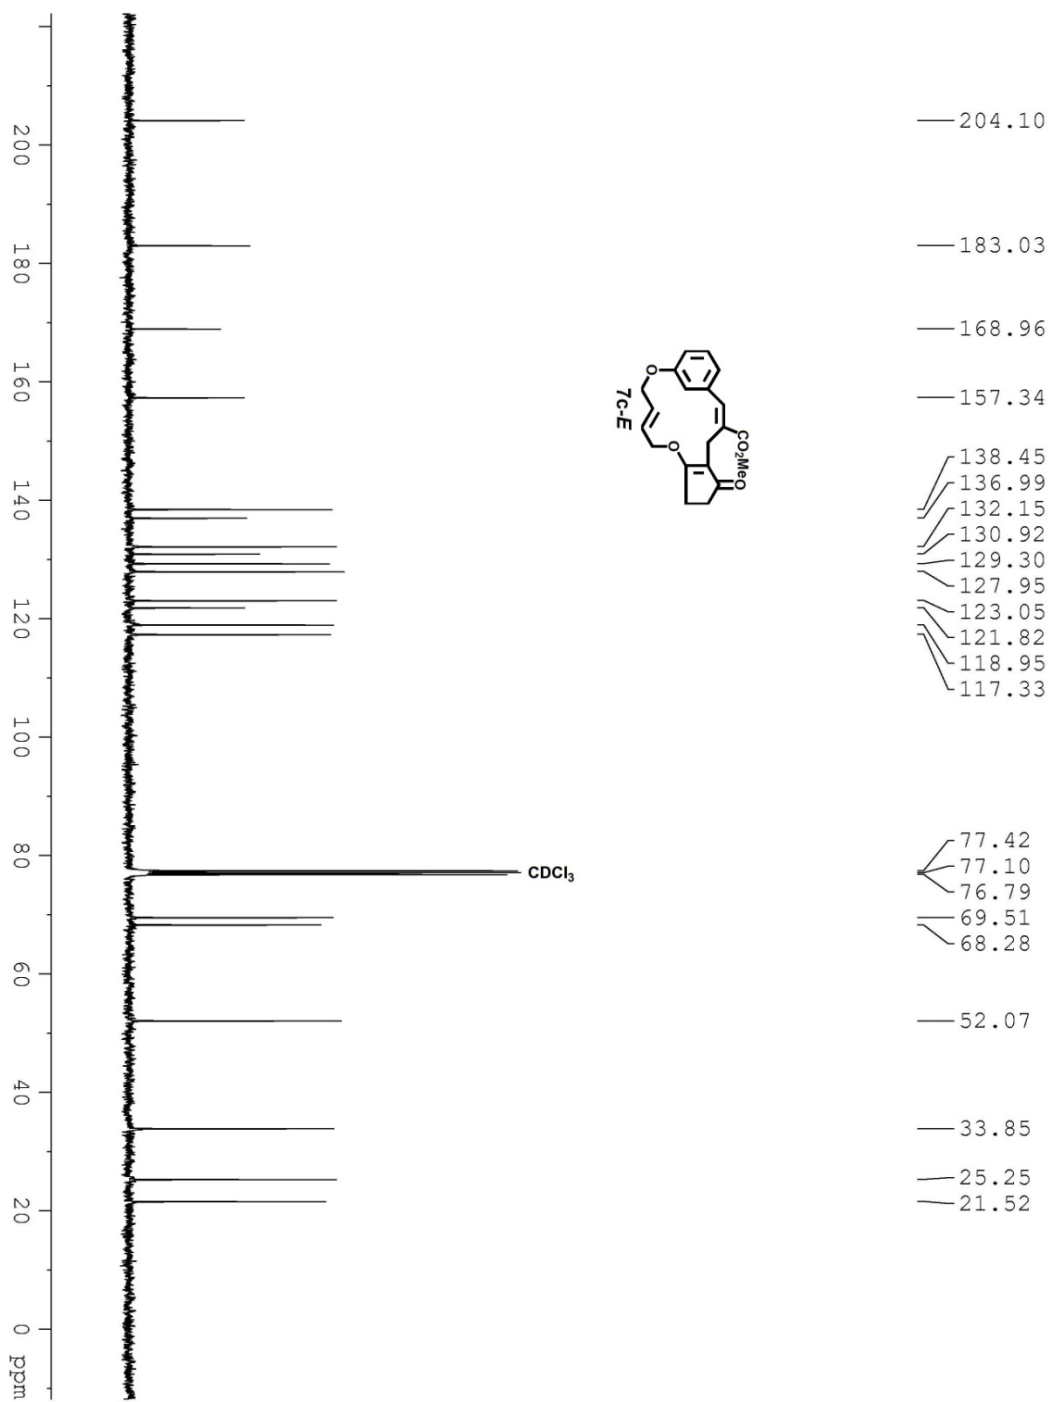

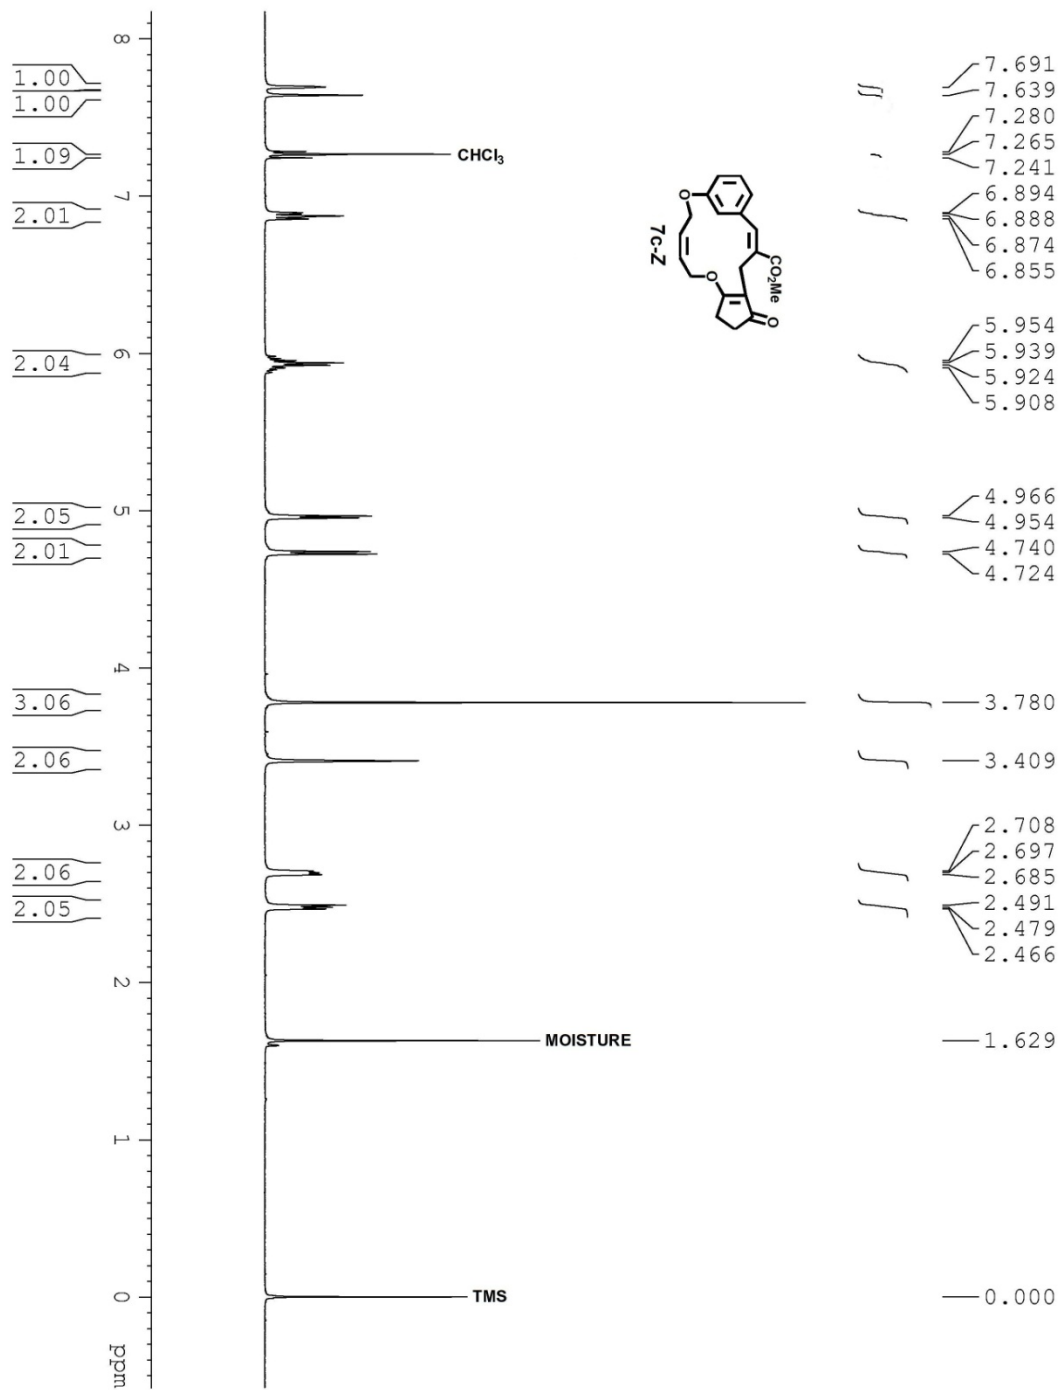



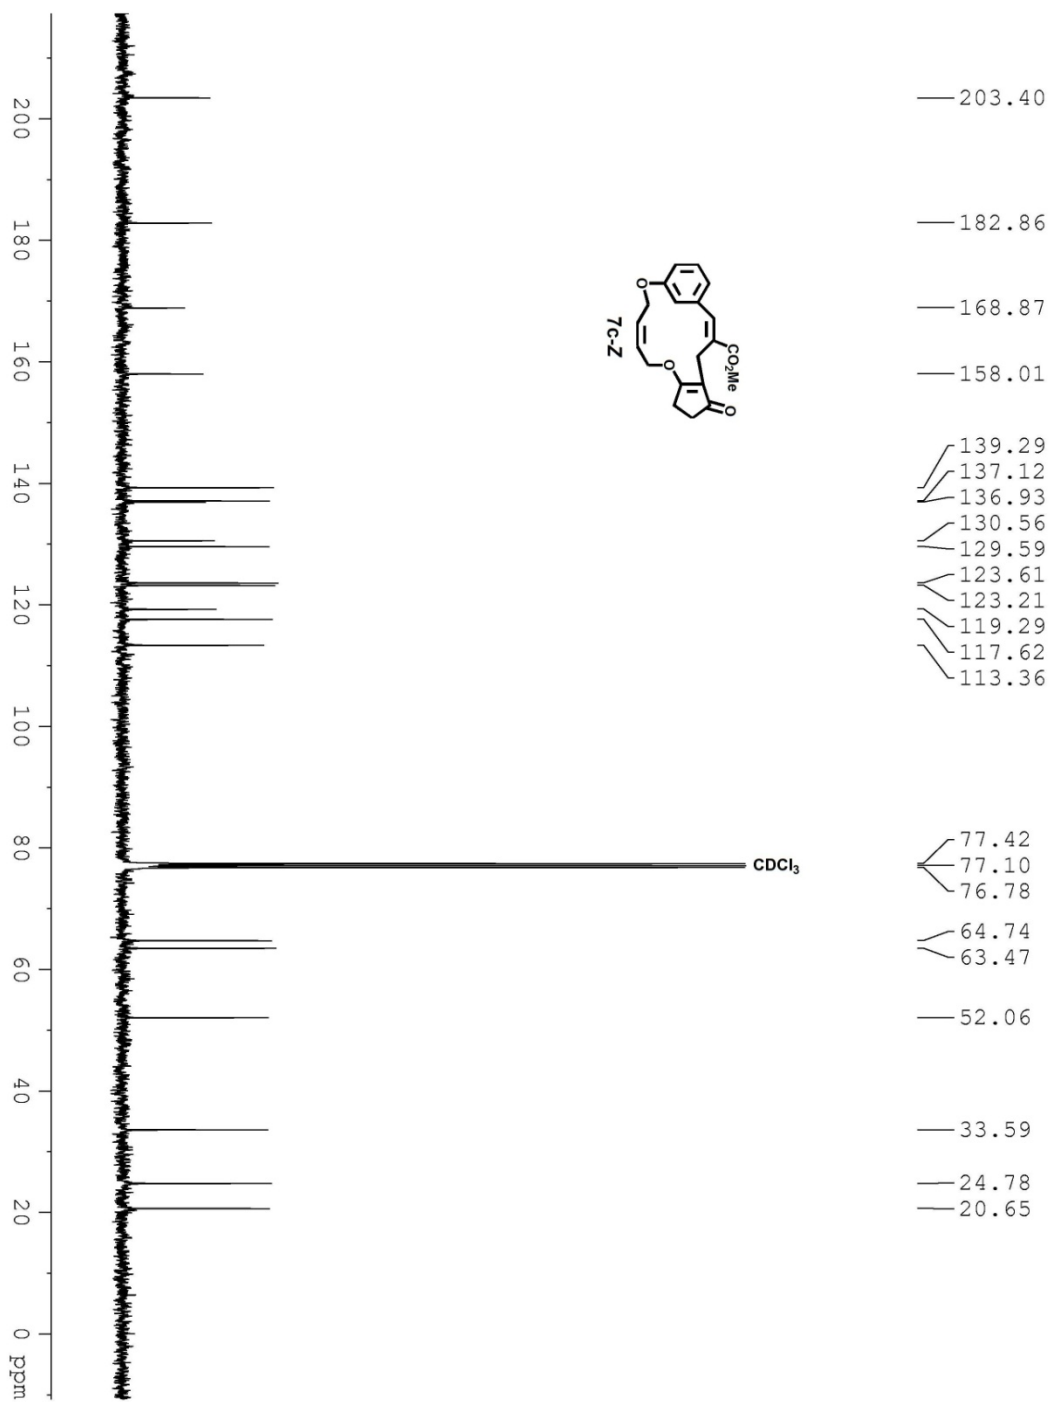

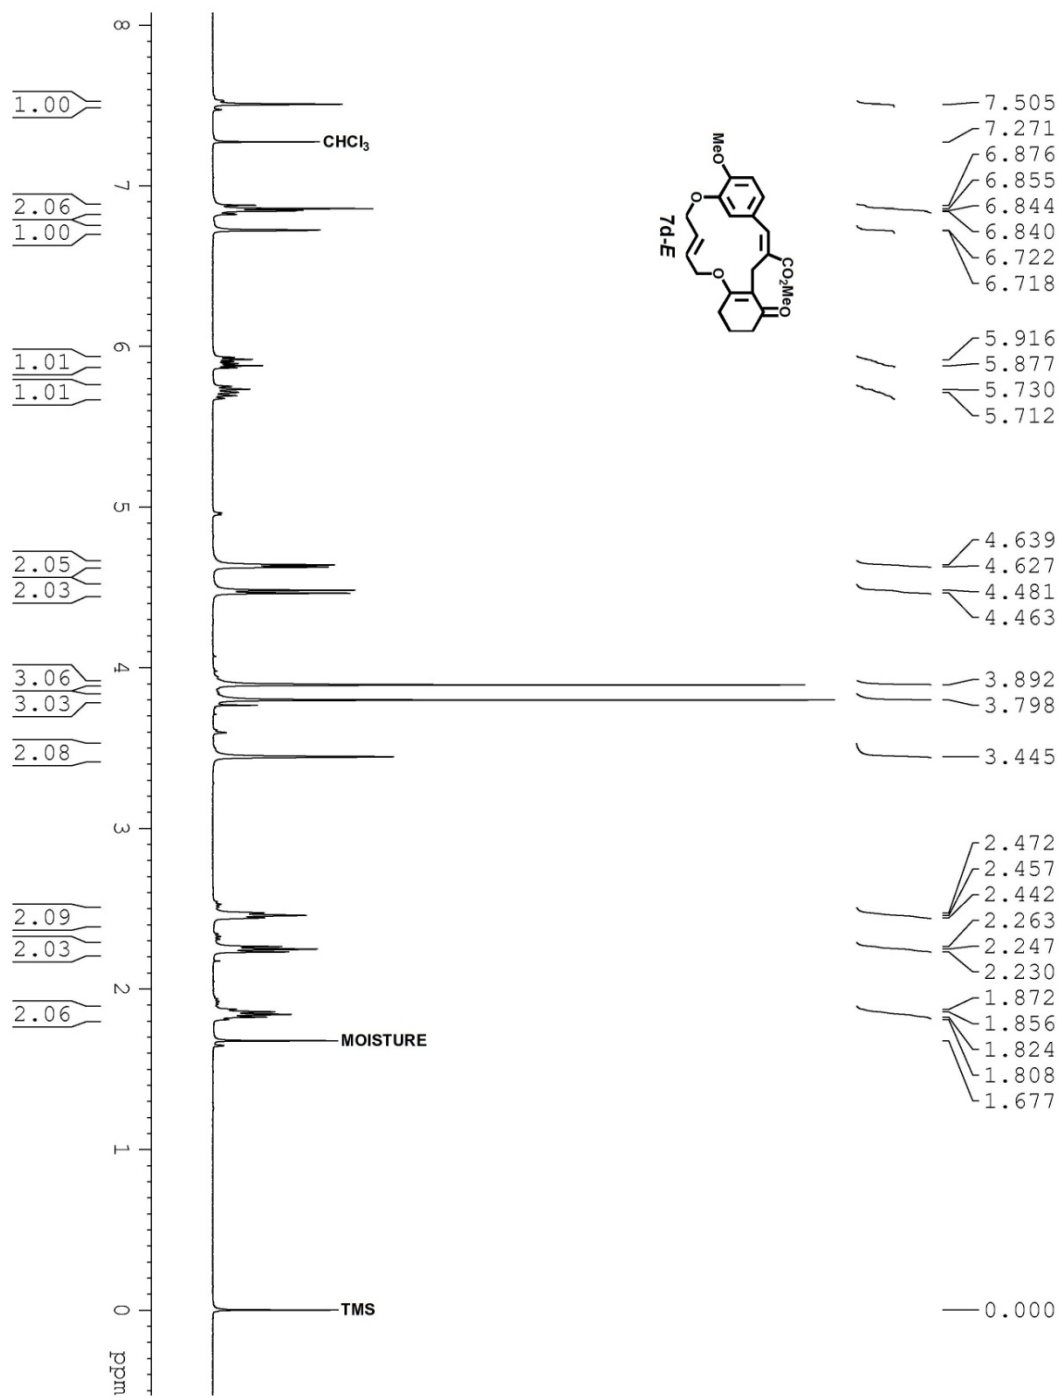

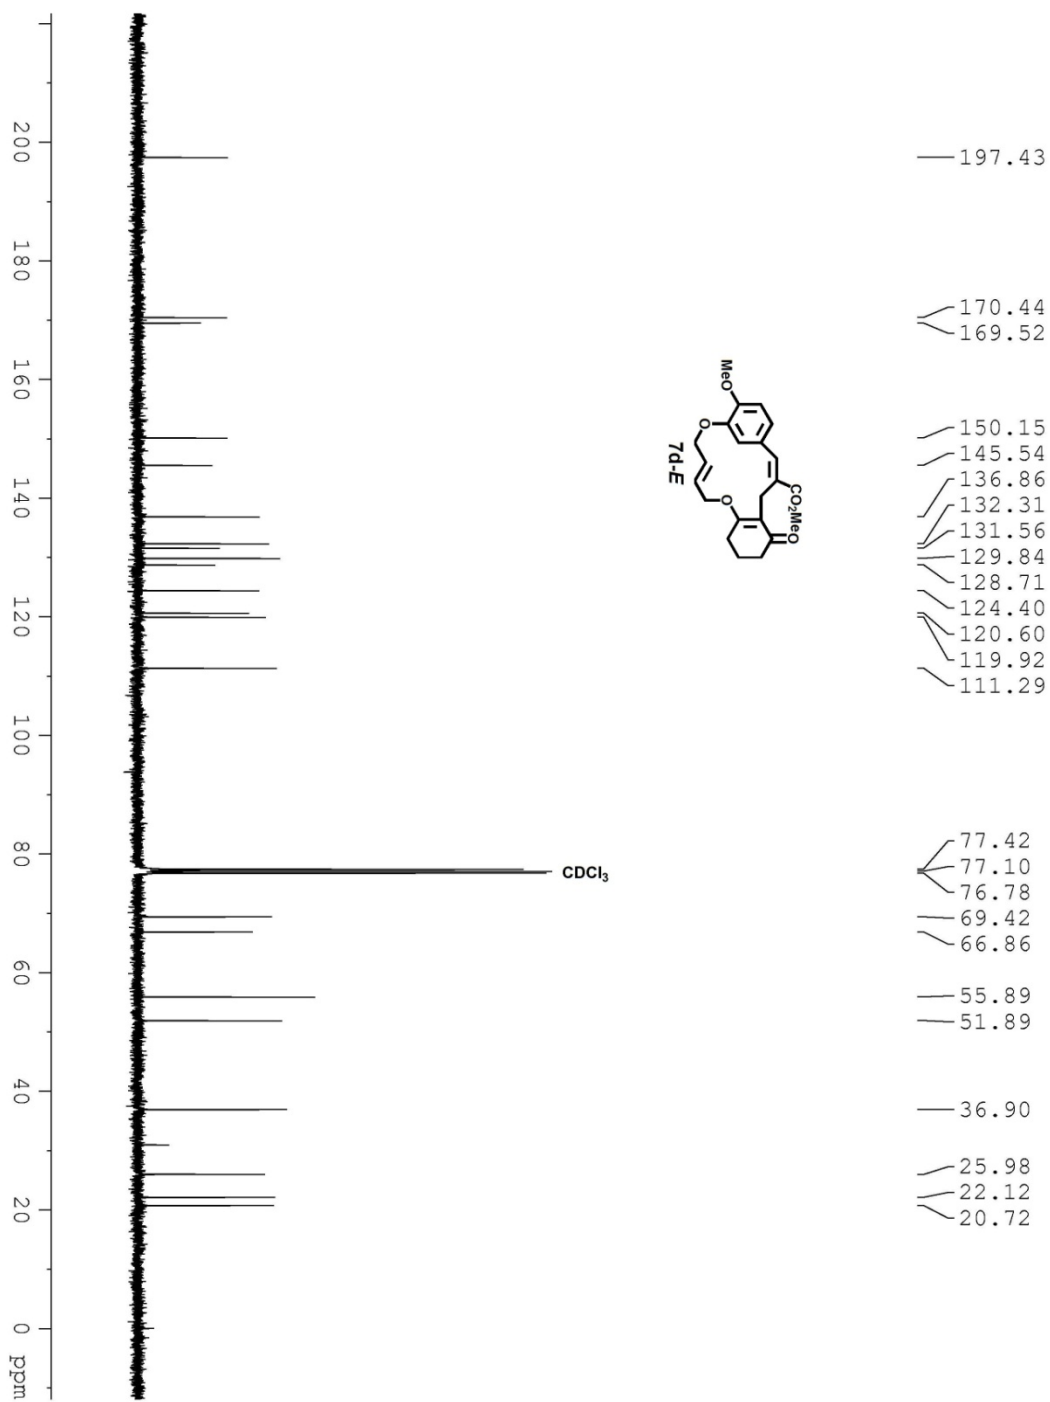

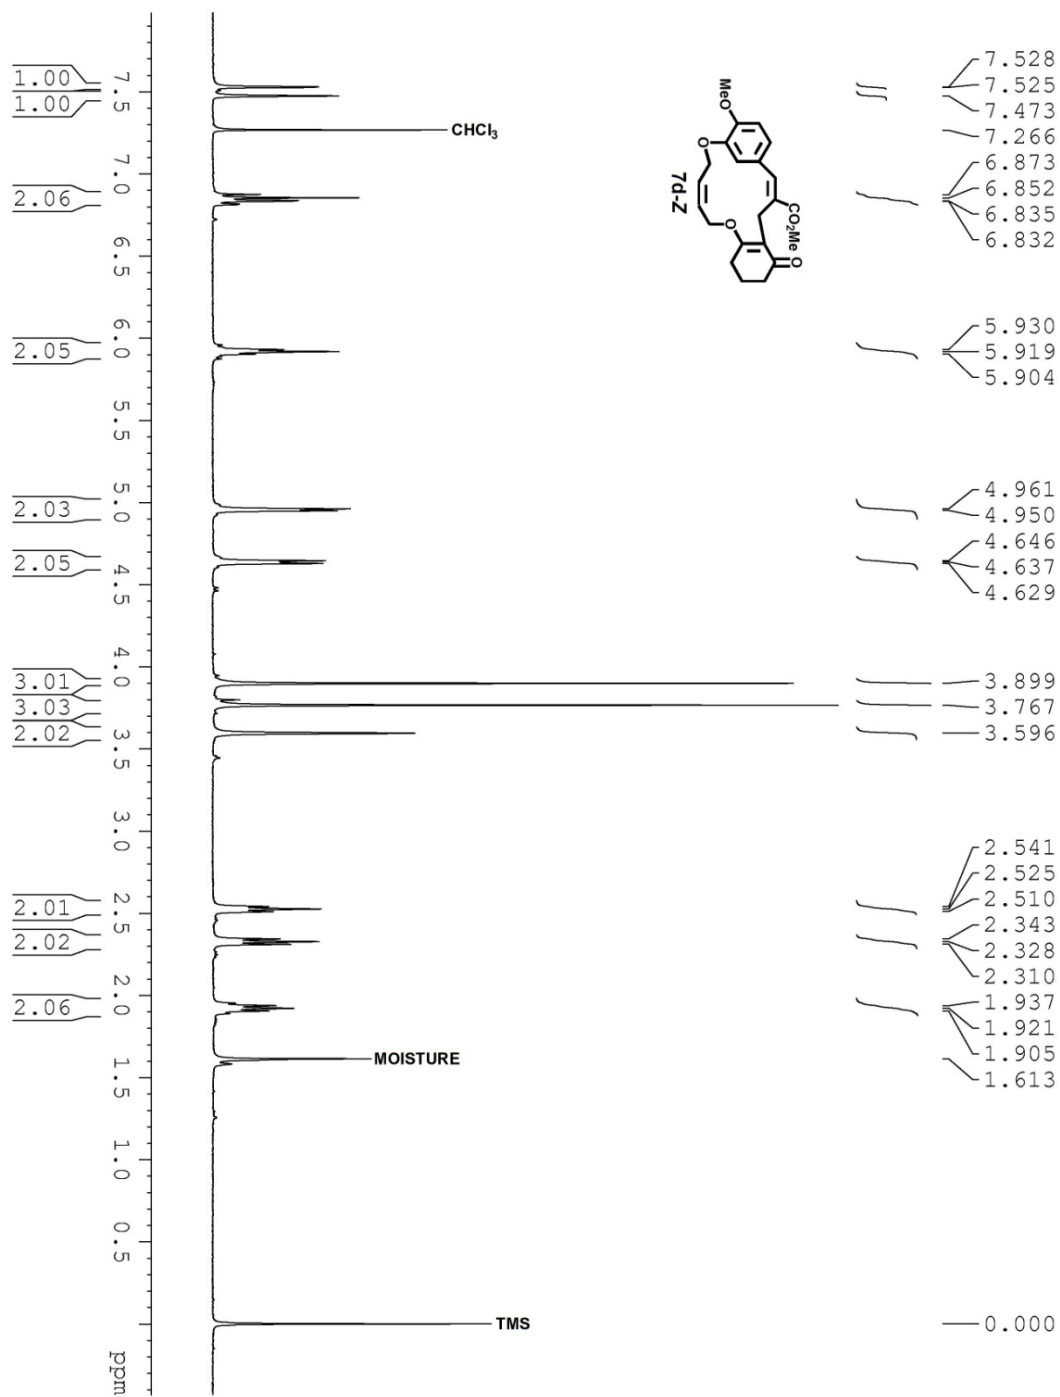

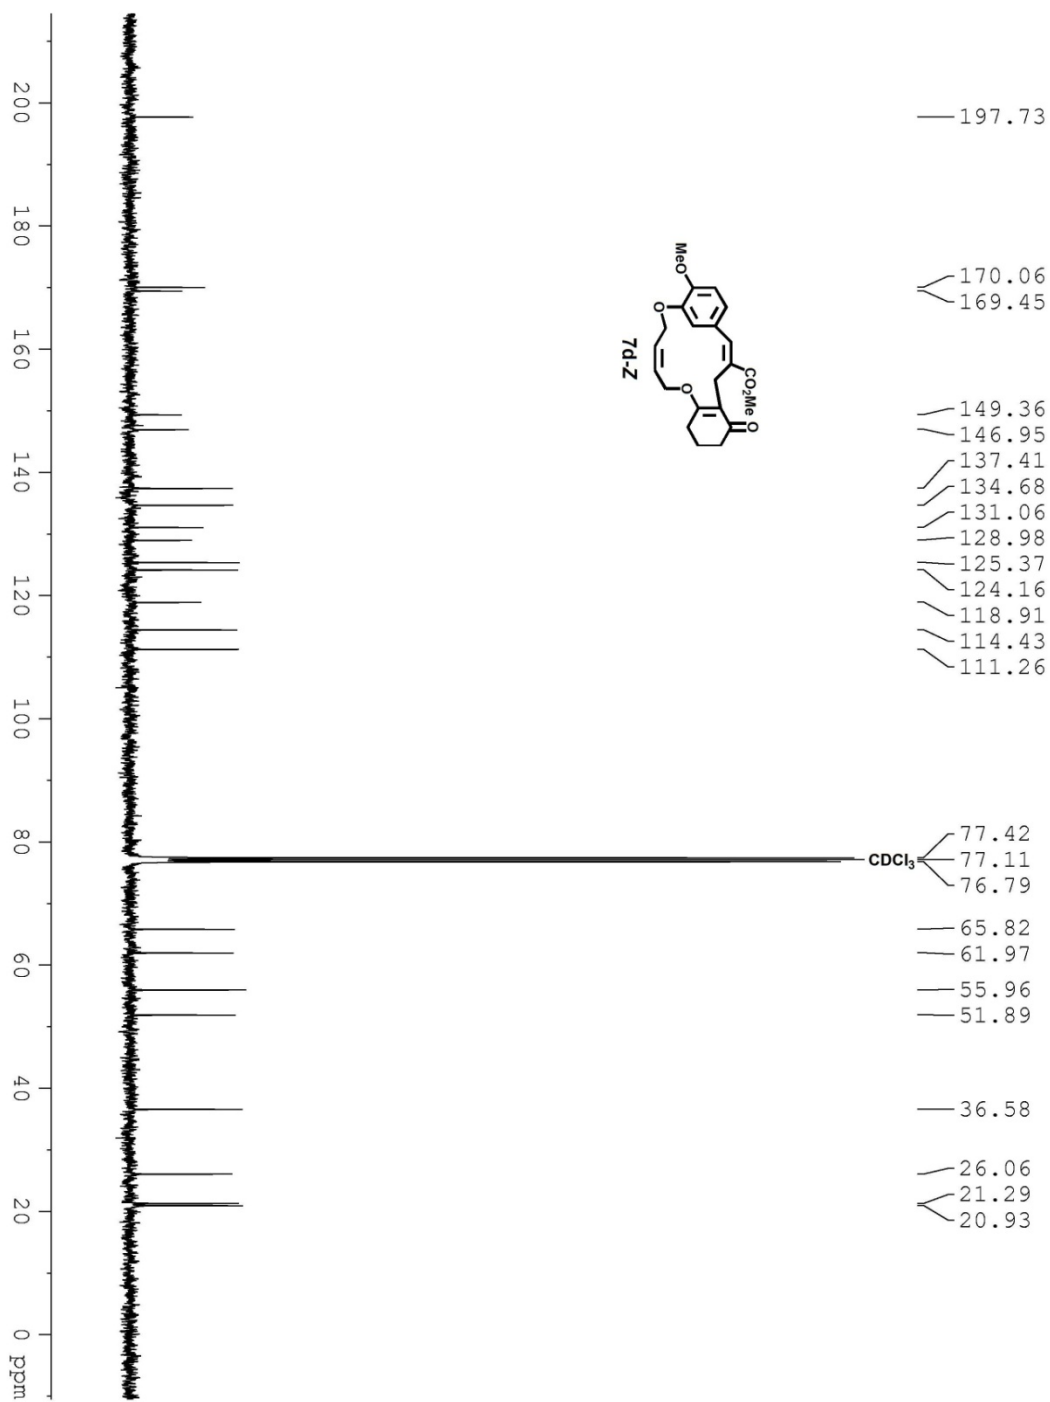

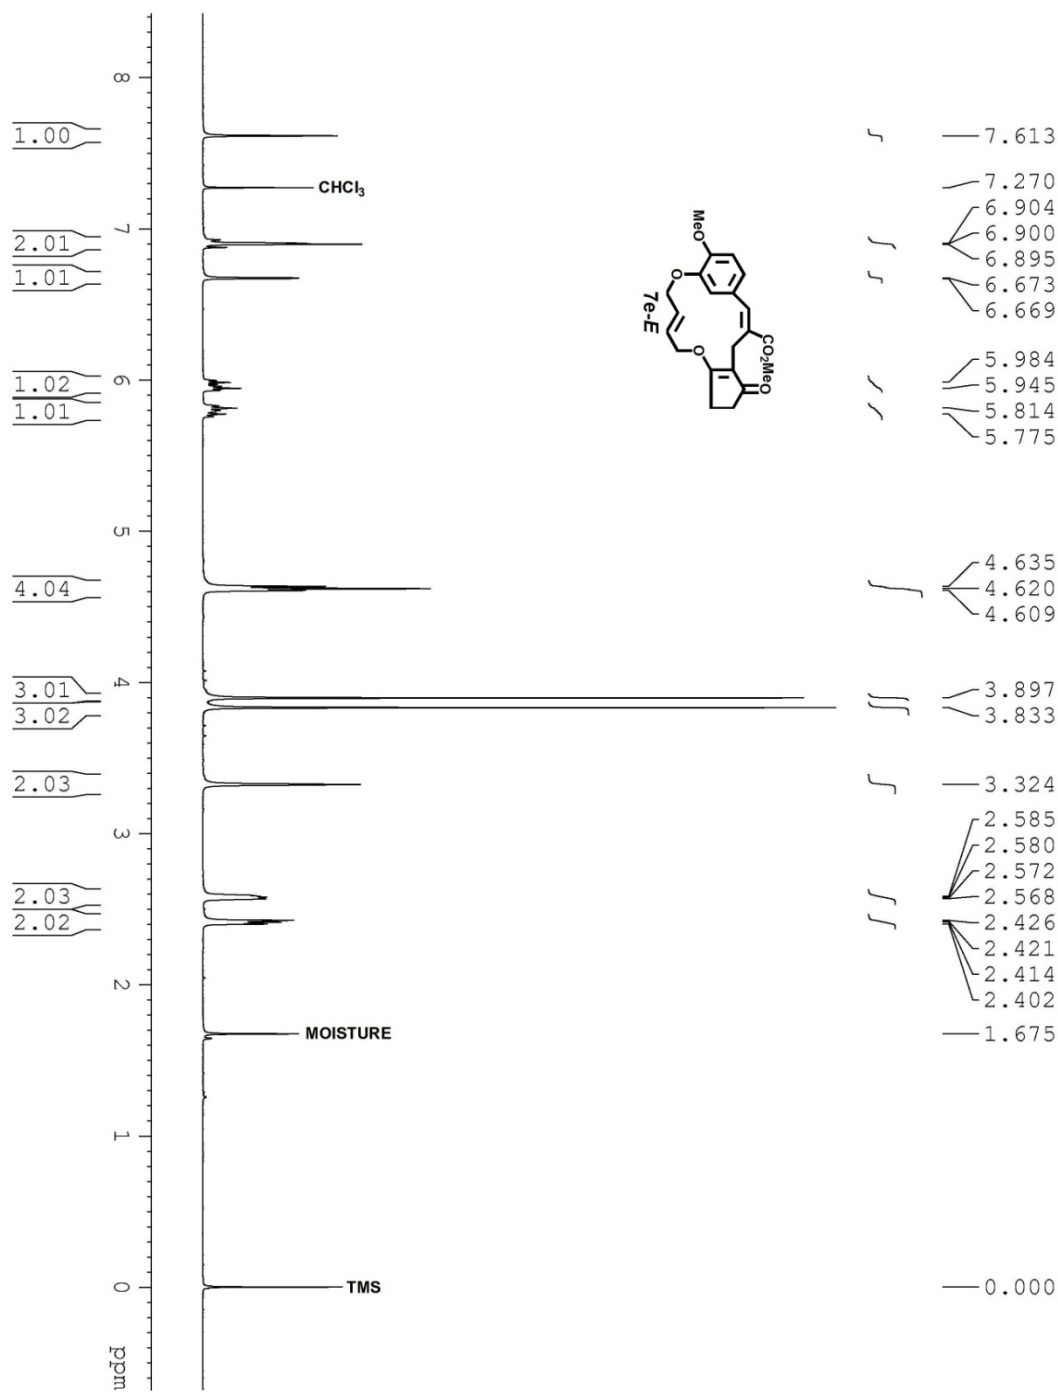

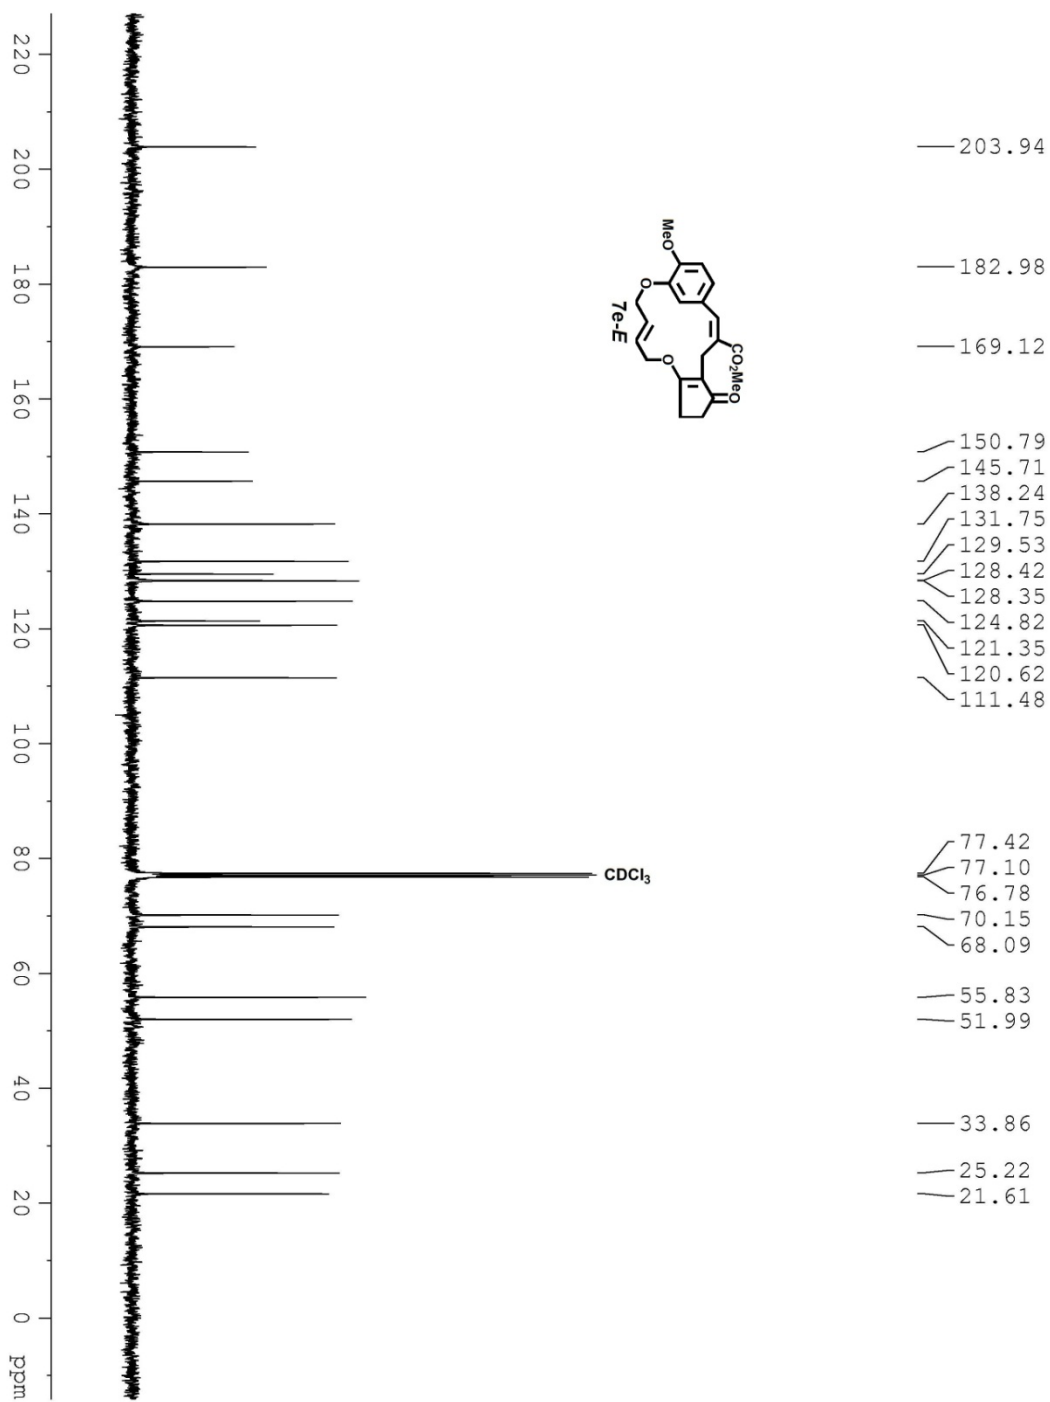

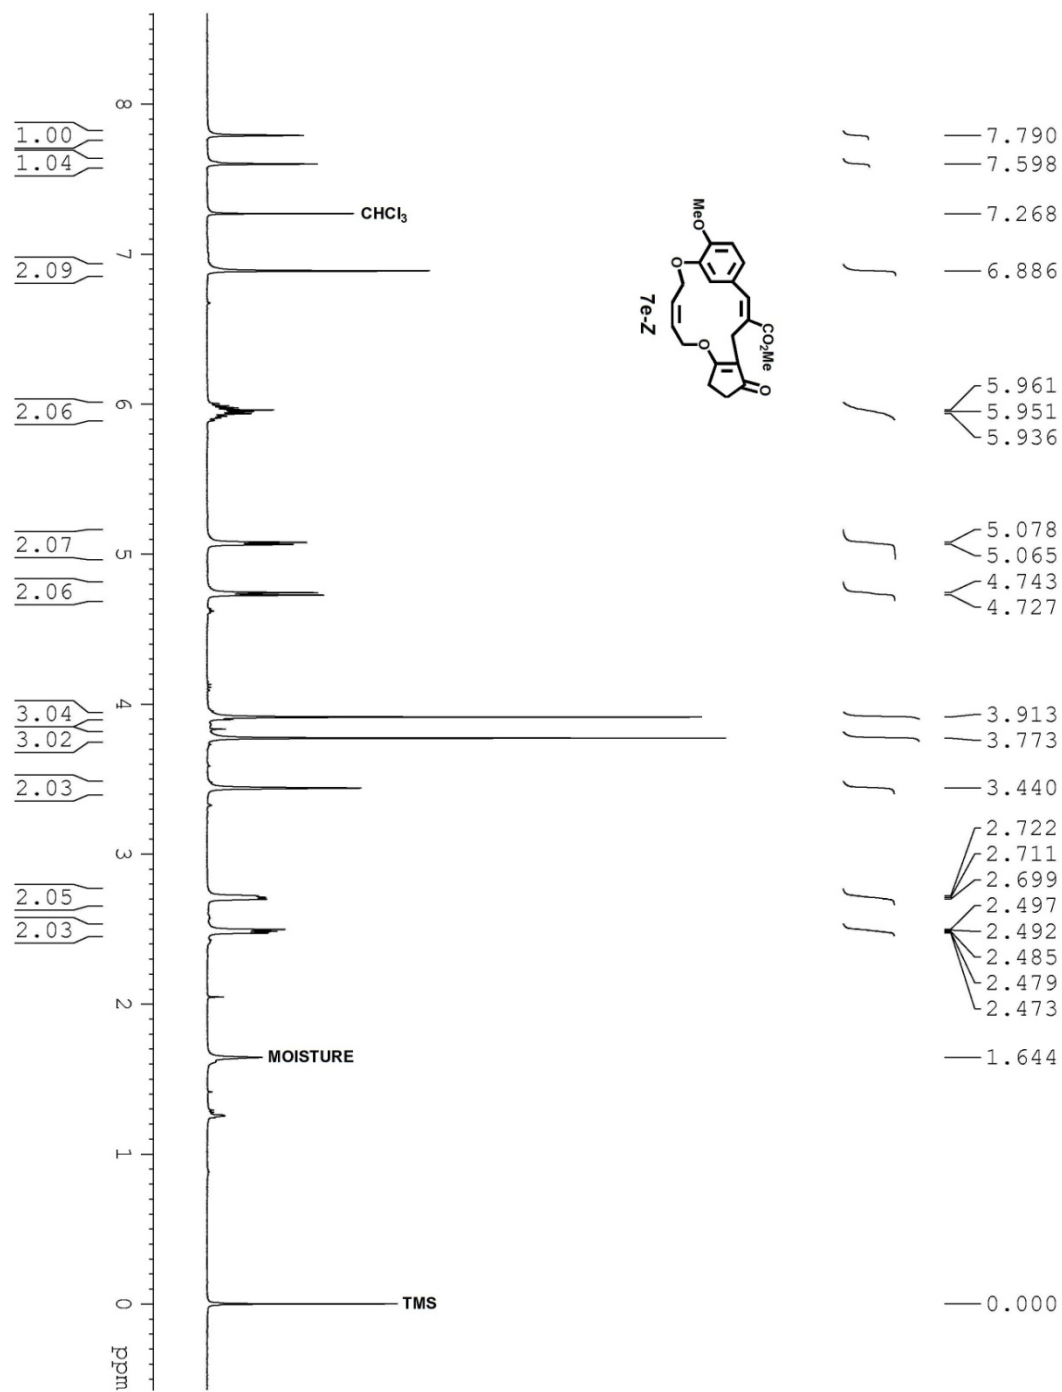





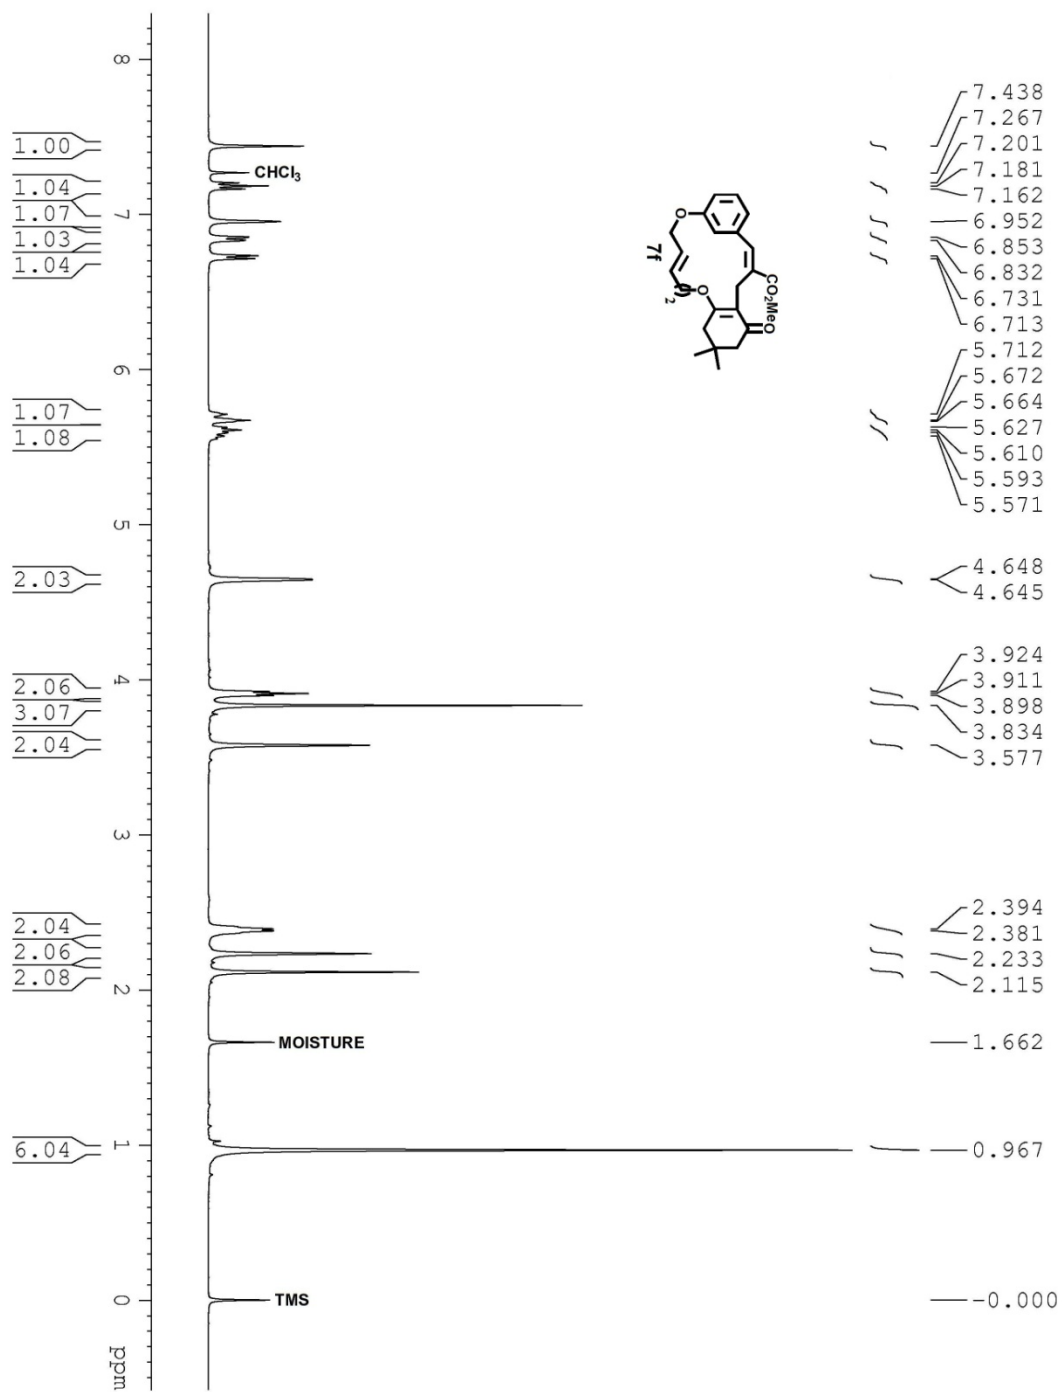

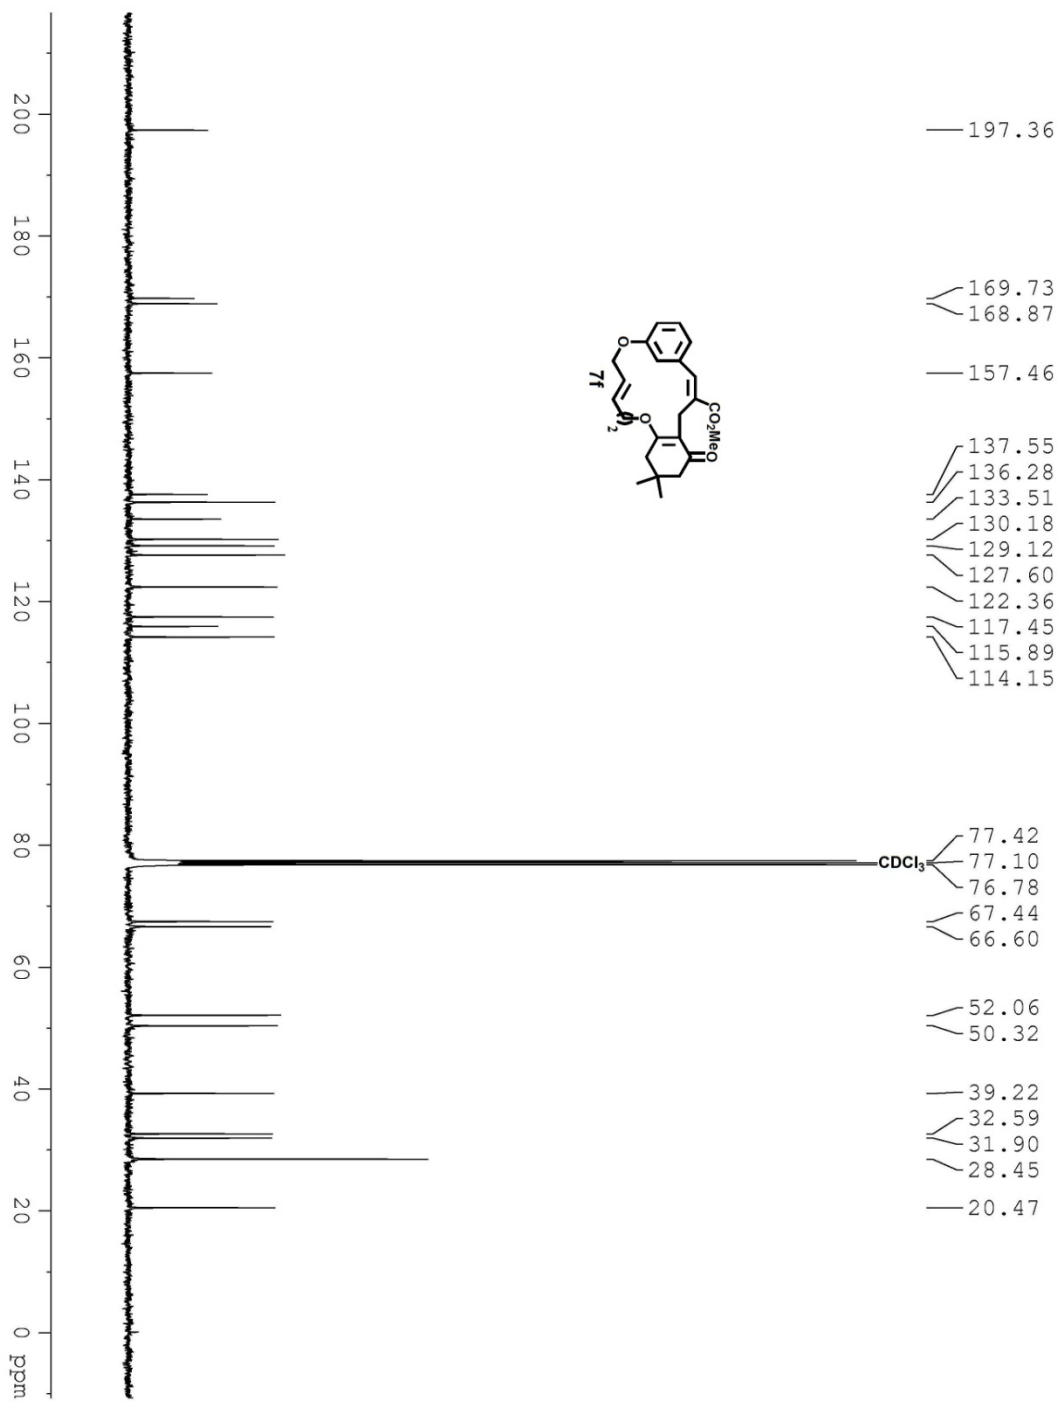

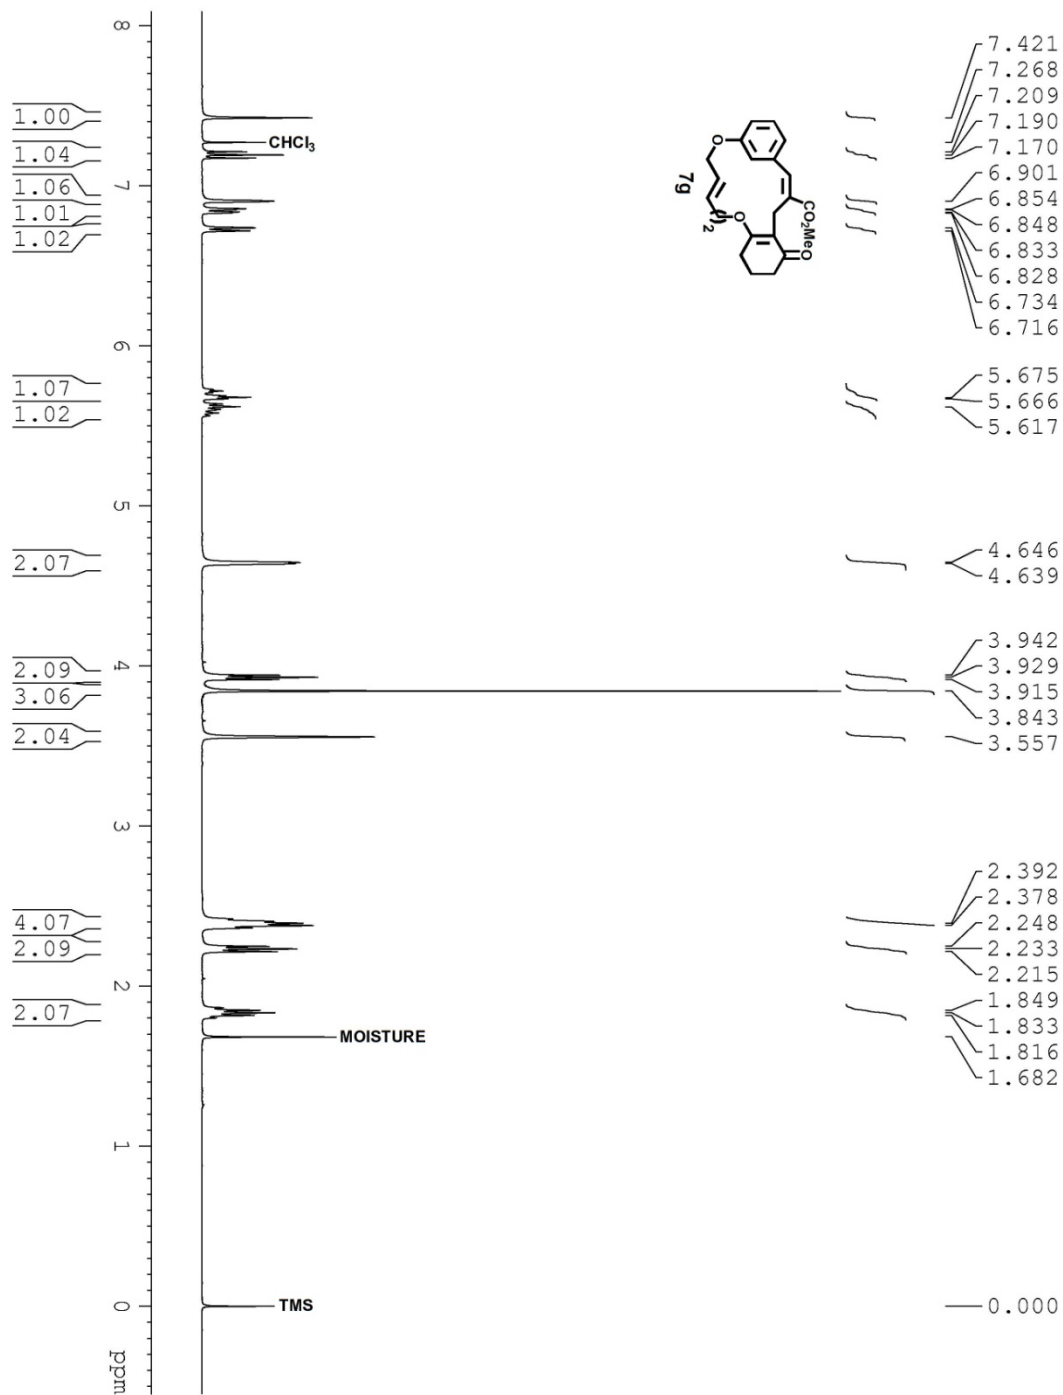

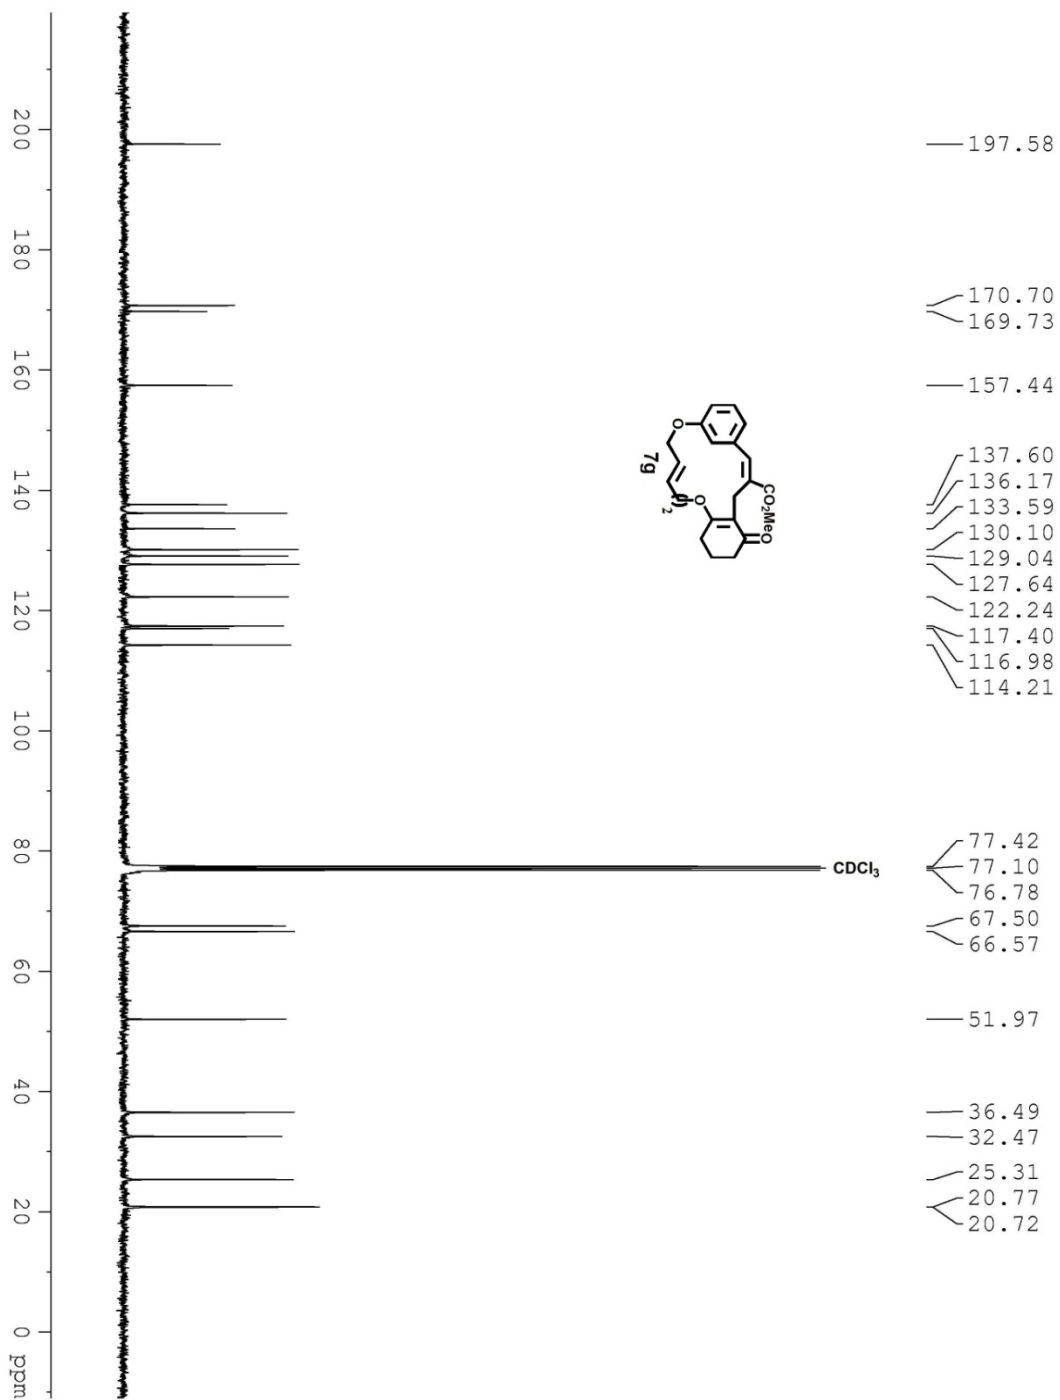

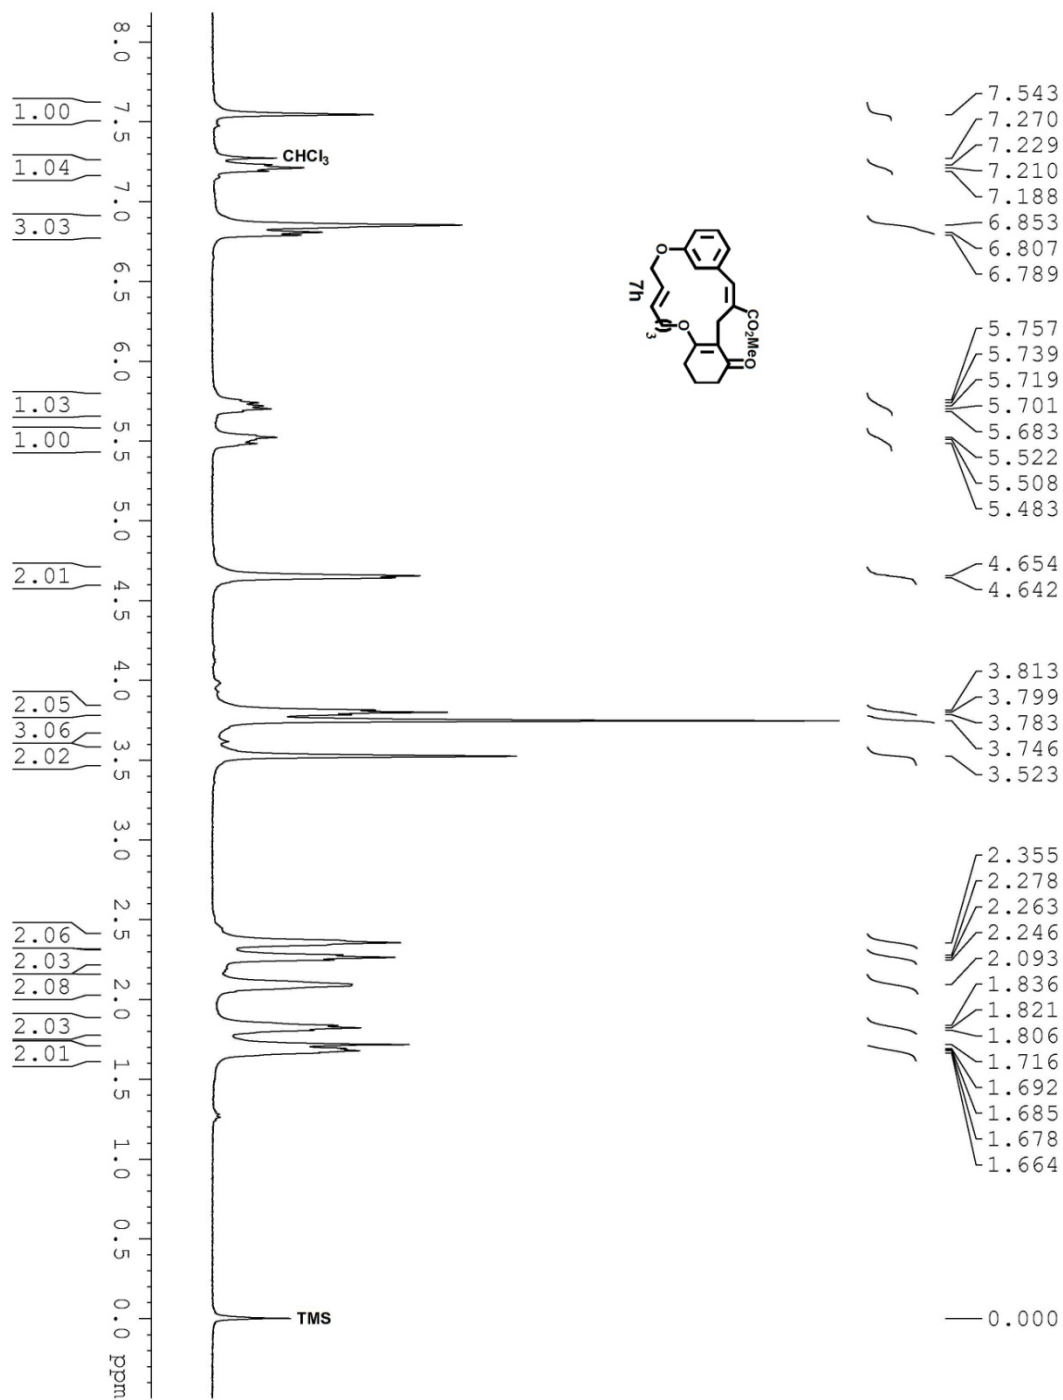

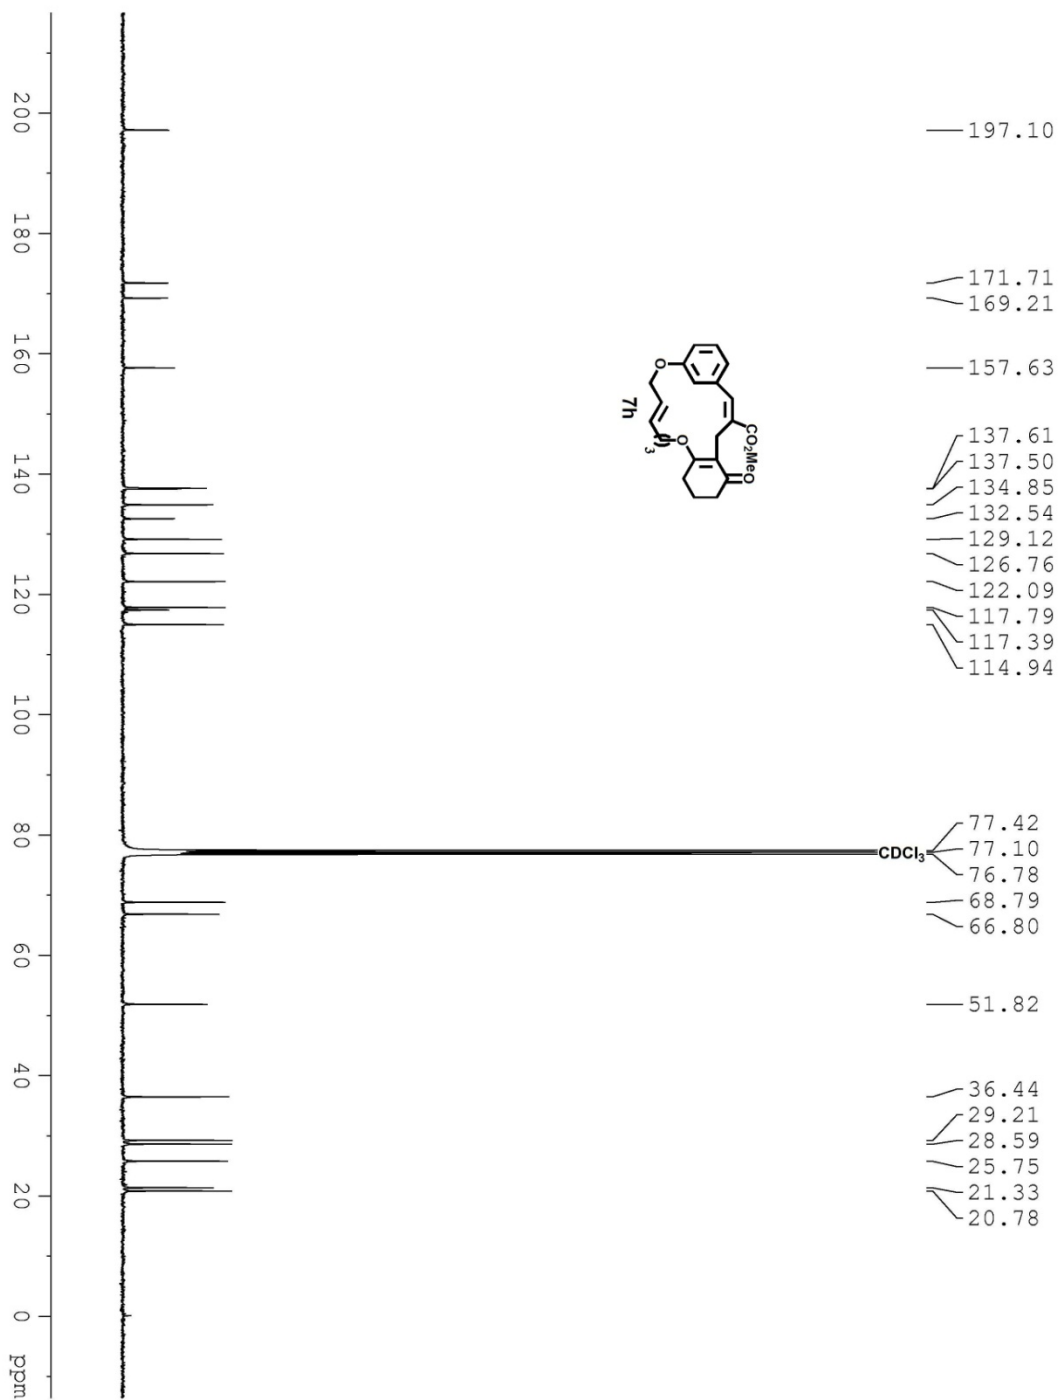

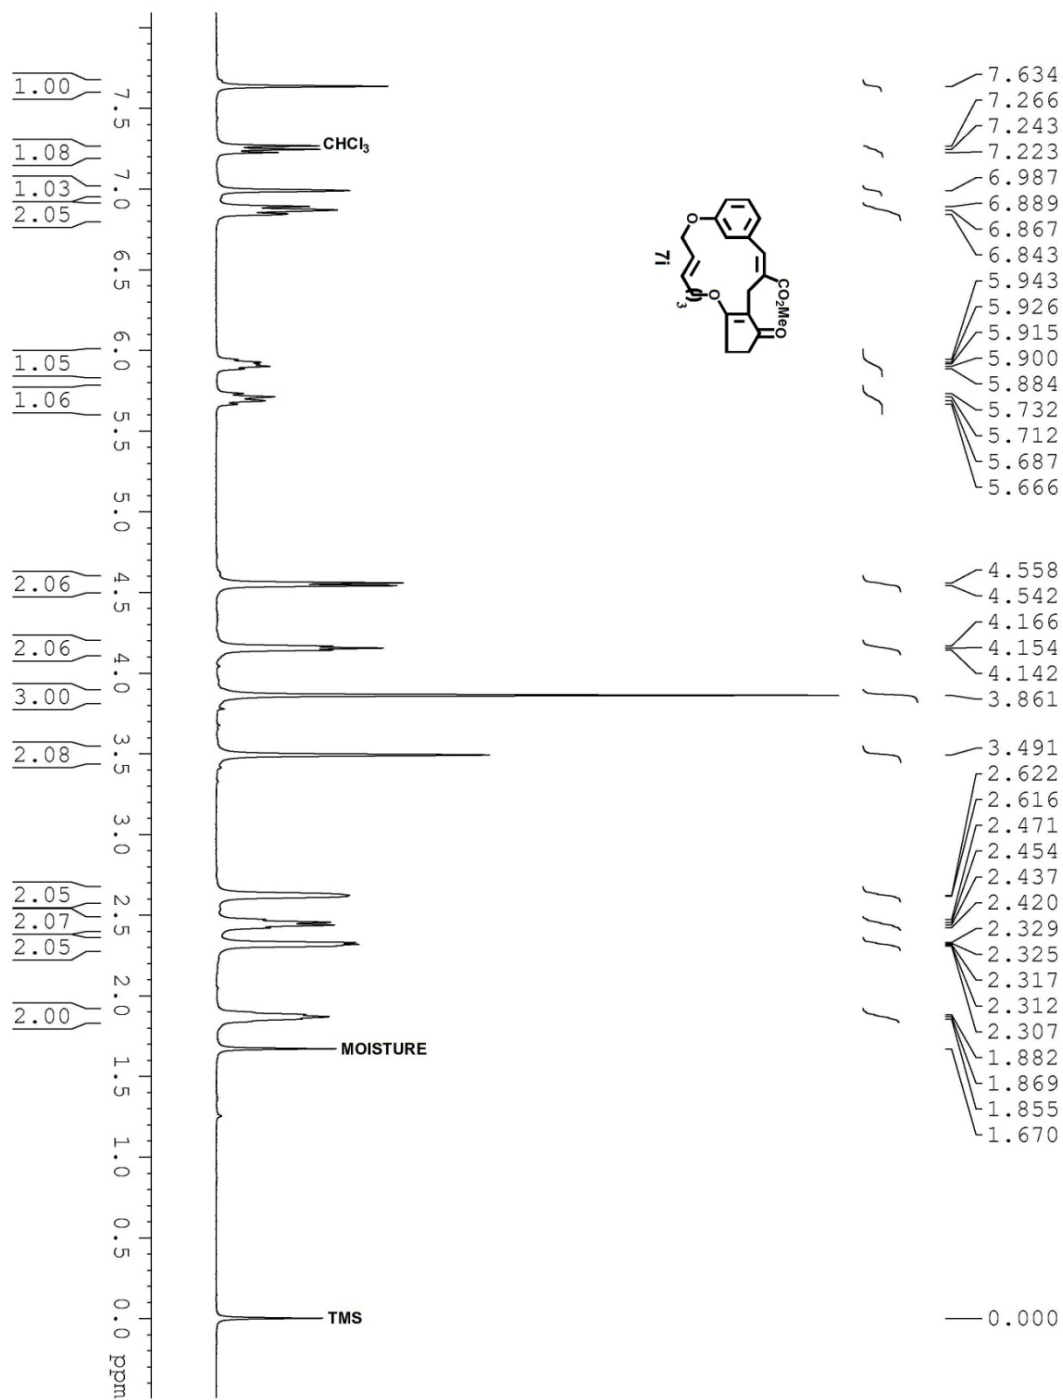



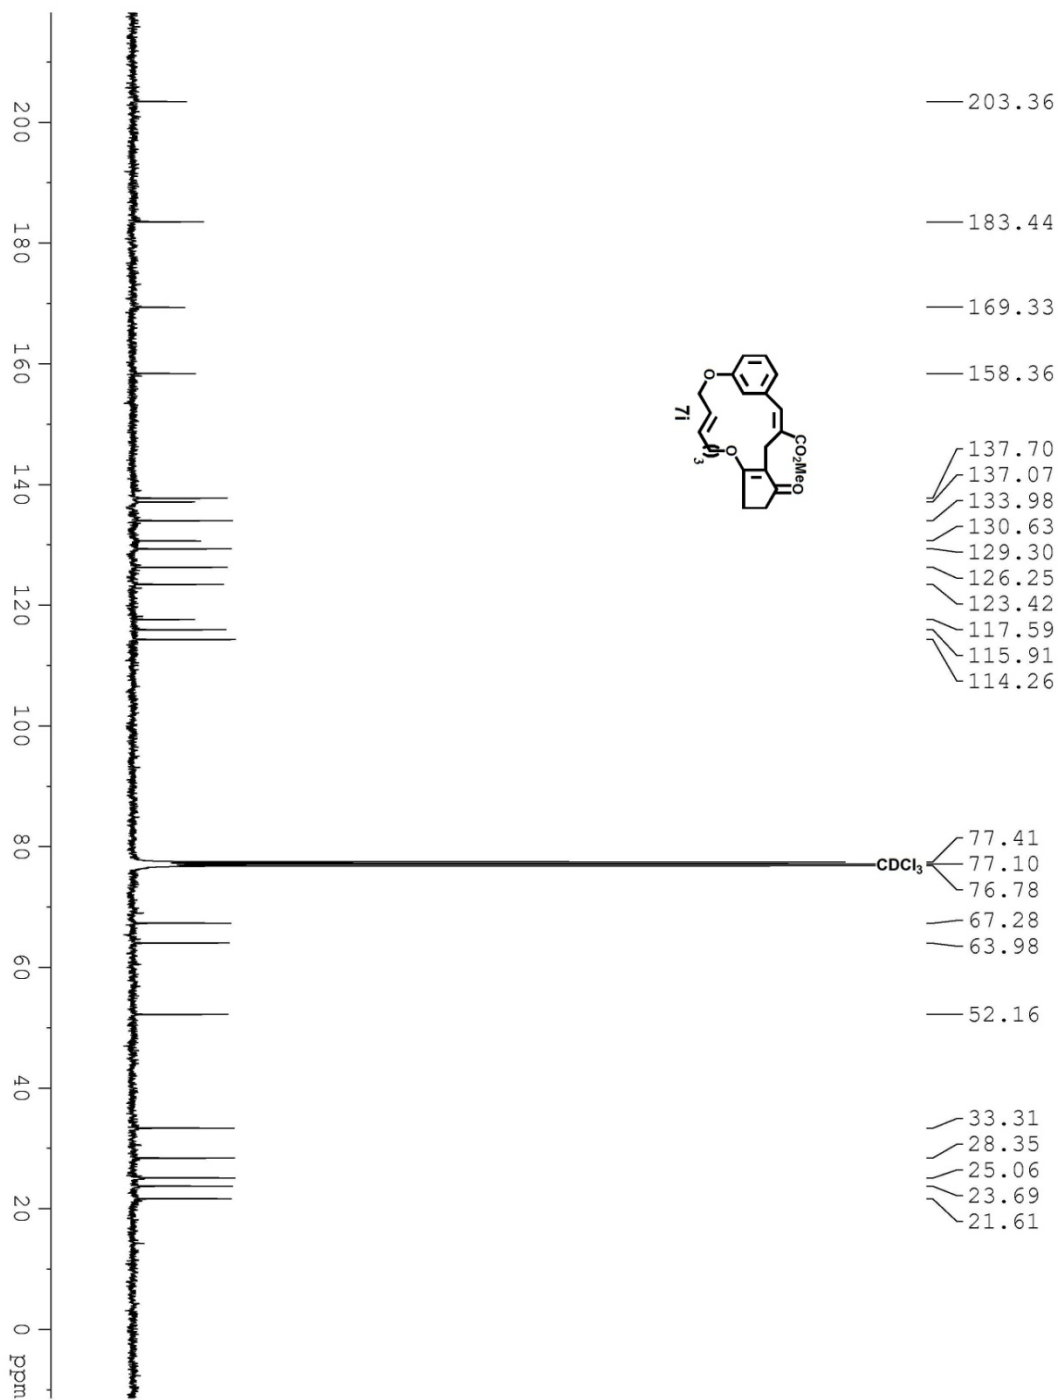

Supplement: c3ra40926k.pdf [file c3ra40926k.pdf]
